# Supplementary material for: Unexpected high abyssal ophiuroid diversity in polymetallic nodule fields of the Northeast Pacific Ocean, and implications for conservation
Source: Copernicus journal article supplement (doi:10.5194/bg-2019-360), 2019-11-26
Supplement: Supplementary file 1 [file Table S_1.xlsx]

## Sheet: p-distance
AB2_EB1_13_16_Ophiotholia_Species_1	1	2	3	4	5	6	7	8	9	10	11	12	13	14	15	16	17	18	19	20	21	22	23	24	25	26	27	28	29	30	31	32	33	34	35	36	37	38	39	40	41	42	43	44	45	46	47	48	49
AB2_EB1_13_20_Ophiotholia_Species_1	0.014
AB2_EB1_14_22_Ophiotholia_Species_1	0.017	0.014
AB2_EB2_15_12_Ophiotholia_Species_1	0.018	0.015	0.017
AB2_EB1_16_14_Ophiotholia_Species_1	0.012	0.009	0.012	0.012
NODBIO_33_9_Ophiotholia_Species_1	0.015	0.012	0.014	0.009	0.006
MA13_07_8_Ophiotholia_Species_1	0.014	0.014	0.018	0.014	0.011	0.014
MA13_18_6_Ophiotholia_Species_1	0.024	0.021	0.021	0.017	0.018	0.015	0.02
MA13_85_3_Ophiotholia_Species_1	0.018	0.008	0.018	0.017	0.014	0.014	0.018	0.023
MA13_90_18_Ophiotholia_Species_1	0.02	0.014	0.018	0.014	0.014	0.014	0.018	0.021	0.012
MA14_38_13_Ophiotholia_Species_1	0.018	0.015	0.02	0.012	0.012	0.012	0.014	0.021	0.017	0.017
MA14_39_2_Ophiotholia_Species_1	0.015	0.011	0.018	0.014	0.011	0.014	0.009	0.023	0.012	0.018	0.014
MA14_66_16_Ophiotholia_Species_1	0.011	0.008	0.009	0.011	0.008	0.008	0.012	0.017	0.009	0.012	0.011	0.012
MA14_67_4_Ophiotholia_Species_1	0.015	0.011	0.02	0.015	0.012	0.012	0.017	0.021	0.009	0.011	0.015	0.015	0.011
SO239_20_11_Ophiotholia_Species_1	0.017	0.011	0.012	0.011	0.011	0.008	0.015	0.017	0.012	0.015	0.014	0.015	0.006	0.014
SO239_24_24_Ophiotholia_Species_1	0.009	0.006	0.008	0.012	0.006	0.009	0.011	0.018	0.011	0.014	0.012	0.011	0.002	0.012	0.008
SO239_50_5_Ophiotholia_Species_1	0.011	0.014	0.012	0.011	0.011	0.008	0.012	0.017	0.015	0.015	0.014	0.015	0.006	0.014	0.009	0.008
SO239_59_3_Ophiotholia_Species_1	0.014	0.009	0.015	0.014	0.006	0.012	0.014	0.021	0.014	0.017	0.015	0.011	0.011	0.014	0.014	0.009	0.014
KU519565.1_NHM_303_Ophiotholia_Species_1	0.014	0.013	0.013	0.011	0.01	0.008	0.011	0.014	0.014	0.014	0.013	0.014	0.006	0.011	0.01	0.008	0.008	0.013
KU519566.1_NHM_371_Ophiotholia_Species_1	0.014	0.013	0.013	0.011	0.01	0.008	0.011	0.014	0.014	0.014	0.013	0.014	0.006	0.011	0.01	0.008	0.008	0.013	0
AB1_EB5_10_4_Amphioplus_daleus_Species_2	0.225	0.228	0.228	0.233	0.228	0.23	0.23	0.233	0.227	0.227	0.23	0.233	0.225	0.227	0.23	0.225	0.228	0.228	0.223	0.223
AB1_EB4_11_17_Amphioplus_daleus_Species_2	0.23	0.233	0.233	0.237	0.233	0.234	0.231	0.237	0.231	0.231	0.234	0.234	0.23	0.231	0.234	0.23	0.233	0.233	0.226	0.226	0.005
AB2_EB2_12_11_Amphioplus_daleus_Species_2	0.227	0.23	0.23	0.235	0.23	0.232	0.229	0.235	0.229	0.229	0.232	0.232	0.227	0.229	0.232	0.227	0.23	0.23	0.223	0.223	0.006	0.005
AB2_EB1_13_26_Amphioplus_daleus_Species_2	0.227	0.23	0.23	0.234	0.23	0.231	0.228	0.234	0.228	0.228	0.231	0.231	0.227	0.228	0.231	0.227	0.23	0.23	0.224	0.224	0.008	0.006	0.008
AB2_EB1_14_3_Amphioplus_daleus_Species_2	0.23	0.233	0.233	0.234	0.233	0.234	0.231	0.236	0.23	0.228	0.234	0.234	0.23	0.231	0.234	0.23	0.233	0.233	0.226	0.226	0.009	0.008	0.009	0.011
AB2_EB2_15_10_Amphioplus_daleus_Species_2	0.228	0.231	0.231	0.236	0.231	0.233	0.23	0.236	0.23	0.23	0.233	0.233	0.228	0.23	0.233	0.228	0.231	0.231	0.224	0.224	0.005	0.003	0.005	0.005	0.008
AB2_EB1_16_13_Amphioplus_daleus_Species_2	0.227	0.23	0.23	0.234	0.23	0.231	0.228	0.234	0.228	0.228	0.231	0.231	0.227	0.228	0.231	0.227	0.23	0.23	0.223	0.223	0.006	0.005	0.006	0.008	0.009	0.005
NODBIO_33_1_Amphioplus_daleus_Species_2	0.227	0.23	0.23	0.234	0.23	0.231	0.231	0.234	0.228	0.228	0.231	0.234	0.227	0.228	0.231	0.227	0.23	0.23	0.223	0.223	0.005	0.006	0.008	0.009	0.011	0.006	0.008
NODBIO_33_18_Amphioplus_daleus_Species_2	0.23	0.233	0.233	0.237	0.233	0.234	0.231	0.237	0.231	0.231	0.234	0.234	0.23	0.231	0.234	0.23	0.233	0.233	0.226	0.226	0.014	0.012	0.014	0.015	0.017	0.012	0.011	0.014
NODBIO_101_1_Amphioplus_daleus_Species_2	0.228	0.231	0.231	0.236	0.231	0.233	0.23	0.236	0.23	0.23	0.233	0.233	0.228	0.23	0.233	0.228	0.231	0.231	0.224	0.224	0.003	0.002	0.003	0.005	0.006	0.002	0.003	0.005	0.011
NODBIO_101_9_Amphioplus_daleus_Species_2	0.228	0.231	0.231	0.236	0.231	0.233	0.23	0.236	0.23	0.23	0.233	0.233	0.228	0.23	0.233	0.228	0.231	0.231	0.226	0.226	0.006	0.005	0.006	0.005	0.009	0.005	0.006	0.008	0.012	0.003
MA13_07_1_Amphioplus_daleus_Species_2	0.228	0.231	0.231	0.236	0.231	0.233	0.23	0.236	0.23	0.23	0.233	0.233	0.228	0.23	0.233	0.228	0.231	0.231	0.224	0.224	0.003	0.002	0.003	0.005	0.006	0.002	0.003	0.005	0.011	0	0.003
MA13_18_3_Amphioplus_daleus_Species_2	0.23	0.233	0.233	0.237	0.233	0.234	0.231	0.237	0.231	0.231	0.234	0.234	0.23	0.231	0.234	0.23	0.233	0.233	0.226	0.226	0.005	0.003	0.005	0.006	0.008	0.003	0.005	0.006	0.012	0.002	0.005	0.002
MA13_85_20_Amphioplus_daleus_Species_2	0.23	0.233	0.233	0.237	0.233	0.234	0.231	0.237	0.231	0.231	0.234	0.234	0.23	0.231	0.234	0.23	0.233	0.233	0.226	0.226	0.005	0.003	0.005	0.006	0.008	0.003	0.005	0.003	0.011	0.002	0.005	0.002	0.003
MA13_90_12_Amphioplus_daleus_Species_2	0.23	0.233	0.233	0.237	0.233	0.234	0.231	0.237	0.231	0.231	0.234	0.234	0.23	0.231	0.234	0.23	0.233	0.233	0.224	0.224	0.006	0.005	0.006	0.008	0.009	0.005	0.003	0.008	0.011	0.003	0.006	0.003	0.005	0.005
MA14_21_6_Amphioplus_daleus_Species_2	0.23	0.233	0.231	0.237	0.233	0.234	0.231	0.237	0.231	0.231	0.234	0.234	0.23	0.231	0.234	0.23	0.233	0.233	0.226	0.226	0.006	0.005	0.006	0.008	0.009	0.005	0.006	0.008	0.014	0.003	0.006	0.003	0.005	0.005	0.006
MA14_38_44_Amphioplus_daleus_Species_2	0.233	0.236	0.233	0.24	0.236	0.237	0.233	0.239	0.234	0.231	0.237	0.236	0.233	0.234	0.236	0.233	0.236	0.236	0.228	0.228	0.017	0.015	0.017	0.018	0.02	0.015	0.017	0.014	0.021	0.014	0.014	0.014	0.015	0.012	0.017	0.017
MA14_66_4_Amphioplus_daleus_Species_2	0.228	0.231	0.231	0.236	0.231	0.233	0.23	0.236	0.23	0.23	0.233	0.233	0.228	0.23	0.233	0.228	0.231	0.231	0.224	0.224	0.005	0.003	0.002	0.006	0.008	0.003	0.005	0.006	0.012	0.002	0.005	0.002	0.003	0.003	0.005	0.005	0.015
MA14_67_8_Amphioplus_daleus_Species_2	0.228	0.231	0.228	0.236	0.231	0.233	0.23	0.236	0.23	0.227	0.233	0.233	0.228	0.23	0.233	0.228	0.231	0.231	0.226	0.226	0.006	0.005	0.006	0.008	0.009	0.005	0.006	0.008	0.014	0.003	0.006	0.003	0.005	0.005	0.006	0.006	0.014	0.005
SO239_20_2_Amphioplus_daleus_Species_2	0.229	0.232	0.232	0.236	0.232	0.233	0.23	0.236	0.23	0.233	0.233	0.233	0.229	0.23	0.233	0.229	0.232	0.232	0.225	0.225	0.008	0.006	0.008	0.008	0.011	0.003	0.008	0.009	0.015	0.005	0.008	0.005	0.006	0.006	0.008	0.008	0.018	0.006	0.008
SO239_24-1_6_Amphioplus_daleus_Species_2	0.231	0.234	0.234	0.239	0.234	0.236	0.233	0.239	0.233	0.233	0.236	0.236	0.231	0.233	0.236	0.231	0.234	0.234	0.228	0.228	0.008	0.006	0.006	0.009	0.011	0.006	0.008	0.009	0.015	0.005	0.008	0.005	0.006	0.006	0.008	0.008	0.018	0.006	0.008	0.008
SO239_24_23_Amphioplus_daleus_Species_2	0.231	0.234	0.234	0.239	0.234	0.236	0.233	0.239	0.233	0.233	0.236	0.236	0.231	0.233	0.236	0.231	0.234	0.234	0.226	0.226	0.006	0.005	0.006	0.008	0.009	0.005	0.006	0.008	0.014	0.003	0.006	0.003	0.005	0.005	0.003	0.006	0.017	0.005	0.006	0.008	0.008
SO239_50_4_Amphioplus_daleus_Species_2	0.23	0.233	0.233	0.237	0.233	0.234	0.231	0.237	0.231	0.231	0.234	0.234	0.23	0.231	0.234	0.23	0.233	0.233	0.226	0.226	0.005	0.003	0.005	0.006	0.008	0.003	0.005	0.005	0.009	0.002	0.005	0.002	0.003	0.002	0.005	0.005	0.014	0.003	0.005	0.006	0.006	0.005
SO239_81_2_Amphioplus_daleus_Species_2	0.228	0.231	0.231	0.236	0.231	0.233	0.23	0.236	0.23	0.23	0.233	0.233	0.228	0.23	0.233	0.228	0.231	0.231	0.224	0.224	0.005	0.003	0.005	0.006	0.008	0.003	0.005	0.006	0.012	0.002	0.005	0.002	0.003	0.003	0.005	0.005	0.015	0.003	0.005	0.006	0.006	0.005	0.003
SO239_81_20_Amphioplus_daleus_Species_2	0.231	0.234	0.234	0.239	0.234	0.236	0.233	0.239	0.233	0.233	0.236	0.236	0.231	0.233	0.236	0.231	0.234	0.234	0.228	0.228	0.006	0.005	0.006	0.005	0.009	0.005	0.006	0.008	0.014	0.003	0.006	0.003	0.005	0.005	0.006	0.006	0.017	0.005	0.006	0.008	0.008	0.006	0.005	0.005
SO239_118_2_Amphioplus_daleus_Species_2	0.227	0.23	0.23	0.234	0.23	0.231	0.228	0.234	0.228	0.228	0.231	0.231	0.227	0.228	0.231	0.227	0.23	0.23	0.223	0.223	0.006	0.005	0.006	0.008	0.009	0.005	0.006	0.008	0.011	0.003	0.006	0.003	0.005	0.005	0.006	0.006	0.017	0.005	0.006	0.008	0.008	0.006	0.005	0.005	0.006
SO239_133_8_Amphioplus_daleus_Species_2	0.228	0.231	0.231	0.236	0.231	0.233	0.23	0.236	0.23	0.23	0.233	0.233	0.228	0.23	0.233	0.228	0.231	0.231	0.224	0.224	0.003	0.002	0.003	0.005	0.006	0.002	0.003	0.005	0.011	0	0.003	0	0.002	0.002	0.003	0.003	0.014	0.002	0.003	0.005	0.005	0.003	0.002	0.002	0.003	0.003
SO239_171_2_Amphioplus_daleus_Species_2	0.23	0.233	0.233	0.237	0.233	0.234	0.231	0.237	0.231	0.231	0.234	0.234	0.23	0.231	0.234	0.23	0.233	0.233	0.226	0.226	0.008	0.006	0.006	0.009	0.008	0.006	0.008	0.009	0.015	0.005	0.008	0.005	0.005	0.006	0.008	0.008	0.018	0.006	0.008	0.008	0.006	0.008	0.006	0.006	0.008	0.008	0.005
SO239_158_1B_Amphioplus_daleus_Species_2	0.227	0.23	0.23	0.234	0.23	0.231	0.228	0.234	0.228	0.228	0.231	0.231	0.227	0.228	0.231	0.227	0.23	0.23	0.223	0.223	0.005	0.003	0.005	0.006	0.008	0.003	0.005	0.006	0.012	0.002	0.005	0.002	0.003	0.003	0.005	0.005	0.015	0.003	0.005	0.006	0.006	0.005	0.003	0.003	0.005	0.005	0.002	0.006
53_053_2_Amphioplus_daleus_Species_2	0.228	0.231	0.231	0.236	0.231	0.233	0.23	0.236	0.23	0.23	0.233	0.233	0.228	0.23	0.233	0.228	0.231	0.231	0.224	0.224	0.003	0.002	0.003	0.005	0.006	0.002	0.003	0.005	0.011	0	0.003	0	0.002	0.002	0.003	0.003	0.014	0.002	0.003	0.005	0.005	0.003	0.002	0.002	0.003	0.003	0	0.005	0.002
SO242_1_181_D4_Amphioplus_daleus_Species_2	0.227	0.23	0.23	0.234	0.23	0.231	0.228	0.234	0.228	0.228	0.231	0.231	0.227	0.228	0.231	0.227	0.23	0.23	0.223	0.223	0.005	0.003	0.005	0.006	0.008	0.003	0.005	0.006	0.012	0.002	0.005	0.002	0.003	0.003	0.005	0.005	0.015	0.003	0.005	0.006	0.006	0.005	0.003	0.003	0.005	0.005	0.002	0.006	0.003
SO242_1_227_D5_Amphioplus_daleus_Species_2	0.224	0.227	0.227	0.231	0.227	0.228	0.225	0.231	0.225	0.225	0.228	0.228	0.224	0.225	0.228	0.224	0.227	0.227	0.22	0.22	0.011	0.009	0.011	0.012	0.014	0.009	0.011	0.012	0.018	0.008	0.011	0.008	0.009	0.009	0.011	0.011	0.021	0.009	0.011	0.012	0.012	0.011	0.009	0.006	0.011	0.011	0.008	0.012	0.009
SO242_1_387_B6_Amphioplus_daleus_Species_2	0.23	0.233	0.233	0.237	0.233	0.234	0.231	0.237	0.231	0.231	0.234	0.234	0.23	0.231	0.234	0.23	0.233	0.233	0.226	0.226	0.005	0.003	0.005	0.006	0.008	0.003	0.005	0.006	0.012	0.002	0.005	0.002	0.003	0.003	0.005	0.005	0.015	0.003	0.005	0.006	0.006	0.005	0.003	0.003	0.005	0.005	0.002	0.006	0.003
KU519544.1_NHM_094_Amphioplus_daleus_Species_2	0.217	0.218	0.218	0.224	0.218	0.22	0.217	0.224	0.217	0.217	0.22	0.22	0.217	0.217	0.22	0.217	0.22	0.218	0.218	0.218	0.002	0.002	0.004	0.004	0.008	0.002	0.002	0.006	0.013	0	0.002	0	0.002	0.002	0.002	0.004	0.011	0.002	0	0.006	0.002	0.002	0.002	0	0.004	0.004	0	0.004	0
KU519545.1_NHM_447_Amphioplus_daleus_Species_2	0.216	0.218	0.218	0.223	0.218	0.22	0.216	0.223	0.216	0.216	0.22	0.22	0.216	0.216	0.22	0.216	0.22	0.218	0.218	0.218	0.002	0.002	0.004	0.004	0.008	0.002	0.002	0.006	0.013	0	0.002	0	0.002	0.002	0.002	0.004	0.011	0.002	0	0.006	0.002	0.002	0.002	0	0.004	0.004	0	0.004	0
SO242_2_222_F2_Ophiosphalma_glabrum_Species_3	0.219	0.222	0.221	0.225	0.218	0.222	0.225	0.228	0.225	0.228	0.227	0.222	0.219	0.225	0.221	0.218	0.221	0.218	0.22	0.22	0.219	0.216	0.213	0.213	0.218	0.216	0.215	0.219	0.216	0.216	0.213	0.216	0.216	0.216	0.218	0.215	0.216	0.215	0.218	0.22	0.218	0.219	0.216	0.215	0.218	0.213	0.216	0.215	0.215
AB1_EB5_10_7_Ophiosphalma_glabrum_Species_3	0.219	0.222	0.221	0.225	0.218	0.222	0.225	0.228	0.225	0.228	0.227	0.222	0.219	0.225	0.221	0.218	0.221	0.221	0.22	0.22	0.212	0.209	0.206	0.205	0.21	0.209	0.207	0.212	0.209	0.209	0.205	0.209	0.209	0.209	0.21	0.207	0.209	0.207	0.21	0.212	0.21	0.212	0.209	0.207	0.21	0.205	0.209	0.207	0.207
AB2_EB1_14_8_Ophiosphalma_glabrum_Species_3	0.221	0.224	0.222	0.224	0.219	0.224	0.224	0.23	0.227	0.23	0.225	0.221	0.221	0.227	0.222	0.219	0.222	0.219	0.221	0.221	0.219	0.216	0.213	0.213	0.218	0.216	0.215	0.219	0.216	0.216	0.213	0.216	0.216	0.216	0.218	0.215	0.216	0.215	0.218	0.22	0.218	0.219	0.216	0.215	0.218	0.213	0.216	0.215	0.215
AB2_EB1_14_13_Ophiosphalma_glabrum_Species_3	0.221	0.224	0.222	0.227	0.219	0.224	0.227	0.23	0.227	0.23	0.228	0.224	0.221	0.227	0.222	0.219	0.222	0.219	0.221	0.221	0.215	0.212	0.209	0.209	0.213	0.212	0.21	0.215	0.212	0.212	0.209	0.212	0.212	0.212	0.213	0.21	0.212	0.21	0.213	0.215	0.213	0.215	0.212	0.21	0.213	0.209	0.212	0.21	0.21
AB2_EB1_13_18_Ophiosphalma_glabrum_Species_3	0.218	0.224	0.222	0.227	0.219	0.224	0.224	0.227	0.227	0.23	0.228	0.224	0.221	0.228	0.222	0.219	0.219	0.219	0.221	0.221	0.219	0.216	0.213	0.213	0.218	0.216	0.215	0.219	0.216	0.216	0.213	0.216	0.216	0.216	0.218	0.215	0.216	0.215	0.218	0.22	0.218	0.219	0.216	0.215	0.218	0.213	0.216	0.215	0.215
AB2_EB1_16_10_Ophiosphalma_glabrum_Species_3	0.219	0.222	0.221	0.222	0.218	0.222	0.222	0.228	0.225	0.228	0.224	0.219	0.219	0.225	0.221	0.218	0.221	0.218	0.22	0.22	0.218	0.215	0.212	0.212	0.216	0.215	0.213	0.218	0.215	0.215	0.212	0.215	0.215	0.215	0.216	0.213	0.215	0.213	0.216	0.218	0.216	0.218	0.215	0.213	0.216	0.212	0.215	0.213	0.213
NODBIO_80_2_Ophiosphalma_glabrum_Species_3	0.222	0.225	0.224	0.228	0.221	0.225	0.228	0.231	0.228	0.231	0.228	0.225	0.222	0.228	0.224	0.221	0.224	0.224	0.223	0.223	0.221	0.218	0.215	0.215	0.219	0.218	0.216	0.221	0.218	0.218	0.215	0.218	0.218	0.218	0.219	0.216	0.218	0.216	0.219	0.221	0.219	0.221	0.218	0.216	0.219	0.215	0.218	0.216	0.216
MA13_07_2_Ophiosphalma_glabrum_Species_3	0.222	0.225	0.224	0.228	0.221	0.225	0.228	0.231	0.228	0.231	0.23	0.225	0.222	0.228	0.224	0.221	0.224	0.221	0.223	0.223	0.222	0.219	0.216	0.216	0.221	0.219	0.218	0.222	0.219	0.219	0.216	0.219	0.219	0.219	0.221	0.218	0.219	0.218	0.221	0.223	0.221	0.222	0.219	0.218	0.221	0.216	0.219	0.218	0.218
MA13_85_7_Ophiosphalma_glabrum_Species_3	0.219	0.222	0.221	0.225	0.218	0.222	0.225	0.228	0.225	0.228	0.227	0.222	0.219	0.225	0.221	0.218	0.221	0.221	0.22	0.22	0.216	0.213	0.21	0.21	0.215	0.213	0.212	0.216	0.213	0.213	0.21	0.213	0.213	0.213	0.215	0.212	0.213	0.212	0.215	0.216	0.215	0.216	0.213	0.212	0.215	0.21	0.213	0.212	0.212
MA13_90_1_Ophiosphalma_glabrum_Species_3	0.219	0.222	0.221	0.222	0.218	0.222	0.222	0.228	0.225	0.228	0.224	0.219	0.219	0.225	0.221	0.218	0.221	0.218	0.22	0.22	0.219	0.216	0.213	0.213	0.218	0.216	0.215	0.219	0.216	0.216	0.213	0.216	0.216	0.216	0.218	0.215	0.216	0.215	0.218	0.22	0.218	0.219	0.216	0.215	0.218	0.213	0.216	0.215	0.215
MA14_21_7_Ophiosphalma_glabrum_Species_3	0.221	0.224	0.222	0.227	0.219	0.224	0.227	0.23	0.227	0.23	0.228	0.224	0.221	0.227	0.222	0.219	0.222	0.222	0.221	0.221	0.218	0.215	0.212	0.212	0.216	0.215	0.213	0.218	0.215	0.215	0.212	0.215	0.215	0.215	0.216	0.213	0.215	0.213	0.216	0.218	0.216	0.218	0.215	0.213	0.216	0.212	0.215	0.213	0.213
MA14_38_12_Ophiosphalma_glabrum_Species_3	0.219	0.222	0.221	0.225	0.218	0.222	0.225	0.228	0.225	0.228	0.227	0.222	0.219	0.225	0.221	0.218	0.221	0.218	0.22	0.22	0.218	0.215	0.212	0.212	0.216	0.215	0.213	0.218	0.215	0.215	0.212	0.215	0.215	0.215	0.216	0.213	0.215	0.213	0.216	0.218	0.216	0.218	0.215	0.213	0.216	0.212	0.215	0.213	0.213
MA14_67_11_Ophiosphalma_glabrum_Species_3	0.221	0.224	0.222	0.227	0.219	0.224	0.227	0.23	0.227	0.23	0.228	0.224	0.221	0.227	0.222	0.219	0.222	0.219	0.22	0.22	0.219	0.216	0.213	0.213	0.218	0.216	0.215	0.219	0.216	0.216	0.213	0.216	0.216	0.216	0.215	0.215	0.216	0.215	0.218	0.22	0.218	0.216	0.216	0.215	0.218	0.213	0.216	0.215	0.215
SO239_20_18_Ophiosphalma_glabrum_Species_3	0.219	0.222	0.221	0.221	0.218	0.222	0.222	0.225	0.225	0.227	0.224	0.219	0.219	0.225	0.221	0.218	0.221	0.221	0.22	0.22	0.218	0.215	0.212	0.212	0.215	0.215	0.213	0.218	0.215	0.215	0.212	0.215	0.215	0.215	0.216	0.213	0.215	0.213	0.216	0.218	0.216	0.218	0.215	0.213	0.216	0.212	0.215	0.213	0.213
SO239_24_4_Ophiosphalma_glabrum_Species_3	0.219	0.222	0.221	0.222	0.218	0.222	0.222	0.228	0.225	0.228	0.224	0.219	0.219	0.225	0.221	0.218	0.221	0.221	0.22	0.22	0.218	0.215	0.212	0.212	0.216	0.215	0.213	0.218	0.215	0.215	0.212	0.215	0.215	0.215	0.216	0.213	0.215	0.213	0.216	0.218	0.216	0.218	0.215	0.213	0.216	0.212	0.215	0.213	0.213
SO239_50_2_Ophiosphalma_glabrum_Species_3	0.221	0.224	0.222	0.224	0.219	0.224	0.224	0.23	0.227	0.23	0.225	0.221	0.221	0.227	0.219	0.219	0.222	0.219	0.221	0.221	0.221	0.218	0.215	0.215	0.219	0.218	0.216	0.221	0.218	0.218	0.215	0.218	0.218	0.218	0.219	0.216	0.218	0.216	0.219	0.221	0.219	0.221	0.218	0.216	0.219	0.215	0.218	0.216	0.216
SO239_59_16_Ophiosphalma_glabrum_Species_3	0.218	0.221	0.219	0.224	0.216	0.221	0.224	0.227	0.224	0.227	0.225	0.221	0.218	0.224	0.219	0.216	0.219	0.219	0.218	0.218	0.219	0.216	0.213	0.213	0.218	0.216	0.215	0.219	0.216	0.216	0.213	0.216	0.216	0.216	0.218	0.215	0.216	0.215	0.218	0.22	0.218	0.219	0.216	0.215	0.218	0.213	0.216	0.215	0.215
SO239_81_8_Ophiosphalma_glabrum_Species_3	0.219	0.222	0.221	0.222	0.218	0.222	0.222	0.228	0.225	0.228	0.224	0.219	0.219	0.225	0.221	0.218	0.221	0.218	0.22	0.22	0.219	0.216	0.213	0.213	0.218	0.216	0.215	0.219	0.216	0.216	0.213	0.216	0.216	0.216	0.218	0.215	0.216	0.215	0.218	0.22	0.218	0.219	0.216	0.215	0.218	0.213	0.216	0.215	0.215
SO239_118_15_Ophiosphalma_glabrum_Species_3	0.221	0.224	0.222	0.224	0.219	0.224	0.224	0.23	0.227	0.23	0.225	0.221	0.221	0.227	0.222	0.219	0.222	0.219	0.221	0.221	0.221	0.218	0.215	0.215	0.219	0.218	0.216	0.221	0.218	0.218	0.215	0.218	0.218	0.218	0.219	0.216	0.218	0.216	0.219	0.221	0.219	0.221	0.218	0.216	0.219	0.215	0.218	0.216	0.216
SO239_128_Ophiosphalma_glabrum_Species_3	0.221	0.224	0.222	0.224	0.219	0.224	0.224	0.23	0.227	0.23	0.225	0.221	0.221	0.227	0.222	0.219	0.222	0.219	0.221	0.221	0.219	0.216	0.213	0.213	0.218	0.216	0.215	0.219	0.216	0.216	0.213	0.216	0.216	0.216	0.218	0.215	0.216	0.215	0.218	0.22	0.218	0.219	0.216	0.215	0.218	0.213	0.216	0.215	0.215
SO239_132_Ophiosphalma_glabrum_Species_3	0.221	0.224	0.222	0.224	0.219	0.224	0.224	0.23	0.227	0.23	0.225	0.221	0.221	0.227	0.222	0.219	0.222	0.219	0.221	0.221	0.219	0.216	0.213	0.213	0.218	0.216	0.215	0.219	0.216	0.216	0.213	0.216	0.216	0.216	0.218	0.215	0.216	0.215	0.218	0.22	0.218	0.219	0.216	0.215	0.218	0.213	0.216	0.215	0.215
SO239_131_1_Ophiosphalma_glabrum_Species_3	0.218	0.221	0.219	0.221	0.216	0.221	0.221	0.224	0.224	0.23	0.222	0.218	0.218	0.224	0.219	0.216	0.219	0.216	0.218	0.218	0.219	0.216	0.213	0.213	0.218	0.216	0.215	0.219	0.216	0.216	0.213	0.216	0.216	0.216	0.218	0.215	0.216	0.215	0.218	0.216	0.215	0.219	0.216	0.215	0.218	0.213	0.216	0.215	0.215
SO239_410_Ophiosphalma_glabrum_Species_3	0.219	0.222	0.221	0.225	0.218	0.222	0.225	0.228	0.225	0.228	0.227	0.222	0.219	0.225	0.221	0.218	0.221	0.218	0.22	0.22	0.216	0.213	0.21	0.21	0.215	0.213	0.212	0.216	0.213	0.213	0.21	0.213	0.213	0.213	0.215	0.212	0.213	0.212	0.215	0.216	0.215	0.216	0.213	0.212	0.215	0.21	0.213	0.212	0.212
674_new_Ophiosphalma_glabrum_Species_3	0.218	0.221	0.22	0.224	0.216	0.221	0.224	0.227	0.224	0.227	0.226	0.221	0.218	0.224	0.22	0.216	0.22	0.216	0.218	0.218	0.215	0.212	0.209	0.209	0.213	0.212	0.21	0.215	0.212	0.212	0.209	0.212	0.212	0.212	0.213	0.21	0.212	0.21	0.213	0.215	0.213	0.215	0.212	0.21	0.213	0.209	0.212	0.21	0.21
SO239_686_Ophiosphalma_glabrum_Species_3	0.218	0.221	0.219	0.224	0.216	0.221	0.224	0.227	0.224	0.227	0.225	0.221	0.218	0.224	0.219	0.216	0.219	0.216	0.218	0.218	0.215	0.212	0.209	0.209	0.213	0.212	0.21	0.215	0.212	0.212	0.209	0.212	0.212	0.212	0.213	0.21	0.212	0.21	0.213	0.215	0.213	0.215	0.212	0.21	0.213	0.209	0.212	0.21	0.21
SO239_2011_Ophiosphalma_glabrum_Species_3	0.219	0.222	0.221	0.225	0.218	0.222	0.225	0.228	0.225	0.228	0.227	0.222	0.219	0.225	0.221	0.218	0.221	0.218	0.22	0.22	0.219	0.216	0.213	0.213	0.218	0.216	0.215	0.219	0.216	0.216	0.213	0.216	0.216	0.216	0.218	0.215	0.216	0.215	0.218	0.22	0.218	0.219	0.216	0.215	0.218	0.213	0.216	0.215	0.215
2015_new_Ophiosphalma_glabrum_Species_3	0.216	0.22	0.218	0.223	0.215	0.22	0.223	0.226	0.223	0.226	0.224	0.22	0.216	0.223	0.218	0.215	0.218	0.215	0.217	0.217	0.215	0.212	0.209	0.209	0.213	0.212	0.21	0.215	0.212	0.212	0.209	0.212	0.212	0.212	0.213	0.21	0.212	0.21	0.213	0.215	0.213	0.215	0.212	0.21	0.213	0.209	0.212	0.21	0.21
KU519552.1_NHM_009_Ophiosphalma_glabrum_Species_3	0.215	0.216	0.216	0.22	0.212	0.216	0.22	0.223	0.22	0.223	0.221	0.216	0.215	0.218	0.215	0.213	0.216	0.212	0.218	0.218	0.218	0.216	0.214	0.215	0.218	0.216	0.215	0.22	0.216	0.216	0.215	0.216	0.215	0.216	0.216	0.215	0.216	0.215	0.218	0.22	0.218	0.218	0.216	0.215	0.218	0.213	0.216	0.216	0.215
KU519553.1_NHM_124_Ophiosphalma_glabrum_Species_3	0.222	0.223	0.222	0.227	0.218	0.223	0.227	0.23	0.227	0.227	0.229	0.223	0.222	0.225	0.222	0.22	0.223	0.218	0.225	0.225	0.218	0.216	0.213	0.215	0.218	0.216	0.216	0.22	0.216	0.216	0.215	0.216	0.216	0.216	0.216	0.215	0.216	0.215	0.216	0.22	0.216	0.218	0.216	0.216	0.218	0.213	0.216	0.213	0.215
KU519554.1_NHM_256_Ophiosphalma_glabrum_Species_3	0.216	0.218	0.218	0.221	0.213	0.218	0.221	0.224	0.221	0.224	0.223	0.218	0.216	0.22	0.216	0.215	0.218	0.213	0.22	0.22	0.216	0.215	0.212	0.213	0.216	0.215	0.213	0.218	0.215	0.215	0.213	0.215	0.215	0.215	0.215	0.213	0.215	0.213	0.216	0.218	0.216	0.216	0.215	0.213	0.216	0.212	0.215	0.213	0.213
KU519555.1_NHM_329_Ophiosphalma_glabrum_Species_3	0.22	0.223	0.222	0.226	0.219	0.223	0.226	0.229	0.226	0.229	0.228	0.223	0.22	0.226	0.222	0.219	0.222	0.219	0.221	0.221	0.217	0.214	0.211	0.211	0.216	0.214	0.213	0.217	0.214	0.214	0.211	0.214	0.214	0.214	0.216	0.213	0.216	0.213	0.216	0.217	0.214	0.217	0.214	0.213	0.216	0.211	0.214	0.211	0.213
KU519556.1_NHM_335_Ophiosphalma_glabrum_Species_3	0.219	0.222	0.221	0.225	0.218	0.222	0.225	0.228	0.225	0.228	0.227	0.222	0.219	0.225	0.221	0.218	0.221	0.218	0.22	0.22	0.218	0.215	0.212	0.212	0.216	0.215	0.213	0.218	0.215	0.215	0.212	0.215	0.215	0.215	0.216	0.213	0.215	0.213	0.216	0.218	0.216	0.218	0.215	0.213	0.216	0.212	0.215	0.213	0.213
KU519557.1_NHM_415_Ophiosphalma_glabrum_Species_3	0.219	0.222	0.221	0.222	0.218	0.222	0.222	0.228	0.225	0.228	0.224	0.219	0.219	0.225	0.221	0.218	0.221	0.218	0.22	0.22	0.219	0.216	0.213	0.213	0.218	0.216	0.215	0.219	0.216	0.216	0.213	0.216	0.216	0.216	0.218	0.215	0.216	0.215	0.218	0.22	0.218	0.219	0.216	0.215	0.218	0.213	0.216	0.215	0.215
KU519558.1_NHM_452_Ophiosphalma_glabrum_Species_3	0.219	0.222	0.221	0.222	0.218	0.222	0.222	0.228	0.225	0.228	0.224	0.219	0.219	0.225	0.221	0.218	0.221	0.218	0.22	0.22	0.219	0.216	0.213	0.213	0.218	0.216	0.215	0.219	0.216	0.216	0.213	0.216	0.216	0.216	0.218	0.215	0.216	0.215	0.218	0.22	0.218	0.219	0.216	0.215	0.218	0.213	0.216	0.215	0.215
AB1_EB3_9_5_Amphioplus_cf_daleus_Species_4	0.232	0.231	0.229	0.232	0.231	0.232	0.227	0.235	0.229	0.226	0.229	0.229	0.231	0.229	0.227	0.231	0.235	0.227	0.228	0.228	0.093	0.089	0.093	0.087	0.096	0.089	0.089	0.092	0.092	0.09	0.087	0.09	0.09	0.092	0.092	0.09	0.093	0.092	0.09	0.092	0.095	0.093	0.092	0.089	0.09	0.09	0.09	0.093	0.092
AB2_EB1_14_27_Amphioplus_cf_daleus_Species_4	0.248	0.244	0.244	0.247	0.245	0.247	0.244	0.25	0.244	0.24	0.244	0.244	0.245	0.244	0.242	0.245	0.25	0.245	0.24	0.24	0.11	0.105	0.11	0.104	0.113	0.105	0.108	0.107	0.105	0.107	0.104	0.107	0.107	0.107	0.108	0.104	0.108	0.108	0.107	0.108	0.111	0.11	0.105	0.105	0.107	0.107	0.107	0.108	0.108
SO242_1_252_Ophiuroidea_sp1_Species_5	0.236	0.233	0.23	0.236	0.233	0.236	0.231	0.227	0.234	0.233	0.234	0.233	0.231	0.234	0.236	0.231	0.234	0.236	0.236	0.236	0.222	0.219	0.216	0.218	0.221	0.219	0.219	0.221	0.219	0.219	0.222	0.219	0.219	0.219	0.219	0.221	0.216	0.218	0.218	0.22	0.222	0.222	0.219	0.218	0.219	0.216	0.219	0.222	0.221
SO242_1_181_D3_Amphilepis_sp_Species_5	0.236	0.233	0.23	0.236	0.233	0.236	0.231	0.227	0.234	0.233	0.234	0.233	0.231	0.236	0.236	0.231	0.234	0.236	0.236	0.236	0.218	0.215	0.212	0.213	0.216	0.215	0.215	0.216	0.215	0.215	0.218	0.215	0.215	0.215	0.215	0.216	0.212	0.213	0.213	0.215	0.218	0.218	0.215	0.213	0.215	0.212	0.215	0.218	0.216
MA13_18_8_Amphilepis_sp_Species_5	0.236	0.233	0.23	0.236	0.233	0.236	0.231	0.227	0.233	0.233	0.234	0.233	0.231	0.234	0.236	0.231	0.234	0.236	0.236	0.236	0.219	0.216	0.213	0.215	0.218	0.216	0.216	0.218	0.216	0.216	0.219	0.216	0.216	0.216	0.216	0.218	0.213	0.215	0.215	0.216	0.219	0.219	0.216	0.215	0.216	0.213	0.216	0.219	0.218
MA13_85_32_Amphilepis_sp_Species_5	0.239	0.236	0.233	0.236	0.236	0.239	0.234	0.23	0.237	0.236	0.237	0.237	0.234	0.237	0.239	0.234	0.237	0.239	0.239	0.239	0.219	0.216	0.213	0.215	0.218	0.216	0.216	0.218	0.219	0.216	0.219	0.216	0.216	0.216	0.216	0.218	0.216	0.215	0.215	0.216	0.219	0.219	0.216	0.215	0.216	0.213	0.216	0.219	0.218
MA13_90_09_Amphilepis_sp_Species_5	0.237	0.234	0.231	0.237	0.234	0.237	0.233	0.228	0.236	0.234	0.236	0.234	0.233	0.236	0.237	0.233	0.236	0.237	0.237	0.237	0.216	0.213	0.21	0.212	0.215	0.213	0.21	0.215	0.216	0.213	0.216	0.213	0.213	0.213	0.213	0.215	0.21	0.212	0.212	0.213	0.216	0.216	0.213	0.212	0.213	0.21	0.213	0.216	0.215
MA14_39_9_Amphilepis_sp_Species_5	0.239	0.236	0.233	0.239	0.236	0.239	0.234	0.23	0.237	0.236	0.237	0.237	0.234	0.237	0.239	0.234	0.237	0.239	0.239	0.239	0.219	0.216	0.213	0.215	0.218	0.216	0.216	0.218	0.219	0.216	0.219	0.216	0.216	0.216	0.216	0.218	0.216	0.215	0.215	0.216	0.219	0.219	0.216	0.215	0.216	0.213	0.216	0.219	0.218
SO242_2_222_F1_Ophiuroglypha_cf_polyacantha_Species_6	0.251	0.256	0.256	0.256	0.254	0.256	0.25	0.254	0.256	0.253	0.254	0.254	0.256	0.253	0.256	0.256	0.253	0.257	0.252	0.252	0.225	0.225	0.227	0.225	0.231	0.225	0.227	0.227	0.225	0.225	0.225	0.225	0.224	0.224	0.227	0.225	0.225	0.225	0.227	0.229	0.227	0.228	0.225	0.224	0.225	0.225	0.225	0.228	0.227
AB2_EB2_12_6_Ophiuroglypha_cf_polyacantha_Species_6	0.253	0.257	0.257	0.257	0.256	0.257	0.251	0.256	0.254	0.254	0.256	0.253	0.257	0.254	0.254	0.257	0.254	0.259	0.253	0.253	0.227	0.227	0.229	0.227	0.233	0.227	0.228	0.228	0.227	0.227	0.227	0.227	0.225	0.225	0.228	0.227	0.227	0.227	0.228	0.23	0.228	0.23	0.227	0.225	0.227	0.227	0.227	0.23	0.228
AB2_EB2_12_8_Ophiuroglypha_cf_polyacantha_Species_6	0.251	0.256	0.256	0.256	0.254	0.256	0.25	0.254	0.253	0.253	0.254	0.251	0.256	0.253	0.253	0.256	0.253	0.257	0.252	0.252	0.225	0.225	0.227	0.225	0.231	0.225	0.227	0.227	0.225	0.225	0.225	0.225	0.224	0.224	0.227	0.225	0.225	0.225	0.227	0.229	0.227	0.228	0.225	0.224	0.225	0.225	0.225	0.228	0.227
AB2_EB2_15_7_Ophiuroglypha_cf_polyacantha_Species_6	0.248	0.253	0.253	0.253	0.251	0.253	0.247	0.251	0.25	0.25	0.251	0.248	0.253	0.25	0.253	0.253	0.25	0.254	0.248	0.248	0.224	0.224	0.226	0.224	0.23	0.224	0.225	0.225	0.224	0.224	0.224	0.224	0.222	0.222	0.225	0.224	0.224	0.224	0.225	0.227	0.225	0.227	0.224	0.222	0.224	0.224	0.224	0.227	0.225
AB2_EB1_16_6_Ophiuroglypha_cf_polyacantha_Species_6	0.251	0.256	0.256	0.256	0.254	0.256	0.25	0.254	0.253	0.253	0.254	0.251	0.256	0.253	0.256	0.256	0.253	0.257	0.252	0.252	0.224	0.224	0.226	0.224	0.23	0.224	0.225	0.225	0.224	0.224	0.224	0.224	0.222	0.222	0.225	0.224	0.224	0.224	0.225	0.227	0.225	0.227	0.224	0.222	0.224	0.224	0.224	0.227	0.225
AB2_EB1_16_7_Ophiuroglypha_cf_polyacantha_Species_6	0.251	0.256	0.256	0.256	0.254	0.256	0.25	0.254	0.253	0.253	0.254	0.251	0.256	0.253	0.256	0.256	0.253	0.257	0.252	0.252	0.224	0.224	0.226	0.224	0.23	0.224	0.225	0.225	0.224	0.224	0.224	0.224	0.222	0.222	0.225	0.224	0.224	0.224	0.225	0.227	0.225	0.227	0.224	0.222	0.224	0.224	0.224	0.227	0.225
MA14_20_5_Ophiuroglypha_cf_polyacantha_Species_6	0.251	0.256	0.256	0.256	0.254	0.256	0.25	0.254	0.253	0.253	0.254	0.251	0.256	0.253	0.256	0.256	0.253	0.257	0.252	0.252	0.225	0.225	0.227	0.225	0.231	0.225	0.227	0.227	0.225	0.225	0.225	0.225	0.224	0.224	0.227	0.225	0.224	0.225	0.227	0.228	0.225	0.228	0.225	0.224	0.225	0.225	0.225	0.227	0.227
MA14_38_3_Ophiuroglypha_cf_polyacantha_Species_6	0.253	0.257	0.257	0.257	0.256	0.257	0.251	0.256	0.254	0.254	0.256	0.253	0.257	0.254	0.257	0.257	0.254	0.259	0.253	0.253	0.224	0.224	0.226	0.224	0.23	0.224	0.225	0.225	0.224	0.224	0.224	0.224	0.222	0.222	0.225	0.224	0.224	0.224	0.225	0.227	0.225	0.227	0.224	0.222	0.224	0.224	0.224	0.227	0.225
MA14_66_7_Ophiuroglypha_cf_polyacantha_Species_6	0.253	0.258	0.258	0.258	0.256	0.258	0.252	0.256	0.255	0.255	0.256	0.253	0.258	0.255	0.258	0.258	0.255	0.259	0.254	0.254	0.226	0.226	0.226	0.226	0.232	0.226	0.227	0.227	0.226	0.226	0.226	0.226	0.224	0.224	0.227	0.226	0.226	0.226	0.227	0.227	0.224	0.229	0.226	0.224	0.226	0.226	0.226	0.226	0.227
SO239_20_19_Ophiuroglypha_cf_polyacantha_Species_6	0.25	0.254	0.254	0.254	0.253	0.254	0.248	0.253	0.254	0.251	0.253	0.253	0.254	0.251	0.254	0.254	0.251	0.256	0.25	0.25	0.224	0.224	0.226	0.224	0.23	0.224	0.225	0.225	0.224	0.224	0.224	0.224	0.222	0.222	0.225	0.224	0.224	0.224	0.225	0.227	0.225	0.227	0.224	0.222	0.224	0.224	0.224	0.227	0.225
SO242_2_176_F8_Ophiura_sp_Species_7	0.227	0.234	0.236	0.237	0.234	0.234	0.228	0.239	0.23	0.233	0.234	0.231	0.233	0.231	0.233	0.233	0.231	0.237	0.234	0.234	0.209	0.209	0.21	0.207	0.212	0.209	0.21	0.21	0.205	0.209	0.21	0.209	0.207	0.207	0.21	0.21	0.216	0.209	0.21	0.21	0.207	0.212	0.209	0.207	0.209	0.205	0.209	0.212	0.21
SO239_59_10_Ophiopyrgidae_sp_Species_8	0.219	0.218	0.222	0.222	0.222	0.222	0.221	0.222	0.215	0.216	0.224	0.221	0.218	0.219	0.218	0.218	0.218	0.218	0.218	0.218	0.23	0.233	0.232	0.228	0.231	0.233	0.231	0.231	0.227	0.233	0.231	0.233	0.233	0.233	0.233	0.234	0.231	0.233	0.234	0.236	0.233	0.236	0.233	0.231	0.23	0.23	0.233	0.234	0.234
2059_new_Ophiuroglypha_sp_Species_9	0.199	0.204	0.204	0.207	0.204	0.205	0.205	0.204	0.204	0.201	0.204	0.205	0.202	0.201	0.202	0.202	0.204	0.209	0.2	0.2	0.23	0.23	0.229	0.225	0.228	0.23	0.228	0.228	0.23	0.23	0.23	0.23	0.23	0.231	0.231	0.231	0.233	0.23	0.228	0.232	0.231	0.233	0.231	0.231	0.23	0.23	0.23	0.23	0.231
2063_new_Ophiuroglypha_sp_Species_9	0.198	0.201	0.201	0.203	0.201	0.201	0.203	0.199	0.201	0.198	0.201	0.203	0.201	0.199	0.198	0.201	0.201	0.206	0.199	0.199	0.231	0.232	0.231	0.229	0.231	0.232	0.231	0.231	0.232	0.232	0.234	0.232	0.232	0.234	0.232	0.234	0.236	0.232	0.231	0.234	0.234	0.234	0.234	0.234	0.229	0.232	0.232	0.232	0.232
2074_new_Ophiuroglypha_sp_Species_9	0.202	0.207	0.207	0.21	0.207	0.209	0.209	0.21	0.207	0.204	0.207	0.207	0.205	0.204	0.205	0.205	0.207	0.212	0.204	0.204	0.237	0.237	0.236	0.233	0.236	0.237	0.236	0.236	0.237	0.237	0.237	0.237	0.237	0.239	0.239	0.239	0.237	0.237	0.236	0.239	0.239	0.24	0.239	0.239	0.234	0.237	0.237	0.237	0.239
2078_new_Ophiuroglypha_sp_Species_9	0.204	0.209	0.209	0.212	0.209	0.21	0.21	0.209	0.209	0.205	0.209	0.21	0.207	0.205	0.207	0.207	0.209	0.213	0.202	0.202	0.234	0.234	0.233	0.23	0.233	0.234	0.233	0.231	0.231	0.234	0.234	0.234	0.234	0.234	0.236	0.236	0.236	0.234	0.233	0.236	0.236	0.237	0.233	0.236	0.231	0.234	0.234	0.233	0.236
SO239_2080_Ophiuroglypha_sp_Species_9	0.201	0.205	0.205	0.209	0.205	0.207	0.207	0.205	0.205	0.202	0.205	0.207	0.204	0.202	0.204	0.204	0.205	0.21	0.202	0.202	0.233	0.233	0.232	0.228	0.231	0.233	0.231	0.231	0.233	0.233	0.233	0.233	0.233	0.234	0.234	0.234	0.236	0.233	0.231	0.235	0.234	0.236	0.234	0.234	0.23	0.233	0.233	0.233	0.234
SO239_2082_Ophiuroglypha_sp_Species_9	0.198	0.202	0.202	0.205	0.202	0.204	0.204	0.205	0.202	0.199	0.202	0.204	0.201	0.199	0.201	0.201	0.202	0.207	0.199	0.199	0.231	0.231	0.23	0.227	0.23	0.231	0.23	0.23	0.231	0.231	0.231	0.231	0.231	0.233	0.233	0.233	0.234	0.231	0.23	0.233	0.233	0.234	0.233	0.233	0.228	0.231	0.231	0.231	0.233
SO239_2084_Ophiuroglypha_sp_Species_9	0.203	0.204	0.207	0.206	0.204	0.206	0.206	0.206	0.204	0.203	0.204	0.206	0.203	0.201	0.203	0.203	0.204	0.209	0.201	0.201	0.232	0.232	0.23	0.227	0.229	0.232	0.23	0.23	0.232	0.232	0.232	0.232	0.232	0.233	0.233	0.233	0.238	0.232	0.233	0.233	0.232	0.235	0.233	0.233	0.229	0.232	0.232	0.23	0.233
SO239_2085_Ophiuroglypha_sp_Species_9	0.198	0.202	0.202	0.205	0.202	0.204	0.204	0.205	0.202	0.199	0.202	0.204	0.201	0.199	0.201	0.201	0.202	0.207	0.199	0.199	0.233	0.233	0.232	0.228	0.231	0.233	0.231	0.231	0.233	0.233	0.233	0.233	0.233	0.234	0.234	0.234	0.236	0.233	0.231	0.235	0.234	0.236	0.234	0.234	0.233	0.233	0.233	0.233	0.234
SO239_2086_Ophiuroglypha_sp_Species_9	0.196	0.201	0.201	0.204	0.201	0.202	0.202	0.201	0.201	0.198	0.201	0.202	0.199	0.198	0.199	0.199	0.201	0.205	0.199	0.199	0.233	0.233	0.232	0.228	0.231	0.233	0.231	0.231	0.233	0.233	0.233	0.233	0.233	0.234	0.234	0.234	0.236	0.233	0.231	0.235	0.234	0.236	0.234	0.234	0.23	0.233	0.233	0.233	0.234
SO239_2087_Ophiuroglypha_sp_Species_9	0.201	0.205	0.204	0.209	0.202	0.207	0.207	0.205	0.205	0.202	0.205	0.207	0.204	0.202	0.204	0.204	0.205	0.207	0.202	0.202	0.236	0.236	0.235	0.231	0.234	0.236	0.234	0.234	0.236	0.236	0.236	0.236	0.236	0.237	0.237	0.237	0.239	0.236	0.234	0.238	0.237	0.239	0.237	0.237	0.233	0.236	0.236	0.236	0.237
2088_new_Ophiuroglypha_Species_9	0.201	0.205	0.205	0.209	0.205	0.207	0.207	0.205	0.205	0.202	0.205	0.207	0.204	0.202	0.204	0.204	0.207	0.21	0.202	0.202	0.233	0.233	0.232	0.228	0.231	0.233	0.231	0.231	0.233	0.233	0.233	0.233	0.233	0.234	0.234	0.234	0.236	0.233	0.231	0.235	0.234	0.236	0.234	0.234	0.23	0.233	0.233	0.233	0.234
SO239_2091_Ophiuroglypha_sp_Species_9	0.204	0.209	0.209	0.212	0.209	0.21	0.21	0.209	0.209	0.205	0.209	0.21	0.207	0.205	0.207	0.207	0.209	0.213	0.202	0.202	0.231	0.231	0.23	0.227	0.23	0.231	0.233	0.23	0.231	0.231	0.231	0.231	0.231	0.233	0.233	0.233	0.234	0.231	0.23	0.233	0.233	0.234	0.233	0.233	0.228	0.231	0.231	0.231	0.233
SO239_2093_Ophiuroglypha_sp_Species_9	0.198	0.202	0.201	0.205	0.199	0.204	0.204	0.202	0.202	0.199	0.202	0.204	0.201	0.201	0.201	0.201	0.202	0.204	0.199	0.199	0.231	0.231	0.229	0.227	0.23	0.231	0.23	0.23	0.231	0.231	0.231	0.231	0.231	0.233	0.233	0.233	0.234	0.231	0.23	0.232	0.23	0.234	0.233	0.233	0.231	0.231	0.231	0.228	0.233
2092_new_Ophiuroglypha_sp_Species_9	0.201	0.204	0.204	0.209	0.205	0.207	0.207	0.205	0.204	0.202	0.205	0.207	0.202	0.202	0.202	0.202	0.205	0.21	0.202	0.202	0.231	0.231	0.23	0.227	0.23	0.231	0.23	0.23	0.231	0.231	0.231	0.231	0.231	0.233	0.233	0.233	0.234	0.231	0.23	0.233	0.233	0.234	0.233	0.233	0.228	0.231	0.231	0.231	0.233
SO239_396_Anophiura_sp_Species_10	0.209	0.212	0.215	0.213	0.213	0.213	0.207	0.21	0.21	0.213	0.212	0.21	0.21	0.21	0.215	0.21	0.21	0.213	0.21	0.21	0.215	0.212	0.211	0.213	0.213	0.213	0.21	0.212	0.216	0.212	0.215	0.212	0.212	0.212	0.213	0.213	0.213	0.212	0.213	0.214	0.213	0.215	0.212	0.212	0.212	0.212	0.212	0.21	0.213
SO239_395_Ophiuroglypha_sp_Species_11	0.207	0.207	0.205	0.213	0.207	0.212	0.215	0.215	0.202	0.204	0.209	0.21	0.205	0.204	0.212	0.205	0.209	0.207	0.208	0.208	0.212	0.212	0.21	0.21	0.213	0.212	0.212	0.21	0.213	0.212	0.212	0.212	0.212	0.21	0.213	0.213	0.21	0.212	0.21	0.213	0.212	0.215	0.212	0.213	0.212	0.209	0.212	0.21	0.213
SO239_2113_Asteroschema_sp_Species_12	0.222	0.231	0.225	0.231	0.227	0.23	0.23	0.224	0.228	0.225	0.23	0.231	0.227	0.231	0.228	0.227	0.225	0.228	0.231	0.231	0.213	0.216	0.215	0.218	0.216	0.215	0.216	0.215	0.213	0.216	0.216	0.216	0.218	0.216	0.218	0.218	0.209	0.216	0.213	0.218	0.216	0.219	0.216	0.218	0.218	0.213	0.216	0.218	0.218
KU519567.1_Perlophiura_profundissima_Species_13	0.219	0.216	0.212	0.218	0.215	0.216	0.218	0.216	0.218	0.222	0.221	0.213	0.215	0.224	0.213	0.213	0.219	0.215	0.22	0.22	0.224	0.221	0.22	0.221	0.221	0.222	0.221	0.219	0.222	0.221	0.218	0.221	0.222	0.219	0.222	0.222	0.216	0.221	0.219	0.223	0.222	0.224	0.221	0.219	0.222	0.221	0.221	0.222	0.222
SO242_1_387_A7_Perlophiura_profundissima_Species_13	0.222	0.219	0.215	0.221	0.218	0.219	0.221	0.219	0.221	0.222	0.224	0.216	0.218	0.227	0.216	0.216	0.222	0.218	0.223	0.223	0.222	0.219	0.218	0.219	0.219	0.221	0.219	0.218	0.221	0.219	0.216	0.219	0.221	0.218	0.221	0.221	0.215	0.219	0.218	0.224	0.221	0.222	0.219	0.218	0.221	0.219	0.219	0.221	0.221
SO239_59_18_Ophiuroglypha_sp_Species_14	0.219	0.222	0.222	0.224	0.221	0.225	0.218	0.221	0.219	0.221	0.221	0.221	0.221	0.221	0.222	0.221	0.221	0.222	0.221	0.221	0.196	0.196	0.195	0.192	0.199	0.196	0.195	0.199	0.196	0.196	0.193	0.196	0.198	0.196	0.198	0.198	0.196	0.196	0.198	0.2	0.196	0.198	0.196	0.195	0.196	0.193	0.196	0.201	0.198
SO239_197_2_Ophiophyllum_sp_Species_15	0.207	0.207	0.21	0.213	0.206	0.21	0.21	0.212	0.203	0.207	0.207	0.207	0.207	0.209	0.209	0.207	0.213	0.209	0.204	0.204	0.201	0.201	0.2	0.206	0.203	0.203	0.201	0.203	0.203	0.201	0.201	0.201	0.203	0.203	0.203	0.203	0.201	0.201	0.203	0.206	0.203	0.204	0.203	0.2	0.204	0.198	0.201	0.206	0.203
SO239_139_1_Ophiophyllum_sp_Species_15	0.209	0.209	0.212	0.215	0.207	0.212	0.212	0.213	0.204	0.209	0.209	0.209	0.209	0.21	0.21	0.209	0.215	0.21	0.204	0.204	0.201	0.201	0.2	0.205	0.202	0.202	0.201	0.202	0.202	0.201	0.201	0.201	0.202	0.202	0.202	0.202	0.201	0.201	0.204	0.206	0.202	0.204	0.202	0.199	0.204	0.198	0.201	0.205	0.202
AB1_EB5_10_11_Amphiophiura_bullata_Species_16	0.21	0.213	0.215	0.213	0.213	0.216	0.215	0.213	0.209	0.216	0.213	0.216	0.213	0.216	0.216	0.213	0.212	0.213	0.22	0.22	0.21	0.213	0.212	0.215	0.21	0.213	0.213	0.212	0.212	0.213	0.213	0.213	0.212	0.215	0.215	0.215	0.219	0.213	0.215	0.213	0.213	0.216	0.215	0.212	0.216	0.21	0.213	0.213	0.215
AB1_EB4_11_9_Amphiophiura_bullata_Species_16	0.212	0.215	0.216	0.215	0.215	0.218	0.216	0.215	0.21	0.218	0.215	0.218	0.215	0.218	0.218	0.215	0.213	0.215	0.221	0.221	0.21	0.213	0.212	0.215	0.21	0.213	0.213	0.212	0.212	0.213	0.213	0.213	0.212	0.215	0.215	0.215	0.219	0.213	0.215	0.213	0.213	0.216	0.215	0.212	0.216	0.21	0.213	0.213	0.215
MA13_90_16_Amphiophiura_bullata_Species_16	0.215	0.215	0.216	0.215	0.215	0.218	0.216	0.215	0.21	0.218	0.215	0.218	0.215	0.218	0.218	0.215	0.213	0.215	0.218	0.218	0.209	0.209	0.208	0.21	0.206	0.209	0.209	0.207	0.207	0.209	0.209	0.209	0.207	0.21	0.21	0.21	0.212	0.209	0.21	0.209	0.209	0.212	0.21	0.207	0.212	0.206	0.209	0.209	0.21
NODBIO_80_1_Amphiophiura_bullata_Species_16	0.209	0.212	0.213	0.212	0.212	0.215	0.213	0.212	0.207	0.215	0.212	0.215	0.212	0.215	0.215	0.212	0.21	0.212	0.218	0.218	0.209	0.212	0.211	0.213	0.209	0.212	0.212	0.21	0.21	0.212	0.212	0.212	0.21	0.213	0.213	0.213	0.218	0.212	0.213	0.212	0.212	0.215	0.213	0.21	0.215	0.209	0.212	0.212	0.213
SO239_118_5_Amphiophiura_bullata_Species_16	0.215	0.218	0.219	0.218	0.218	0.221	0.219	0.218	0.213	0.221	0.218	0.221	0.218	0.221	0.221	0.218	0.216	0.218	0.224	0.224	0.212	0.215	0.213	0.216	0.212	0.215	0.215	0.213	0.213	0.215	0.215	0.215	0.213	0.216	0.216	0.216	0.221	0.215	0.216	0.215	0.215	0.218	0.216	0.213	0.218	0.212	0.215	0.215	0.216
SO239_118_12_Amphiophiura_bullata_Species_16	0.212	0.215	0.216	0.215	0.215	0.218	0.216	0.215	0.21	0.218	0.215	0.218	0.215	0.218	0.218	0.215	0.213	0.215	0.221	0.221	0.21	0.213	0.212	0.215	0.21	0.213	0.213	0.212	0.212	0.213	0.213	0.213	0.212	0.215	0.215	0.215	0.219	0.213	0.215	0.213	0.213	0.216	0.215	0.212	0.216	0.21	0.213	0.213	0.215
SO239_118_13_Amphiophiura_bullata_Species_16	0.209	0.212	0.213	0.212	0.212	0.215	0.213	0.212	0.207	0.215	0.212	0.215	0.212	0.215	0.215	0.212	0.21	0.212	0.218	0.218	0.209	0.212	0.21	0.213	0.209	0.212	0.212	0.21	0.21	0.212	0.212	0.212	0.21	0.213	0.213	0.213	0.218	0.212	0.213	0.212	0.212	0.215	0.213	0.21	0.215	0.209	0.212	0.212	0.213
SO239_133_3_Amphiophiura_bullata_Species_16	0.205	0.209	0.21	0.209	0.209	0.212	0.21	0.209	0.204	0.212	0.209	0.212	0.209	0.212	0.212	0.209	0.207	0.209	0.216	0.216	0.212	0.215	0.213	0.213	0.212	0.215	0.215	0.213	0.213	0.215	0.212	0.215	0.213	0.216	0.216	0.216	0.221	0.215	0.216	0.215	0.215	0.218	0.216	0.213	0.218	0.212	0.215	0.215	0.216
SO239_133_5_Amphiophiura_bullata_Species_16	0.212	0.215	0.216	0.215	0.215	0.218	0.213	0.215	0.21	0.218	0.215	0.215	0.215	0.218	0.218	0.215	0.213	0.215	0.221	0.221	0.212	0.212	0.21	0.213	0.209	0.212	0.212	0.213	0.21	0.212	0.212	0.212	0.21	0.213	0.213	0.213	0.218	0.212	0.213	0.212	0.212	0.215	0.213	0.21	0.215	0.209	0.212	0.212	0.213
SO239_133_9_Amphiophiura_bullata_Species_16	0.21	0.213	0.215	0.213	0.213	0.216	0.215	0.213	0.209	0.216	0.213	0.216	0.213	0.216	0.216	0.213	0.212	0.213	0.22	0.22	0.212	0.215	0.213	0.216	0.212	0.215	0.215	0.213	0.213	0.215	0.215	0.215	0.213	0.216	0.216	0.216	0.221	0.215	0.216	0.215	0.215	0.218	0.216	0.213	0.218	0.212	0.215	0.215	0.216
2018_new_Amphiophiura_bullata_Species_16	0.207	0.21	0.212	0.21	0.21	0.213	0.212	0.21	0.205	0.213	0.21	0.213	0.21	0.213	0.213	0.21	0.209	0.21	0.216	0.216	0.212	0.215	0.213	0.216	0.212	0.215	0.215	0.213	0.213	0.215	0.215	0.215	0.213	0.216	0.216	0.216	0.218	0.215	0.216	0.215	0.215	0.218	0.216	0.213	0.218	0.212	0.215	0.215	0.216
SO239_197_6_Ophioscolecidae_sp_Species_17	0.212	0.209	0.213	0.212	0.209	0.213	0.213	0.207	0.205	0.212	0.209	0.207	0.209	0.209	0.205	0.209	0.215	0.204	0.213	0.213	0.219	0.224	0.221	0.221	0.228	0.221	0.221	0.219	0.218	0.222	0.219	0.222	0.222	0.222	0.224	0.224	0.221	0.222	0.224	0.224	0.227	0.225	0.222	0.224	0.224	0.219	0.222	0.225	0.224
SO239_197_5_Ophioscolecidae_sp_Species_17	0.212	0.209	0.213	0.212	0.209	0.213	0.213	0.207	0.205	0.212	0.209	0.207	0.209	0.209	0.205	0.209	0.215	0.204	0.213	0.213	0.219	0.224	0.221	0.221	0.228	0.221	0.221	0.219	0.218	0.222	0.219	0.222	0.222	0.222	0.224	0.224	0.221	0.222	0.224	0.224	0.227	0.225	0.222	0.224	0.224	0.219	0.222	0.225	0.224
SO239_197_4_Ophioscolecidae_sp_Species_17	0.212	0.209	0.213	0.212	0.209	0.213	0.213	0.207	0.205	0.212	0.209	0.207	0.209	0.209	0.205	0.209	0.215	0.204	0.213	0.213	0.219	0.224	0.221	0.221	0.228	0.221	0.221	0.219	0.218	0.222	0.219	0.222	0.222	0.222	0.224	0.224	0.221	0.222	0.224	0.224	0.227	0.225	0.222	0.224	0.224	0.219	0.222	0.225	0.224
SO239_24_21_Ophioscolecidae_sp_Species_18	0.222	0.212	0.215	0.216	0.213	0.219	0.215	0.222	0.209	0.212	0.212	0.212	0.216	0.213	0.213	0.215	0.219	0.215	0.213	0.213	0.247	0.245	0.242	0.242	0.247	0.244	0.244	0.242	0.24	0.244	0.24	0.244	0.244	0.242	0.245	0.245	0.239	0.244	0.242	0.247	0.247	0.247	0.244	0.245	0.244	0.242	0.244	0.245	0.245
SO242_1_347_Ophioscolecidae_sp_Species_18	0.224	0.213	0.216	0.218	0.215	0.221	0.216	0.224	0.21	0.213	0.213	0.213	0.218	0.215	0.215	0.216	0.221	0.216	0.215	0.215	0.244	0.242	0.239	0.239	0.244	0.24	0.24	0.239	0.237	0.24	0.237	0.24	0.24	0.239	0.242	0.242	0.236	0.24	0.239	0.244	0.244	0.244	0.24	0.242	0.24	0.239	0.24	0.242	0.242
MA13_18_7_Ophioscolecidae_sp_Species_18	0.218	0.207	0.21	0.212	0.21	0.216	0.21	0.218	0.204	0.209	0.207	0.207	0.212	0.209	0.209	0.21	0.215	0.21	0.208	0.208	0.25	0.248	0.245	0.245	0.25	0.247	0.247	0.245	0.244	0.247	0.244	0.247	0.247	0.245	0.248	0.248	0.242	0.247	0.245	0.248	0.25	0.25	0.247	0.248	0.247	0.245	0.247	0.248	0.248
AB2_EB2_12_10_Ophioscolecidae_sp_Species_19	0.239	0.239	0.245	0.239	0.239	0.242	0.236	0.239	0.24	0.234	0.237	0.239	0.24	0.234	0.24	0.242	0.24	0.237	0.239	0.239	0.242	0.239	0.238	0.24	0.244	0.239	0.242	0.242	0.239	0.24	0.239	0.24	0.24	0.242	0.242	0.239	0.242	0.239	0.24	0.242	0.244	0.242	0.242	0.239	0.244	0.239	0.24	0.239	0.242
SO239_192_2_Ophioscolecidae_sp_Species_20	0.222	0.219	0.213	0.218	0.221	0.222	0.225	0.222	0.218	0.218	0.221	0.224	0.218	0.218	0.218	0.218	0.218	0.218	0.213	0.213	0.237	0.239	0.239	0.239	0.239	0.237	0.237	0.234	0.239	0.237	0.24	0.237	0.236	0.237	0.236	0.239	0.239	0.237	0.234	0.239	0.242	0.237	0.237	0.239	0.24	0.234	0.237	0.24	0.239
SO239_192_7_Ophioscolecidae_sp_Species_20	0.222	0.222	0.216	0.221	0.224	0.225	0.225	0.225	0.221	0.221	0.224	0.227	0.221	0.221	0.221	0.221	0.218	0.221	0.216	0.216	0.236	0.237	0.238	0.237	0.237	0.236	0.236	0.233	0.237	0.236	0.239	0.236	0.234	0.236	0.234	0.237	0.237	0.236	0.233	0.238	0.24	0.236	0.236	0.237	0.239	0.233	0.236	0.239	0.237
SO239_158_3_Ophioscolecidae_Species_20	0.222	0.222	0.216	0.221	0.224	0.225	0.225	0.225	0.221	0.221	0.224	0.227	0.221	0.221	0.221	0.221	0.218	0.221	0.216	0.216	0.236	0.237	0.238	0.237	0.237	0.236	0.236	0.233	0.237	0.236	0.239	0.236	0.234	0.236	0.234	0.237	0.237	0.236	0.233	0.238	0.24	0.236	0.236	0.237	0.239	0.233	0.236	0.239	0.237
SO239_192_8_Ophioscolecidae_sp_Species_20	0.222	0.222	0.216	0.221	0.224	0.225	0.225	0.225	0.221	0.221	0.224	0.227	0.221	0.221	0.221	0.221	0.218	0.221	0.216	0.216	0.236	0.237	0.238	0.237	0.237	0.236	0.236	0.233	0.237	0.236	0.239	0.236	0.234	0.236	0.234	0.237	0.237	0.236	0.233	0.238	0.24	0.236	0.236	0.237	0.239	0.233	0.236	0.239	0.237
SO242_1_116_A6_Ophiotoma_sp_Species_21	0.224	0.23	0.222	0.231	0.225	0.228	0.225	0.227	0.227	0.224	0.231	0.227	0.224	0.231	0.222	0.224	0.224	0.227	0.226	0.226	0.221	0.219	0.221	0.218	0.222	0.219	0.218	0.219	0.216	0.219	0.219	0.219	0.219	0.218	0.218	0.221	0.216	0.219	0.218	0.223	0.222	0.219	0.219	0.219	0.219	0.216	0.219	0.221	0.221
53_159_3_Ophiotoma_sp_Species_21	0.224	0.23	0.222	0.231	0.225	0.228	0.225	0.227	0.227	0.224	0.231	0.227	0.224	0.231	0.222	0.224	0.224	0.227	0.226	0.226	0.218	0.216	0.218	0.215	0.219	0.216	0.215	0.219	0.218	0.216	0.216	0.216	0.216	0.218	0.215	0.218	0.216	0.216	0.215	0.22	0.219	0.216	0.218	0.216	0.216	0.213	0.216	0.218	0.218
SO239_20_12_Ophiotoma_sp_Species_21	0.224	0.23	0.222	0.231	0.225	0.228	0.225	0.227	0.227	0.224	0.231	0.227	0.224	0.231	0.222	0.224	0.224	0.227	0.226	0.226	0.221	0.219	0.221	0.218	0.222	0.219	0.218	0.219	0.216	0.219	0.219	0.219	0.219	0.218	0.218	0.221	0.216	0.219	0.218	0.223	0.222	0.219	0.219	0.219	0.219	0.216	0.219	0.221	0.221
AB1_EB5_10_10_Ophioleucidae_sp_Species_22	0.239	0.237	0.239	0.239	0.237	0.239	0.234	0.237	0.234	0.233	0.239	0.236	0.234	0.236	0.237	0.234	0.233	0.236	0.236	0.236	0.237	0.237	0.239	0.233	0.237	0.237	0.239	0.236	0.234	0.237	0.234	0.237	0.237	0.236	0.239	0.239	0.24	0.237	0.24	0.241	0.242	0.237	0.237	0.237	0.237	0.234	0.237	0.24	0.239
NODBIO_33_22_Ophioleucidae_sp_Species_22	0.24	0.239	0.24	0.24	0.239	0.24	0.236	0.239	0.236	0.234	0.24	0.237	0.236	0.237	0.239	0.236	0.234	0.237	0.237	0.237	0.237	0.237	0.239	0.233	0.237	0.237	0.239	0.236	0.234	0.237	0.234	0.237	0.237	0.236	0.239	0.239	0.24	0.237	0.24	0.241	0.242	0.237	0.237	0.237	0.237	0.234	0.237	0.24	0.239
SO239_59_1_Ophioleucidae_sp_Species_22	0.239	0.237	0.239	0.239	0.237	0.239	0.234	0.237	0.234	0.233	0.239	0.236	0.234	0.236	0.237	0.234	0.233	0.236	0.236	0.236	0.237	0.237	0.239	0.233	0.237	0.237	0.239	0.236	0.234	0.237	0.234	0.237	0.237	0.236	0.239	0.239	0.24	0.237	0.24	0.241	0.242	0.237	0.237	0.237	0.237	0.234	0.237	0.24	0.239
SO239_24_17_Ophioleucidae_sp_Species_22	0.239	0.238	0.239	0.239	0.238	0.239	0.235	0.238	0.235	0.233	0.239	0.236	0.235	0.236	0.238	0.235	0.235	0.236	0.236	0.236	0.238	0.238	0.239	0.233	0.236	0.238	0.239	0.236	0.235	0.238	0.235	0.238	0.238	0.236	0.239	0.239	0.241	0.238	0.241	0.241	0.241	0.238	0.238	0.238	0.238	0.235	0.238	0.239	0.239
SO239_397_Ophioleuce_regulare_Species_23	0.224	0.218	0.224	0.221	0.218	0.223	0.223	0.218	0.22	0.223	0.224	0.223	0.22	0.224	0.221	0.22	0.22	0.22	0.21	0.21	0.242	0.245	0.243	0.244	0.244	0.242	0.244	0.241	0.241	0.244	0.244	0.244	0.244	0.244	0.242	0.245	0.252	0.244	0.247	0.246	0.247	0.244	0.244	0.244	0.241	0.241	0.244	0.244	0.245
AB2_EB1_13_8_Ophiocymbium_sp_Species_24	0.192	0.187	0.187	0.192	0.186	0.189	0.19	0.184	0.187	0.186	0.187	0.187	0.189	0.19	0.187	0.187	0.19	0.189	0.189	0.189	0.26	0.263	0.264	0.26	0.263	0.262	0.26	0.257	0.263	0.262	0.262	0.262	0.262	0.26	0.262	0.263	0.256	0.262	0.259	0.262	0.263	0.265	0.262	0.262	0.262	0.26	0.262	0.262	0.263
AB2_EB1_13_30_Ophiocymbium_sp_Species_24	0.191	0.186	0.186	0.191	0.184	0.188	0.189	0.183	0.186	0.184	0.186	0.186	0.188	0.189	0.186	0.186	0.189	0.188	0.188	0.188	0.259	0.262	0.263	0.259	0.262	0.261	0.259	0.256	0.262	0.261	0.261	0.261	0.261	0.259	0.261	0.262	0.255	0.261	0.258	0.261	0.262	0.264	0.261	0.261	0.261	0.259	0.261	0.261	0.262
AB2_EB1_13_40_Ophiocymbium_sp_Species_24	0.192	0.187	0.187	0.192	0.186	0.189	0.19	0.184	0.187	0.186	0.187	0.187	0.189	0.19	0.187	0.187	0.19	0.189	0.189	0.189	0.26	0.263	0.264	0.26	0.263	0.262	0.26	0.257	0.263	0.262	0.262	0.262	0.262	0.26	0.262	0.263	0.256	0.262	0.259	0.262	0.263	0.265	0.262	0.262	0.262	0.26	0.262	0.262	0.263
AB2_EB2_12_9_Ophiocymbium_sp_Species_24	0.192	0.187	0.187	0.192	0.186	0.189	0.19	0.184	0.187	0.186	0.187	0.187	0.189	0.19	0.187	0.187	0.19	0.189	0.189	0.189	0.26	0.263	0.264	0.26	0.263	0.262	0.26	0.257	0.263	0.262	0.262	0.262	0.262	0.26	0.262	0.263	0.256	0.262	0.259	0.262	0.263	0.265	0.262	0.262	0.262	0.26	0.262	0.262	0.263
AB2_EB2_12_12_Ophiocymbium_sp_Species_24	0.192	0.187	0.187	0.192	0.186	0.189	0.19	0.184	0.187	0.186	0.187	0.187	0.189	0.19	0.187	0.187	0.19	0.189	0.189	0.189	0.26	0.263	0.264	0.26	0.263	0.262	0.26	0.257	0.263	0.262	0.262	0.262	0.262	0.26	0.262	0.263	0.256	0.262	0.259	0.262	0.263	0.265	0.262	0.262	0.262	0.26	0.262	0.262	0.263
SO239_192_4_Ophiocymbium_sp_Species_24	0.193	0.187	0.189	0.189	0.186	0.186	0.19	0.184	0.184	0.183	0.184	0.187	0.187	0.187	0.184	0.189	0.189	0.189	0.186	0.186	0.263	0.266	0.267	0.263	0.266	0.265	0.263	0.26	0.266	0.265	0.265	0.265	0.265	0.263	0.265	0.266	0.259	0.265	0.262	0.265	0.266	0.268	0.265	0.265	0.265	0.263	0.265	0.265	0.266
SO239_210_1_Ophiocymbium_sp_Species_24	0.193	0.189	0.189	0.19	0.187	0.187	0.192	0.183	0.186	0.184	0.186	0.189	0.187	0.189	0.186	0.189	0.189	0.19	0.188	0.188	0.263	0.266	0.267	0.263	0.266	0.265	0.263	0.26	0.266	0.265	0.265	0.265	0.265	0.263	0.265	0.266	0.259	0.265	0.262	0.265	0.266	0.268	0.265	0.265	0.265	0.263	0.265	0.265	0.266
AB1_EB4_11_30_Ophiocymbium_sp_Species_25	0.239	0.239	0.238	0.241	0.236	0.239	0.241	0.238	0.236	0.239	0.241	0.242	0.236	0.242	0.241	0.235	0.235	0.241	0.239	0.239	0.258	0.261	0.259	0.258	0.258	0.261	0.259	0.255	0.261	0.259	0.259	0.259	0.261	0.258	0.261	0.261	0.265	0.258	0.259	0.264	0.258	0.261	0.259	0.258	0.256	0.256	0.259	0.262	0.261
KU519564.1_NHM_072_Ophiocymbium_Species_25	0.234	0.236	0.236	0.234	0.236	0.236	0.239	0.232	0.232	0.234	0.237	0.239	0.234	0.239	0.237	0.232	0.232	0.239	0.237	0.237	0.262	0.265	0.264	0.264	0.262	0.265	0.264	0.258	0.265	0.264	0.265	0.264	0.262	0.262	0.264	0.262	0.269	0.262	0.265	0.269	0.262	0.264	0.264	0.262	0.26	0.26	0.264	0.265	0.264
AB1_EB3_9_1_Ophiomyces_sp_Species_26	0.199	0.198	0.198	0.195	0.193	0.196	0.192	0.192	0.198	0.199	0.196	0.19	0.198	0.196	0.199	0.196	0.198	0.195	0.199	0.199	0.254	0.254	0.252	0.248	0.251	0.253	0.253	0.254	0.254	0.253	0.25	0.253	0.251	0.253	0.254	0.251	0.253	0.253	0.253	0.256	0.257	0.256	0.253	0.253	0.25	0.254	0.253	0.253	0.254
AB1_EB5_10_1_Ophiomyces_sp_Species_26	0.201	0.199	0.201	0.196	0.198	0.198	0.193	0.193	0.199	0.201	0.198	0.192	0.199	0.198	0.201	0.198	0.199	0.199	0.199	0.199	0.254	0.254	0.252	0.248	0.251	0.253	0.253	0.254	0.254	0.253	0.25	0.253	0.251	0.253	0.254	0.251	0.253	0.253	0.253	0.256	0.257	0.256	0.253	0.253	0.25	0.254	0.253	0.253	0.254
AB1_EB5_10_3_Ophiomyces_sp_Species_26	0.202	0.201	0.201	0.198	0.196	0.199	0.195	0.195	0.201	0.202	0.199	0.193	0.201	0.199	0.202	0.199	0.201	0.198	0.202	0.202	0.254	0.254	0.252	0.248	0.251	0.253	0.253	0.254	0.254	0.253	0.25	0.253	0.251	0.253	0.254	0.251	0.253	0.253	0.253	0.256	0.257	0.256	0.253	0.253	0.25	0.254	0.253	0.253	0.254
AB1_EB4_11_22_Ophiomyces_sp_Species_26	0.201	0.199	0.199	0.196	0.195	0.198	0.193	0.193	0.199	0.201	0.198	0.192	0.199	0.198	0.201	0.198	0.199	0.196	0.2	0.2	0.256	0.256	0.253	0.25	0.253	0.254	0.254	0.256	0.256	0.254	0.251	0.254	0.253	0.254	0.256	0.253	0.254	0.254	0.254	0.258	0.259	0.257	0.254	0.254	0.251	0.256	0.254	0.254	0.256
AB1_EB4_11_24_Ophiomyces_sp_Species_26	0.201	0.196	0.196	0.196	0.195	0.198	0.193	0.193	0.196	0.201	0.198	0.192	0.196	0.198	0.198	0.195	0.199	0.196	0.2	0.2	0.254	0.254	0.252	0.248	0.251	0.253	0.253	0.254	0.254	0.253	0.25	0.253	0.251	0.253	0.254	0.251	0.253	0.253	0.253	0.256	0.257	0.256	0.253	0.253	0.25	0.254	0.253	0.253	0.254
AB1_EB4_11_25_Ophiomyces_sp_Species_26	0.204	0.202	0.202	0.199	0.198	0.201	0.196	0.196	0.202	0.204	0.201	0.195	0.202	0.201	0.204	0.201	0.202	0.199	0.204	0.204	0.253	0.253	0.25	0.247	0.25	0.251	0.251	0.253	0.256	0.251	0.248	0.251	0.25	0.251	0.253	0.25	0.251	0.251	0.251	0.255	0.256	0.254	0.251	0.251	0.248	0.253	0.251	0.251	0.253
AB1_EB4_11_26_Ophiomyces_sp_Species_26	0.204	0.202	0.202	0.199	0.198	0.201	0.196	0.196	0.202	0.204	0.201	0.195	0.202	0.201	0.204	0.201	0.202	0.199	0.202	0.202	0.256	0.256	0.253	0.25	0.253	0.254	0.254	0.256	0.256	0.254	0.251	0.254	0.253	0.254	0.256	0.253	0.254	0.254	0.256	0.258	0.259	0.257	0.254	0.254	0.251	0.256	0.254	0.254	0.256
KU519563.1_NHM_041_Ophiomyces_sp_Species_26	0.202	0.2	0.2	0.197	0.196	0.199	0.194	0.194	0.2	0.202	0.199	0.193	0.2	0.199	0.202	0.199	0.2	0.197	0.201	0.201	0.257	0.257	0.254	0.251	0.254	0.255	0.255	0.257	0.257	0.255	0.252	0.255	0.254	0.255	0.257	0.254	0.254	0.255	0.255	0.258	0.258	0.258	0.255	0.255	0.252	0.257	0.255	0.254	0.257
AB2_EB1_13_5_Ophiocantha_cosmica_Species_27	0.302	0.299	0.305	0.294	0.3	0.3	0.299	0.296	0.297	0.296	0.299	0.297	0.302	0.297	0.302	0.302	0.303	0.3	0.287	0.287	0.335	0.337	0.337	0.34	0.334	0.337	0.337	0.335	0.337	0.337	0.34	0.337	0.337	0.337	0.338	0.338	0.332	0.338	0.334	0.337	0.341	0.34	0.337	0.337	0.337	0.337	0.337	0.337	0.337
MA13_85_30_Ophiocantha_cosmica_Species_27	0.3	0.297	0.303	0.292	0.298	0.298	0.297	0.294	0.295	0.294	0.297	0.295	0.3	0.295	0.3	0.3	0.301	0.298	0.285	0.285	0.338	0.339	0.34	0.341	0.336	0.339	0.339	0.338	0.339	0.339	0.342	0.339	0.339	0.339	0.341	0.341	0.335	0.341	0.336	0.34	0.344	0.342	0.339	0.339	0.339	0.339	0.339	0.339	0.339
MA14_20_4_Ophiocantha_cosmica_Species_27	0.301	0.298	0.304	0.294	0.3	0.3	0.298	0.295	0.297	0.295	0.298	0.297	0.301	0.297	0.301	0.301	0.303	0.3	0.287	0.287	0.339	0.341	0.341	0.342	0.338	0.341	0.341	0.339	0.341	0.341	0.344	0.341	0.341	0.341	0.342	0.342	0.336	0.342	0.338	0.341	0.346	0.344	0.341	0.341	0.341	0.341	0.341	0.341	0.341
SO239_403_Ophiocantha_cosmica_Species_27	0.302	0.299	0.305	0.294	0.3	0.3	0.299	0.296	0.297	0.296	0.299	0.297	0.302	0.297	0.302	0.302	0.303	0.3	0.288	0.288	0.34	0.341	0.342	0.34	0.338	0.341	0.341	0.34	0.341	0.341	0.345	0.341	0.341	0.341	0.343	0.343	0.337	0.343	0.338	0.342	0.346	0.345	0.341	0.341	0.338	0.341	0.341	0.341	0.341
SO239_130_Ophiocantha_cosmica_Species_27	0.301	0.298	0.304	0.294	0.3	0.3	0.298	0.295	0.297	0.295	0.298	0.297	0.301	0.297	0.301	0.301	0.303	0.3	0.288	0.288	0.336	0.338	0.338	0.339	0.335	0.338	0.338	0.336	0.338	0.338	0.341	0.338	0.338	0.338	0.339	0.339	0.335	0.339	0.335	0.338	0.343	0.341	0.338	0.338	0.338	0.338	0.338	0.338	0.338
SO239_407_Ophiocantha_cosmica_Species_27	0.3	0.297	0.303	0.292	0.298	0.298	0.297	0.294	0.295	0.294	0.297	0.295	0.3	0.295	0.3	0.3	0.301	0.298	0.285	0.285	0.338	0.339	0.34	0.341	0.336	0.339	0.339	0.338	0.339	0.339	0.342	0.339	0.339	0.339	0.341	0.341	0.335	0.341	0.336	0.34	0.344	0.342	0.339	0.339	0.339	0.339	0.339	0.339	0.339
SO239_408_Ophiocantha_cosmica_Species_27	0.3	0.297	0.303	0.292	0.298	0.298	0.297	0.294	0.295	0.294	0.297	0.295	0.3	0.295	0.3	0.3	0.301	0.298	0.285	0.285	0.338	0.339	0.34	0.341	0.336	0.339	0.339	0.338	0.339	0.339	0.342	0.339	0.339	0.339	0.341	0.341	0.335	0.341	0.336	0.34	0.344	0.342	0.339	0.339	0.339	0.339	0.339	0.339	0.339
SO239_409_Ophiocantha_cosmica_Species_27	0.3	0.297	0.303	0.292	0.298	0.298	0.297	0.294	0.295	0.294	0.297	0.295	0.3	0.295	0.3	0.3	0.301	0.298	0.285	0.285	0.338	0.339	0.34	0.341	0.336	0.339	0.339	0.338	0.339	0.339	0.342	0.339	0.339	0.339	0.341	0.341	0.335	0.341	0.336	0.34	0.344	0.342	0.339	0.339	0.339	0.339	0.339	0.339	0.339
SO239_411-2_Ophiocantha_cosmica_Species_27	0.301	0.298	0.304	0.294	0.3	0.3	0.298	0.295	0.297	0.295	0.298	0.297	0.301	0.297	0.301	0.301	0.303	0.3	0.287	0.287	0.336	0.338	0.338	0.339	0.335	0.338	0.338	0.336	0.338	0.338	0.341	0.338	0.338	0.338	0.339	0.339	0.333	0.339	0.335	0.338	0.342	0.341	0.338	0.338	0.338	0.338	0.338	0.338	0.338
SO239_412_Ophiocantha_cosmica_Species_27	0.3	0.297	0.303	0.292	0.298	0.298	0.297	0.294	0.295	0.294	0.297	0.295	0.3	0.295	0.3	0.3	0.301	0.298	0.285	0.285	0.338	0.339	0.34	0.341	0.336	0.339	0.339	0.338	0.339	0.339	0.342	0.339	0.339	0.339	0.341	0.341	0.335	0.341	0.336	0.34	0.344	0.342	0.339	0.339	0.339	0.339	0.339	0.339	0.339
SO239_413_Ophiocantha_cosmica_Species_27	0.3	0.297	0.303	0.292	0.298	0.298	0.297	0.294	0.295	0.294	0.297	0.295	0.3	0.295	0.3	0.3	0.301	0.298	0.285	0.285	0.338	0.339	0.34	0.341	0.336	0.339	0.339	0.338	0.339	0.339	0.342	0.339	0.339	0.339	0.341	0.341	0.335	0.341	0.336	0.34	0.344	0.342	0.339	0.339	0.339	0.339	0.339	0.339	0.339
SO239_414_Ophiocantha_cosmica_Species_27	0.3	0.297	0.303	0.292	0.298	0.298	0.297	0.294	0.295	0.294	0.297	0.295	0.3	0.295	0.3	0.3	0.301	0.298	0.285	0.285	0.338	0.339	0.34	0.341	0.336	0.339	0.339	0.338	0.339	0.339	0.342	0.339	0.339	0.339	0.341	0.341	0.335	0.341	0.336	0.34	0.344	0.342	0.339	0.339	0.339	0.339	0.339	0.339	0.339
SO239_415_Ophiocantha_cosmica_Species_27	0.301	0.298	0.304	0.294	0.3	0.3	0.298	0.295	0.297	0.295	0.298	0.297	0.301	0.297	0.301	0.301	0.303	0.3	0.287	0.287	0.336	0.338	0.338	0.339	0.335	0.338	0.338	0.336	0.338	0.338	0.341	0.338	0.338	0.338	0.339	0.339	0.333	0.339	0.335	0.338	0.342	0.341	0.338	0.338	0.338	0.338	0.338	0.338	0.338
SO239_416_Ophiocantha_cosmica_Species_27	0.3	0.297	0.303	0.292	0.298	0.298	0.297	0.294	0.295	0.294	0.297	0.295	0.3	0.295	0.3	0.3	0.301	0.298	0.285	0.285	0.338	0.339	0.34	0.341	0.336	0.339	0.339	0.338	0.339	0.339	0.342	0.339	0.339	0.339	0.341	0.341	0.335	0.341	0.336	0.34	0.344	0.342	0.339	0.339	0.339	0.339	0.339	0.339	0.339
SO239_417_Ophiocantha_cosmica_Species_27	0.298	0.295	0.301	0.291	0.297	0.297	0.295	0.292	0.294	0.292	0.295	0.294	0.298	0.294	0.298	0.298	0.3	0.297	0.285	0.285	0.338	0.339	0.34	0.341	0.336	0.339	0.339	0.338	0.339	0.339	0.342	0.339	0.339	0.339	0.341	0.341	0.335	0.341	0.336	0.34	0.344	0.342	0.339	0.339	0.339	0.339	0.339	0.339	0.339
SO239_418_Ophiocantha_cosmica_Species_27	0.3	0.297	0.303	0.292	0.298	0.298	0.297	0.294	0.295	0.294	0.297	0.295	0.3	0.295	0.3	0.3	0.301	0.298	0.285	0.285	0.338	0.339	0.34	0.341	0.336	0.339	0.339	0.338	0.339	0.339	0.342	0.339	0.339	0.339	0.341	0.341	0.335	0.341	0.336	0.34	0.344	0.342	0.339	0.339	0.339	0.339	0.339	0.339	0.339
SO239_419_Ophiocantha_cosmica_Species_27	0.3	0.297	0.303	0.292	0.298	0.298	0.297	0.294	0.295	0.294	0.297	0.295	0.3	0.295	0.3	0.3	0.301	0.298	0.285	0.285	0.338	0.339	0.34	0.341	0.336	0.339	0.339	0.338	0.339	0.339	0.342	0.339	0.339	0.339	0.341	0.341	0.335	0.341	0.336	0.34	0.344	0.342	0.339	0.339	0.339	0.339	0.339	0.339	0.339
SO242_2_176_F7_Ophiocantha_cosmica_Species_27	0.3	0.297	0.303	0.292	0.298	0.298	0.297	0.294	0.295	0.294	0.297	0.295	0.3	0.295	0.3	0.3	0.301	0.298	0.285	0.285	0.338	0.339	0.34	0.341	0.336	0.339	0.339	0.338	0.339	0.339	0.342	0.339	0.339	0.339	0.341	0.341	0.335	0.341	0.336	0.34	0.344	0.342	0.339	0.339	0.339	0.339	0.339	0.339	0.339
SO242_2_191_F5_Ophiocantha_cosmica_Species_27	0.3	0.297	0.303	0.292	0.298	0.298	0.297	0.294	0.295	0.294	0.297	0.295	0.3	0.295	0.3	0.3	0.301	0.298	0.285	0.285	0.338	0.339	0.34	0.341	0.336	0.339	0.339	0.338	0.339	0.339	0.342	0.339	0.339	0.339	0.341	0.341	0.335	0.341	0.336	0.34	0.344	0.342	0.339	0.339	0.339	0.339	0.339	0.339	0.339
AB2_EB2_12_13_Ophiotholia_sp_Species_28	0.239	0.234	0.233	0.234	0.236	0.237	0.239	0.237	0.231	0.234	0.231	0.231	0.236	0.239	0.236	0.236	0.239	0.236	0.229	0.229	0.295	0.297	0.296	0.298	0.295	0.298	0.297	0.295	0.295	0.297	0.294	0.297	0.297	0.297	0.298	0.297	0.294	0.297	0.298	0.3	0.301	0.3	0.297	0.298	0.297	0.295	0.297	0.295	0.298
SO239_197_3_Ophitholia_sp_Species_28	0.237	0.23	0.228	0.23	0.231	0.233	0.233	0.23	0.227	0.23	0.227	0.227	0.231	0.234	0.231	0.231	0.234	0.231	0.226	0.226	0.301	0.301	0.3	0.303	0.3	0.303	0.301	0.3	0.297	0.301	0.298	0.301	0.301	0.301	0.303	0.301	0.298	0.301	0.303	0.305	0.306	0.304	0.301	0.303	0.304	0.3	0.301	0.301	0.303
MA14_66_10_Ophiotholia_sp2_Species_28	0.256	0.252	0.252	0.25	0.254	0.254	0.252	0.247	0.25	0.252	0.247	0.247	0.252	0.252	0.25	0.252	0.256	0.254	0.247	0.247	0.309	0.309	0.308	0.309	0.308	0.309	0.309	0.309	0.308	0.309	0.306	0.309	0.309	0.309	0.311	0.311	0.306	0.309	0.309	0.309	0.311	0.313	0.309	0.309	0.309	0.308	0.309	0.306	0.311
KU519559.1_NHM_076_Ophiotholia_sp_Species_28	0.244	0.24	0.238	0.24	0.241	0.243	0.244	0.243	0.237	0.24	0.237	0.237	0.241	0.243	0.241	0.241	0.244	0.241	0.235	0.235	0.293	0.295	0.293	0.296	0.293	0.296	0.295	0.293	0.293	0.295	0.292	0.295	0.295	0.295	0.296	0.295	0.293	0.295	0.296	0.298	0.298	0.298	0.295	0.296	0.295	0.293	0.295	0.292	0.296
KU519560.1_NHM_078_Ophiotholia_Species_28	0.244	0.24	0.238	0.24	0.241	0.243	0.244	0.243	0.237	0.24	0.237	0.237	0.241	0.243	0.241	0.241	0.244	0.241	0.235	0.235	0.293	0.295	0.293	0.296	0.293	0.296	0.295	0.293	0.293	0.295	0.292	0.295	0.295	0.295	0.296	0.295	0.293	0.295	0.296	0.298	0.298	0.298	0.295	0.296	0.295	0.293	0.295	0.292	0.296
KU519561.1_NHM_104_Ophiotholia_Species_28	0.244	0.24	0.238	0.24	0.241	0.243	0.244	0.243	0.237	0.24	0.237	0.237	0.241	0.243	0.241	0.241	0.244	0.241	0.235	0.235	0.292	0.293	0.292	0.295	0.292	0.295	0.293	0.292	0.292	0.293	0.29	0.293	0.293	0.293	0.295	0.293	0.292	0.293	0.295	0.296	0.296	0.296	0.293	0.295	0.293	0.292	0.293	0.29	0.295
KU519562.1_NHM_119_Ophiotholia_Species_28	0.244	0.24	0.238	0.24	0.241	0.243	0.244	0.243	0.237	0.24	0.237	0.237	0.241	0.243	0.241	0.241	0.244	0.241	0.235	0.235	0.292	0.293	0.292	0.295	0.292	0.295	0.293	0.292	0.292	0.293	0.29	0.293	0.293	0.293	0.295	0.293	0.292	0.293	0.295	0.296	0.296	0.296	0.293	0.295	0.293	0.292	0.293	0.29	0.295
AB1_EB4_11_23_Ophioleucidae_sp_Species_29	0.219	0.216	0.216	0.213	0.218	0.219	0.219	0.218	0.218	0.218	0.218	0.219	0.216	0.218	0.216	0.216	0.219	0.219	0.218	0.218	0.265	0.265	0.267	0.263	0.26	0.265	0.265	0.262	0.262	0.265	0.262	0.265	0.263	0.265	0.266	0.266	0.257	0.265	0.262	0.268	0.269	0.268	0.265	0.263	0.268	0.265	0.265	0.265	0.266
AB1_EB4_11_29_Ophioleucidae_sp_Species_29	0.221	0.218	0.218	0.215	0.219	0.221	0.221	0.219	0.219	0.219	0.219	0.221	0.218	0.219	0.218	0.218	0.221	0.221	0.22	0.22	0.266	0.266	0.268	0.265	0.262	0.266	0.266	0.263	0.263	0.266	0.263	0.266	0.265	0.266	0.268	0.268	0.259	0.266	0.263	0.27	0.271	0.269	0.266	0.265	0.269	0.266	0.266	0.266	0.268
AB2_EB2_12_7_Ophioleucidae_sp_Species_29	0.219	0.216	0.216	0.213	0.218	0.219	0.219	0.218	0.218	0.218	0.218	0.219	0.216	0.218	0.216	0.216	0.219	0.219	0.218	0.218	0.265	0.265	0.267	0.263	0.26	0.265	0.265	0.262	0.262	0.265	0.262	0.265	0.263	0.265	0.266	0.266	0.257	0.265	0.262	0.268	0.269	0.268	0.265	0.263	0.268	0.265	0.265	0.265	0.266
AB2_EB1_13_17_Ophioleucidae_sp_Species_29	0.218	0.218	0.218	0.215	0.219	0.221	0.218	0.219	0.219	0.219	0.219	0.221	0.218	0.219	0.218	0.218	0.218	0.221	0.22	0.22	0.265	0.265	0.267	0.263	0.26	0.265	0.265	0.262	0.262	0.265	0.262	0.265	0.263	0.265	0.266	0.266	0.257	0.265	0.262	0.268	0.269	0.268	0.265	0.263	0.268	0.265	0.265	0.265	0.266
AB2_EB1_13_38_Ophioleucidae_sp_Species_29	0.219	0.216	0.216	0.213	0.218	0.219	0.219	0.218	0.218	0.218	0.218	0.219	0.216	0.218	0.216	0.216	0.219	0.219	0.218	0.218	0.265	0.265	0.267	0.263	0.26	0.265	0.265	0.262	0.262	0.265	0.262	0.265	0.263	0.265	0.266	0.266	0.257	0.265	0.262	0.268	0.269	0.268	0.265	0.263	0.268	0.265	0.265	0.265	0.266
MA14_38_5_Ophioleucidae_sp_Species_29	0.218	0.215	0.215	0.212	0.216	0.218	0.218	0.216	0.216	0.216	0.216	0.218	0.215	0.216	0.215	0.215	0.218	0.218	0.216	0.216	0.265	0.265	0.267	0.263	0.26	0.265	0.265	0.262	0.262	0.265	0.262	0.265	0.263	0.265	0.266	0.266	0.257	0.265	0.262	0.268	0.269	0.268	0.265	0.263	0.268	0.265	0.265	0.265	0.266
MA14_66_5_Ophioleucidae_sp_Species_29	0.219	0.216	0.216	0.213	0.218	0.219	0.219	0.218	0.218	0.218	0.218	0.219	0.216	0.218	0.216	0.216	0.219	0.219	0.218	0.218	0.265	0.265	0.267	0.263	0.26	0.265	0.265	0.262	0.262	0.265	0.262	0.265	0.263	0.265	0.266	0.266	0.257	0.265	0.262	0.268	0.269	0.268	0.265	0.263	0.268	0.265	0.265	0.265	0.266
MA14_66_6_Ophioleucidae_sp_Species_29	0.213	0.213	0.213	0.213	0.215	0.216	0.213	0.216	0.216	0.218	0.215	0.216	0.213	0.215	0.213	0.213	0.213	0.216	0.218	0.218	0.266	0.266	0.268	0.262	0.268	0.266	0.266	0.263	0.263	0.266	0.263	0.266	0.265	0.266	0.268	0.268	0.259	0.266	0.263	0.27	0.271	0.269	0.266	0.265	0.266	0.266	0.266	0.266	0.268
MA13_85_37_Ophioleucidae_sp_Species_29	0.218	0.215	0.215	0.212	0.216	0.218	0.218	0.216	0.216	0.216	0.216	0.218	0.215	0.216	0.215	0.215	0.218	0.218	0.216	0.216	0.266	0.266	0.268	0.265	0.262	0.266	0.266	0.263	0.263	0.266	0.263	0.266	0.265	0.266	0.268	0.268	0.259	0.266	0.263	0.27	0.271	0.269	0.266	0.265	0.269	0.266	0.266	0.266	0.268
NODBIO_33_23_Ophioleucidae_sp_Species_29	0.218	0.215	0.215	0.212	0.216	0.218	0.218	0.216	0.216	0.216	0.216	0.218	0.215	0.216	0.215	0.215	0.218	0.218	0.216	0.216	0.265	0.265	0.267	0.263	0.26	0.265	0.265	0.262	0.262	0.265	0.262	0.265	0.263	0.265	0.266	0.266	0.257	0.265	0.262	0.268	0.269	0.268	0.265	0.263	0.268	0.265	0.265	0.265	0.266
NODBIO_101_3_Ophioleucidae_sp_Species_29	0.22	0.216	0.216	0.213	0.218	0.22	0.22	0.218	0.218	0.218	0.218	0.22	0.216	0.218	0.216	0.216	0.22	0.22	0.218	0.218	0.265	0.265	0.267	0.264	0.261	0.265	0.265	0.262	0.262	0.265	0.262	0.265	0.264	0.265	0.267	0.267	0.258	0.265	0.262	0.269	0.27	0.268	0.265	0.264	0.268	0.265	0.265	0.265	0.267
SO239_20_5_Ophioleucidae_sp_Species_29	0.219	0.216	0.216	0.213	0.218	0.219	0.219	0.218	0.218	0.218	0.218	0.219	0.216	0.218	0.216	0.216	0.219	0.219	0.218	0.218	0.265	0.265	0.267	0.263	0.26	0.265	0.265	0.262	0.262	0.265	0.262	0.265	0.263	0.265	0.266	0.266	0.257	0.265	0.262	0.268	0.269	0.268	0.265	0.263	0.268	0.265	0.265	0.265	0.266
SO239_24_3_Ophioleucidae_sp_Species_29	0.219	0.216	0.216	0.213	0.218	0.219	0.219	0.218	0.218	0.218	0.218	0.219	0.216	0.218	0.216	0.216	0.219	0.219	0.218	0.218	0.265	0.265	0.267	0.263	0.26	0.265	0.265	0.262	0.262	0.265	0.262	0.265	0.263	0.265	0.266	0.266	0.257	0.265	0.262	0.268	0.269	0.268	0.265	0.263	0.268	0.265	0.265	0.265	0.266
SO239_24_12_Ophioleucidae_sp_Species_29	0.219	0.216	0.216	0.213	0.218	0.219	0.219	0.218	0.218	0.218	0.218	0.219	0.216	0.218	0.216	0.216	0.219	0.219	0.218	0.218	0.265	0.265	0.267	0.263	0.26	0.265	0.265	0.262	0.262	0.265	0.262	0.265	0.263	0.265	0.266	0.266	0.257	0.265	0.262	0.268	0.269	0.268	0.265	0.263	0.268	0.265	0.265	0.265	0.266
SO239_24_14_Ophioleucidae_sp_Species_29	0.219	0.216	0.216	0.213	0.218	0.219	0.219	0.218	0.218	0.218	0.218	0.219	0.216	0.218	0.216	0.216	0.219	0.219	0.218	0.218	0.265	0.265	0.267	0.263	0.26	0.265	0.265	0.262	0.262	0.265	0.262	0.265	0.263	0.265	0.266	0.266	0.257	0.265	0.262	0.268	0.269	0.268	0.265	0.263	0.268	0.265	0.265	0.265	0.266
SO239_24_26_Ophioleucidae_sp_Species_29	0.219	0.216	0.216	0.213	0.218	0.219	0.219	0.218	0.218	0.218	0.218	0.219	0.216	0.218	0.216	0.216	0.219	0.219	0.218	0.218	0.265	0.265	0.267	0.263	0.26	0.265	0.265	0.262	0.262	0.265	0.262	0.265	0.263	0.265	0.266	0.266	0.257	0.265	0.262	0.268	0.269	0.268	0.265	0.263	0.268	0.265	0.265	0.265	0.266
SO239_81_6_Ophioleucidae_sp_Species_29	0.221	0.218	0.218	0.215	0.22	0.221	0.221	0.22	0.22	0.22	0.22	0.221	0.218	0.22	0.218	0.218	0.221	0.221	0.22	0.22	0.267	0.267	0.269	0.265	0.262	0.267	0.267	0.264	0.264	0.267	0.264	0.267	0.265	0.267	0.267	0.268	0.259	0.267	0.264	0.27	0.271	0.268	0.267	0.265	0.27	0.267	0.267	0.267	0.268
SO239_81_10_Ophioleucidae_sp_Species_29	0.223	0.22	0.22	0.217	0.221	0.223	0.223	0.221	0.221	0.221	0.221	0.223	0.22	0.221	0.22	0.22	0.223	0.223	0.222	0.222	0.266	0.266	0.267	0.264	0.261	0.266	0.266	0.263	0.263	0.266	0.263	0.266	0.264	0.266	0.267	0.267	0.26	0.266	0.263	0.269	0.269	0.269	0.266	0.264	0.269	0.266	0.266	0.264	0.267
SO239_81_19_Ophioleucidae_sp_Species_29	0.219	0.216	0.216	0.213	0.218	0.219	0.219	0.218	0.218	0.218	0.218	0.219	0.216	0.218	0.216	0.216	0.219	0.219	0.218	0.218	0.265	0.265	0.267	0.263	0.26	0.265	0.265	0.262	0.262	0.265	0.262	0.265	0.263	0.265	0.266	0.266	0.257	0.265	0.262	0.268	0.269	0.268	0.265	0.263	0.268	0.265	0.265	0.265	0.266
SO239_81_22_Ophioleucidae_sp_Species_29	0.219	0.216	0.216	0.213	0.218	0.219	0.219	0.218	0.218	0.218	0.218	0.219	0.216	0.218	0.216	0.216	0.219	0.219	0.218	0.218	0.265	0.265	0.267	0.263	0.26	0.265	0.265	0.262	0.262	0.265	0.262	0.265	0.263	0.265	0.266	0.266	0.257	0.265	0.262	0.268	0.269	0.268	0.265	0.263	0.268	0.265	0.265	0.265	0.266
SO239_118_9_Ophioleucidae_sp_Species_29	0.219	0.216	0.216	0.213	0.218	0.219	0.219	0.218	0.218	0.218	0.218	0.219	0.216	0.218	0.216	0.216	0.219	0.219	0.218	0.218	0.265	0.265	0.267	0.263	0.26	0.265	0.265	0.262	0.262	0.265	0.262	0.265	0.263	0.265	0.266	0.266	0.257	0.265	0.262	0.268	0.269	0.268	0.265	0.263	0.268	0.265	0.265	0.265	0.266
SO239_133_1_Ophioleucidae_sp_Species_29	0.215	0.215	0.213	0.215	0.216	0.218	0.215	0.218	0.218	0.219	0.216	0.218	0.215	0.216	0.215	0.215	0.215	0.218	0.218	0.218	0.268	0.268	0.27	0.263	0.269	0.268	0.268	0.265	0.265	0.268	0.265	0.268	0.266	0.268	0.269	0.269	0.26	0.268	0.265	0.271	0.272	0.271	0.268	0.266	0.268	0.268	0.268	0.268	0.269
SO239_133_4_Ophioleucidae_sp_Species_29	0.219	0.216	0.216	0.213	0.218	0.219	0.219	0.218	0.218	0.218	0.218	0.219	0.216	0.218	0.216	0.216	0.219	0.219	0.218	0.218	0.265	0.265	0.267	0.263	0.26	0.265	0.265	0.262	0.262	0.265	0.262	0.265	0.263	0.265	0.266	0.266	0.257	0.265	0.262	0.268	0.269	0.268	0.265	0.263	0.268	0.265	0.265	0.265	0.266
SO239_158_2_Ophioleucidae_sp_Species_29	0.216	0.213	0.213	0.21	0.215	0.216	0.216	0.215	0.215	0.215	0.215	0.216	0.213	0.215	0.213	0.213	0.216	0.216	0.215	0.215	0.265	0.265	0.267	0.263	0.26	0.265	0.265	0.262	0.262	0.265	0.262	0.265	0.263	0.265	0.266	0.266	0.257	0.265	0.262	0.268	0.269	0.268	0.265	0.263	0.268	0.265	0.265	0.265	0.266
SO242_1_227_D6_Ophioleucidae_sp_Species_29	0.219	0.216	0.216	0.213	0.218	0.219	0.219	0.218	0.218	0.218	0.218	0.219	0.216	0.218	0.216	0.216	0.219	0.219	0.218	0.218	0.263	0.263	0.265	0.262	0.259	0.263	0.263	0.26	0.26	0.263	0.26	0.263	0.262	0.263	0.265	0.265	0.256	0.263	0.26	0.267	0.268	0.266	0.263	0.262	0.266	0.263	0.263	0.263	0.265
53_053_1_Ophioscolecidae_Species_29	0.213	0.213	0.213	0.213	0.215	0.216	0.213	0.216	0.216	0.218	0.215	0.216	0.213	0.215	0.213	0.213	0.213	0.216	0.218	0.218	0.266	0.266	0.268	0.262	0.268	0.266	0.266	0.263	0.263	0.266	0.263	0.266	0.265	0.266	0.268	0.268	0.259	0.266	0.263	0.27	0.271	0.269	0.266	0.265	0.266	0.266	0.266	0.266	0.268
53_175_3_Ophioleucidae_Species_29	0.219	0.216	0.216	0.213	0.218	0.219	0.219	0.218	0.218	0.218	0.218	0.219	0.216	0.218	0.216	0.216	0.219	0.219	0.218	0.218	0.265	0.265	0.267	0.263	0.26	0.265	0.265	0.262	0.262	0.265	0.262	0.265	0.263	0.265	0.266	0.266	0.257	0.265	0.262	0.268	0.269	0.268	0.265	0.263	0.268	0.265	0.265	0.265	0.266
53_175_6_Ophioleucidae_Species_29	0.218	0.215	0.215	0.212	0.216	0.218	0.218	0.216	0.216	0.216	0.216	0.218	0.215	0.216	0.215	0.215	0.218	0.218	0.216	0.216	0.265	0.265	0.267	0.263	0.26	0.265	0.265	0.262	0.262	0.265	0.262	0.265	0.263	0.265	0.266	0.266	0.257	0.265	0.262	0.268	0.269	0.268	0.265	0.263	0.268	0.265	0.265	0.265	0.266
AB1_EB5_4_Ophiotypa_simplex_Species_30	0.215	0.221	0.222	0.219	0.221	0.224	0.219	0.219	0.216	0.221	0.224	0.222	0.218	0.219	0.224	0.219	0.221	0.219	0.224	0.224	0.231	0.228	0.227	0.227	0.228	0.228	0.228	0.23	0.228	0.228	0.225	0.228	0.228	0.228	0.23	0.23	0.228	0.228	0.23	0.232	0.231	0.231	0.228	0.227	0.228	0.228	0.228	0.227	0.23
AB2_EB2_12_3_Ophiotypa_simplex_Species_30	0.216	0.222	0.224	0.221	0.222	0.225	0.221	0.221	0.218	0.222	0.225	0.224	0.219	0.221	0.225	0.221	0.222	0.224	0.224	0.224	0.227	0.224	0.223	0.222	0.224	0.224	0.224	0.225	0.224	0.224	0.221	0.224	0.224	0.224	0.225	0.225	0.224	0.224	0.225	0.227	0.227	0.227	0.224	0.222	0.224	0.224	0.224	0.222	0.225
AB2_EB1_16_3_Ophiotypa_simplex_Species_30	0.221	0.224	0.225	0.222	0.224	0.227	0.225	0.222	0.219	0.224	0.227	0.225	0.221	0.222	0.227	0.222	0.227	0.222	0.226	0.226	0.228	0.225	0.224	0.224	0.225	0.225	0.225	0.227	0.225	0.225	0.222	0.225	0.225	0.225	0.227	0.227	0.225	0.225	0.227	0.229	0.228	0.228	0.225	0.224	0.225	0.225	0.225	0.224	0.227
SO239_81_9_Ophiotypa_simplex_Species_30	0.219	0.225	0.227	0.224	0.225	0.228	0.224	0.224	0.221	0.225	0.228	0.227	0.222	0.224	0.228	0.224	0.225	0.224	0.228	0.228	0.228	0.225	0.224	0.224	0.225	0.225	0.225	0.227	0.225	0.225	0.222	0.225	0.225	0.225	0.227	0.227	0.225	0.225	0.227	0.229	0.228	0.228	0.225	0.224	0.225	0.225	0.225	0.224	0.227
KM_1307_Ophiotypa_simplex_Species_30	0.219	0.225	0.227	0.224	0.225	0.228	0.224	0.224	0.221	0.225	0.228	0.227	0.222	0.224	0.228	0.224	0.225	0.224	0.228	0.228	0.228	0.225	0.224	0.224	0.225	0.225	0.225	0.227	0.225	0.225	0.222	0.225	0.225	0.225	0.227	0.227	0.225	0.225	0.227	0.229	0.228	0.228	0.225	0.224	0.225	0.225	0.225	0.224	0.227
SO239_118_1_Ophiotypa_simplex_Species_30	0.219	0.225	0.227	0.224	0.225	0.228	0.224	0.224	0.221	0.225	0.228	0.227	0.222	0.224	0.228	0.224	0.225	0.224	0.228	0.228	0.227	0.224	0.223	0.222	0.224	0.224	0.224	0.225	0.224	0.224	0.221	0.224	0.224	0.224	0.225	0.225	0.224	0.224	0.225	0.227	0.227	0.227	0.224	0.222	0.224	0.224	0.224	0.222	0.225
MA14_21_12_Ophiernus_sp_Species_31	0.202	0.196	0.202	0.201	0.198	0.199	0.195	0.198	0.195	0.199	0.195	0.196	0.198	0.199	0.196	0.199	0.196	0.199	0.207	0.207	0.242	0.24	0.242	0.239	0.24	0.242	0.24	0.242	0.24	0.24	0.237	0.24	0.239	0.24	0.242	0.242	0.24	0.24	0.24	0.245	0.244	0.244	0.24	0.24	0.24	0.239	0.24	0.24	0.239
53_070_1_Ophiernus_adspersus_Species_31	0.202	0.199	0.202	0.201	0.198	0.199	0.198	0.198	0.198	0.202	0.195	0.199	0.198	0.202	0.196	0.199	0.196	0.199	0.207	0.207	0.233	0.234	0.236	0.236	0.237	0.236	0.234	0.233	0.234	0.234	0.231	0.234	0.233	0.234	0.236	0.236	0.234	0.234	0.234	0.239	0.237	0.237	0.234	0.234	0.237	0.233	0.234	0.237	0.233
53_70_02_Ophiernus_adspersus_Species_31	0.199	0.196	0.199	0.198	0.195	0.196	0.195	0.195	0.195	0.199	0.192	0.196	0.195	0.199	0.193	0.196	0.193	0.196	0.204	0.204	0.236	0.237	0.239	0.239	0.24	0.239	0.237	0.236	0.237	0.237	0.234	0.237	0.237	0.237	0.239	0.239	0.237	0.237	0.237	0.242	0.24	0.24	0.237	0.237	0.24	0.236	0.237	0.239	0.236
SO242_1_309_Ophiernus_sp_Species_31	0.199	0.199	0.199	0.201	0.198	0.199	0.198	0.198	0.198	0.202	0.195	0.199	0.195	0.204	0.196	0.196	0.193	0.199	0.202	0.202	0.231	0.233	0.235	0.237	0.236	0.234	0.233	0.231	0.233	0.233	0.233	0.233	0.231	0.233	0.234	0.234	0.233	0.233	0.233	0.238	0.236	0.236	0.233	0.233	0.236	0.231	0.233	0.236	0.231
SO239_192_6_Ophiuroidea_sp7_Species_32	0.229	0.229	0.234	0.239	0.229	0.235	0.232	0.231	0.232	0.239	0.232	0.232	0.232	0.229	0.231	0.231	0.237	0.231	0.235	0.235	0.242	0.24	0.24	0.239	0.245	0.24	0.237	0.24	0.242	0.239	0.237	0.239	0.239	0.24	0.24	0.237	0.245	0.239	0.239	0.24	0.239	0.24	0.24	0.239	0.24	0.237	0.239	0.239	0.24
AB1_EB5_10_9_Ophiohelidae_sp7_Species_33	0.274	0.269	0.271	0.274	0.269	0.272	0.274	0.268	0.268	0.263	0.266	0.272	0.269	0.268	0.266	0.271	0.274	0.274	0.271	0.271	0.272	0.272	0.276	0.271	0.274	0.272	0.272	0.274	0.272	0.272	0.269	0.272	0.272	0.272	0.274	0.274	0.269	0.274	0.269	0.276	0.277	0.272	0.272	0.274	0.275	0.269	0.272	0.274	0.272
MA14_21_3_Ophioscolecidae_sp_Species_34	0.253	0.253	0.254	0.256	0.254	0.257	0.254	0.256	0.253	0.254	0.256	0.257	0.253	0.253	0.251	0.253	0.254	0.256	0.242	0.242	0.274	0.274	0.276	0.271	0.279	0.274	0.274	0.269	0.275	0.274	0.271	0.274	0.274	0.272	0.271	0.275	0.271	0.274	0.271	0.273	0.279	0.274	0.274	0.272	0.275	0.274	0.274	0.275	0.274
AB2_EB1_13_6_Ophioleucidae_sp_Species_35	0.279	0.279	0.275	0.282	0.282	0.282	0.28	0.277	0.28	0.277	0.28	0.279	0.277	0.283	0.275	0.279	0.282	0.28	0.269	0.269	0.285	0.282	0.28	0.28	0.282	0.282	0.28	0.283	0.28	0.282	0.282	0.282	0.282	0.282	0.282	0.279	0.283	0.282	0.279	0.282	0.286	0.283	0.282	0.283	0.285	0.28	0.282	0.282	0.28
AB2_EB1_13_24_Ophioleucidae_sp_Species_35	0.279	0.279	0.275	0.282	0.282	0.282	0.28	0.277	0.28	0.277	0.28	0.279	0.277	0.283	0.275	0.279	0.282	0.28	0.269	0.269	0.285	0.282	0.28	0.28	0.282	0.282	0.28	0.283	0.28	0.282	0.282	0.282	0.282	0.282	0.282	0.279	0.283	0.282	0.279	0.282	0.286	0.283	0.282	0.283	0.285	0.28	0.282	0.282	0.28
MA14_66_12_Ophioleucidae_sp_Species_35	0.277	0.28	0.277	0.283	0.283	0.283	0.279	0.279	0.282	0.279	0.282	0.28	0.279	0.285	0.277	0.28	0.28	0.282	0.271	0.271	0.285	0.282	0.28	0.28	0.282	0.282	0.28	0.283	0.28	0.282	0.282	0.282	0.282	0.282	0.282	0.279	0.283	0.282	0.279	0.282	0.286	0.283	0.282	0.283	0.285	0.28	0.282	0.282	0.28
SO239_20_7_Ophioleucidae_sp_Species_35	0.277	0.28	0.277	0.283	0.283	0.283	0.279	0.279	0.282	0.279	0.282	0.28	0.279	0.285	0.277	0.28	0.28	0.282	0.271	0.271	0.285	0.282	0.28	0.28	0.282	0.282	0.28	0.283	0.28	0.282	0.282	0.282	0.282	0.282	0.282	0.279	0.283	0.282	0.279	0.282	0.286	0.283	0.282	0.283	0.285	0.28	0.282	0.282	0.28
SO239_24_5_Ophioleucidae_sp_Species_35	0.279	0.279	0.276	0.282	0.282	0.282	0.28	0.277	0.28	0.277	0.28	0.279	0.277	0.284	0.276	0.279	0.282	0.28	0.27	0.27	0.285	0.282	0.28	0.28	0.282	0.282	0.28	0.284	0.28	0.282	0.282	0.282	0.282	0.282	0.282	0.279	0.284	0.282	0.279	0.282	0.285	0.284	0.282	0.284	0.285	0.28	0.282	0.28	0.28
SO239_81_16_Ophioleucidae_sp_Species_35	0.279	0.279	0.275	0.282	0.282	0.282	0.28	0.277	0.28	0.277	0.28	0.279	0.277	0.283	0.275	0.279	0.282	0.28	0.269	0.269	0.285	0.282	0.28	0.28	0.282	0.282	0.28	0.283	0.28	0.282	0.282	0.282	0.282	0.282	0.28	0.279	0.283	0.282	0.279	0.282	0.286	0.282	0.282	0.283	0.285	0.28	0.282	0.282	0.28
SO239_81_25_Ophioleucidae_sp_Species_35	0.279	0.279	0.275	0.282	0.282	0.282	0.28	0.277	0.28	0.277	0.28	0.279	0.277	0.283	0.275	0.279	0.282	0.28	0.269	0.269	0.285	0.282	0.28	0.28	0.282	0.282	0.28	0.283	0.28	0.282	0.282	0.282	0.282	0.282	0.282	0.279	0.283	0.282	0.279	0.282	0.286	0.283	0.282	0.283	0.285	0.28	0.282	0.282	0.28
SO239_118_8_Ophioleucidae_sp_Species_35	0.279	0.279	0.275	0.282	0.282	0.282	0.28	0.277	0.28	0.277	0.28	0.279	0.277	0.283	0.275	0.279	0.282	0.28	0.269	0.269	0.285	0.282	0.28	0.28	0.282	0.282	0.28	0.283	0.28	0.282	0.282	0.282	0.282	0.282	0.282	0.279	0.283	0.282	0.279	0.282	0.286	0.283	0.282	0.283	0.285	0.28	0.282	0.282	0.28
SO239_118_14_Ophioleucidae_sp_Species_35	0.279	0.279	0.275	0.282	0.282	0.282	0.28	0.277	0.28	0.277	0.28	0.279	0.277	0.283	0.275	0.279	0.282	0.28	0.269	0.269	0.285	0.282	0.28	0.28	0.282	0.282	0.28	0.283	0.28	0.282	0.282	0.282	0.282	0.282	0.282	0.279	0.283	0.282	0.279	0.282	0.286	0.283	0.282	0.283	0.285	0.28	0.282	0.282	0.28
SO239_133_2_Ophioleucidae_sp_Species_35	0.279	0.279	0.275	0.282	0.282	0.282	0.28	0.277	0.28	0.277	0.28	0.279	0.277	0.283	0.275	0.279	0.282	0.28	0.269	0.269	0.285	0.282	0.28	0.28	0.282	0.282	0.28	0.283	0.28	0.282	0.282	0.282	0.282	0.282	0.282	0.279	0.283	0.282	0.279	0.282	0.286	0.283	0.282	0.283	0.285	0.28	0.282	0.282	0.28
AB1_EB5_3_Ophiosphalma_cf_glabrum_Species_36	0.219	0.222	0.218	0.228	0.218	0.222	0.222	0.225	0.222	0.225	0.227	0.222	0.219	0.225	0.221	0.218	0.221	0.222	0.215	0.215	0.216	0.213	0.21	0.215	0.213	0.213	0.212	0.216	0.213	0.213	0.213	0.213	0.213	0.213	0.215	0.212	0.209	0.212	0.212	0.216	0.215	0.216	0.213	0.215	0.216	0.21	0.213	0.212	0.212
AB1_EB3_9_2_Ophiosphalma_cf_glabrum_Species_36	0.221	0.224	0.218	0.23	0.219	0.224	0.224	0.228	0.224	0.227	0.228	0.224	0.221	0.227	0.222	0.219	0.222	0.224	0.216	0.216	0.219	0.216	0.213	0.218	0.216	0.216	0.215	0.219	0.216	0.216	0.216	0.216	0.216	0.216	0.218	0.215	0.212	0.215	0.215	0.22	0.218	0.219	0.216	0.218	0.216	0.213	0.216	0.215	0.215
AB1_EB5_10_2_Ophiosphalma_cf_glabrum_Species_36	0.219	0.222	0.218	0.228	0.219	0.224	0.225	0.231	0.222	0.225	0.227	0.222	0.219	0.225	0.221	0.218	0.221	0.222	0.216	0.216	0.213	0.21	0.207	0.212	0.21	0.21	0.209	0.213	0.21	0.21	0.21	0.21	0.21	0.21	0.212	0.209	0.207	0.209	0.209	0.213	0.212	0.213	0.21	0.212	0.21	0.207	0.21	0.209	0.209
AB1_EB4_11_3_Ophiosphalma_cf_glabrum_Species_36	0.222	0.225	0.221	0.231	0.221	0.225	0.225	0.231	0.225	0.228	0.23	0.225	0.222	0.228	0.224	0.221	0.224	0.225	0.218	0.218	0.218	0.215	0.212	0.216	0.215	0.215	0.213	0.218	0.215	0.215	0.215	0.215	0.215	0.215	0.216	0.213	0.21	0.213	0.213	0.218	0.216	0.218	0.215	0.216	0.215	0.212	0.215	0.213	0.213
AB2_EB1_14_2_Ophiosphalma_cf_glabrum_Species_36	0.219	0.219	0.215	0.225	0.215	0.219	0.219	0.225	0.219	0.222	0.224	0.219	0.216	0.222	0.218	0.215	0.218	0.219	0.212	0.212	0.221	0.218	0.215	0.219	0.218	0.218	0.216	0.221	0.218	0.218	0.218	0.218	0.218	0.218	0.219	0.216	0.213	0.216	0.216	0.221	0.219	0.221	0.218	0.219	0.218	0.215	0.218	0.216	0.216
AB2_EB2_15_14_Ophiosphalma_cf_glabrum_Species_36	0.225	0.228	0.224	0.234	0.224	0.228	0.228	0.234	0.228	0.231	0.233	0.228	0.225	0.231	0.227	0.224	0.227	0.228	0.221	0.221	0.215	0.212	0.209	0.213	0.212	0.212	0.21	0.215	0.212	0.212	0.212	0.212	0.212	0.212	0.213	0.21	0.207	0.21	0.21	0.215	0.213	0.215	0.212	0.213	0.212	0.209	0.212	0.21	0.21
AB2_EB1_16_4_Ophiosphalma_cf_glabrum_Species_36	0.222	0.225	0.221	0.231	0.221	0.225	0.225	0.231	0.225	0.228	0.228	0.225	0.222	0.228	0.224	0.221	0.224	0.225	0.218	0.218	0.218	0.215	0.212	0.216	0.215	0.215	0.213	0.218	0.215	0.215	0.215	0.215	0.215	0.215	0.216	0.213	0.21	0.213	0.213	0.218	0.216	0.218	0.215	0.216	0.215	0.212	0.215	0.213	0.213
NODBIO_33_10_Ophiosphalma_cf_glabrum_Species_36	0.219	0.222	0.218	0.228	0.218	0.222	0.222	0.228	0.222	0.225	0.227	0.222	0.219	0.225	0.221	0.218	0.221	0.222	0.215	0.215	0.216	0.213	0.21	0.212	0.213	0.213	0.212	0.216	0.213	0.213	0.213	0.213	0.213	0.213	0.215	0.212	0.209	0.212	0.212	0.216	0.215	0.216	0.213	0.215	0.213	0.21	0.213	0.212	0.212
NODBIO_33_7_Ophiosphalma_cf_glabrum_Species_36	0.222	0.225	0.221	0.231	0.221	0.225	0.225	0.231	0.225	0.228	0.23	0.225	0.222	0.228	0.224	0.221	0.224	0.225	0.218	0.218	0.216	0.213	0.21	0.215	0.213	0.213	0.212	0.216	0.213	0.213	0.213	0.213	0.213	0.213	0.215	0.212	0.209	0.212	0.212	0.216	0.215	0.216	0.213	0.215	0.213	0.21	0.213	0.212	0.212
MA13_07_7_Ophiosphalma_cf_glabrum_Species_36	0.224	0.227	0.222	0.231	0.222	0.227	0.227	0.23	0.227	0.23	0.231	0.227	0.224	0.23	0.225	0.222	0.225	0.224	0.22	0.22	0.218	0.215	0.212	0.213	0.215	0.215	0.213	0.218	0.215	0.215	0.215	0.215	0.215	0.215	0.216	0.213	0.21	0.213	0.213	0.218	0.216	0.218	0.215	0.216	0.212	0.212	0.215	0.213	0.213
MA13_85_41_Ophiosphalma_cf_glabrum_Species_36	0.219	0.222	0.218	0.228	0.218	0.222	0.222	0.228	0.222	0.222	0.227	0.222	0.219	0.225	0.221	0.218	0.221	0.222	0.215	0.215	0.213	0.21	0.207	0.212	0.21	0.21	0.209	0.213	0.21	0.21	0.21	0.21	0.21	0.21	0.212	0.209	0.205	0.209	0.209	0.213	0.212	0.213	0.21	0.212	0.21	0.207	0.21	0.209	0.209
MA14_20_3_Ophiosphalma_cf_glabrum_Species_36	0.225	0.228	0.224	0.234	0.224	0.228	0.228	0.231	0.228	0.231	0.233	0.228	0.225	0.231	0.227	0.224	0.227	0.228	0.221	0.221	0.216	0.213	0.21	0.215	0.213	0.213	0.212	0.216	0.213	0.213	0.213	0.213	0.213	0.213	0.215	0.212	0.209	0.212	0.212	0.216	0.215	0.216	0.213	0.215	0.213	0.21	0.213	0.212	0.212
MA14_21_2_Ophiosphalma_cf_glabrum_Species_36	0.225	0.228	0.224	0.234	0.224	0.228	0.228	0.234	0.228	0.231	0.233	0.228	0.225	0.231	0.227	0.224	0.227	0.228	0.218	0.218	0.219	0.216	0.213	0.218	0.216	0.216	0.215	0.219	0.216	0.216	0.216	0.216	0.216	0.216	0.218	0.215	0.212	0.215	0.215	0.22	0.218	0.219	0.216	0.218	0.216	0.213	0.216	0.215	0.215
MA14_38_15_Ophiosphalma_cf_glabrum_Species_36	0.224	0.224	0.222	0.233	0.222	0.227	0.227	0.233	0.224	0.227	0.231	0.227	0.224	0.227	0.225	0.222	0.225	0.227	0.218	0.218	0.216	0.213	0.21	0.215	0.213	0.213	0.212	0.216	0.213	0.213	0.213	0.213	0.213	0.213	0.215	0.212	0.209	0.212	0.212	0.216	0.215	0.216	0.213	0.215	0.213	0.21	0.213	0.212	0.212
SO239_24-1-1_Ophiosphalma_cf_glabrum_Species_36	0.218	0.221	0.216	0.227	0.216	0.221	0.221	0.227	0.221	0.224	0.225	0.221	0.218	0.224	0.219	0.216	0.219	0.221	0.213	0.213	0.213	0.21	0.207	0.212	0.21	0.21	0.209	0.213	0.21	0.21	0.21	0.21	0.21	0.21	0.212	0.209	0.205	0.209	0.209	0.213	0.212	0.213	0.21	0.212	0.21	0.207	0.21	0.209	0.209
SO239_24_18_Ophiosphalma_cf_glabrum_Species_36	0.218	0.221	0.216	0.227	0.216	0.221	0.221	0.227	0.221	0.224	0.225	0.221	0.218	0.224	0.219	0.216	0.219	0.221	0.215	0.215	0.215	0.215	0.212	0.216	0.215	0.215	0.213	0.218	0.215	0.215	0.215	0.215	0.215	0.215	0.216	0.213	0.21	0.213	0.213	0.218	0.216	0.218	0.215	0.216	0.215	0.212	0.215	0.213	0.213
SO239_50_10_Ophiosphalma_cf_glabrum_Species_36	0.221	0.221	0.216	0.227	0.216	0.221	0.221	0.224	0.222	0.224	0.225	0.221	0.218	0.224	0.219	0.216	0.219	0.221	0.213	0.213	0.216	0.213	0.21	0.215	0.213	0.213	0.212	0.216	0.213	0.213	0.213	0.213	0.213	0.213	0.215	0.212	0.209	0.212	0.212	0.216	0.215	0.216	0.213	0.215	0.213	0.21	0.213	0.212	0.212
SO239_2014_Ophiosphalma_cf_glabrum_Species_36	0.222	0.225	0.221	0.231	0.221	0.225	0.225	0.231	0.225	0.228	0.23	0.225	0.222	0.228	0.224	0.221	0.224	0.225	0.218	0.218	0.218	0.215	0.212	0.216	0.215	0.215	0.213	0.218	0.215	0.215	0.215	0.215	0.215	0.215	0.216	0.213	0.21	0.213	0.213	0.218	0.216	0.218	0.215	0.216	0.215	0.212	0.215	0.213	0.213
SO242_1_116_A5_Ophiosphalma_cf_glabrum_Species_36	0.221	0.224	0.219	0.23	0.219	0.224	0.224	0.23	0.224	0.227	0.228	0.224	0.221	0.227	0.222	0.219	0.222	0.224	0.216	0.216	0.216	0.213	0.21	0.215	0.213	0.213	0.212	0.216	0.213	0.213	0.213	0.213	0.213	0.213	0.215	0.212	0.209	0.212	0.212	0.216	0.215	0.216	0.213	0.215	0.213	0.21	0.213	0.212	0.212
SO242_1_076_Ophiosphalma_cf_glabrum_Species_36	0.222	0.224	0.224	0.231	0.221	0.225	0.225	0.228	0.224	0.23	0.23	0.225	0.222	0.227	0.224	0.221	0.224	0.225	0.218	0.218	0.212	0.209	0.206	0.21	0.209	0.209	0.207	0.212	0.209	0.209	0.209	0.209	0.209	0.209	0.21	0.207	0.207	0.207	0.21	0.212	0.21	0.212	0.209	0.21	0.209	0.205	0.209	0.207	0.207
SO242_2_154_Ophiosphalma_cf_glabrum_Species_36	0.221	0.224	0.219	0.23	0.219	0.224	0.224	0.23	0.224	0.227	0.228	0.224	0.221	0.227	0.222	0.219	0.222	0.224	0.216	0.216	0.216	0.213	0.21	0.215	0.213	0.213	0.212	0.216	0.213	0.213	0.213	0.213	0.213	0.213	0.215	0.212	0.209	0.212	0.212	0.216	0.215	0.216	0.213	0.215	0.213	0.21	0.213	0.212	0.212
53_224_3_2_Ophiosphalma_cf_glabrum_Species_36	0.225	0.228	0.224	0.234	0.224	0.228	0.227	0.234	0.228	0.231	0.233	0.228	0.225	0.231	0.227	0.224	0.227	0.228	0.221	0.221	0.219	0.216	0.213	0.218	0.216	0.216	0.215	0.219	0.216	0.216	0.216	0.216	0.216	0.216	0.218	0.215	0.212	0.215	0.215	0.22	0.218	0.219	0.216	0.218	0.216	0.213	0.216	0.215	0.215
SO239_139_2_Ophioleucidae_sp_Species_37	0.263	0.259	0.266	0.26	0.262	0.263	0.259	0.26	0.257	0.26	0.262	0.26	0.26	0.259	0.262	0.262	0.26	0.262	0.252	0.252	0.272	0.271	0.268	0.268	0.268	0.269	0.268	0.272	0.268	0.269	0.269	0.269	0.269	0.269	0.269	0.271	0.268	0.269	0.271	0.27	0.274	0.272	0.269	0.271	0.269	0.266	0.269	0.269	0.268
SO239_192_1_Ophioleucidae_sp_Species_37	0.262	0.257	0.265	0.259	0.26	0.262	0.257	0.259	0.259	0.262	0.26	0.259	0.259	0.26	0.26	0.26	0.259	0.26	0.25	0.25	0.275	0.274	0.271	0.271	0.271	0.272	0.271	0.275	0.271	0.272	0.272	0.272	0.272	0.272	0.272	0.274	0.271	0.272	0.274	0.273	0.277	0.275	0.272	0.274	0.272	0.269	0.272	0.272	0.271
SO239_192_3_Ophioleucidae_sp_Species_37	0.259	0.254	0.262	0.256	0.257	0.259	0.254	0.256	0.256	0.259	0.257	0.256	0.256	0.257	0.257	0.257	0.256	0.257	0.247	0.247	0.275	0.274	0.271	0.269	0.271	0.272	0.271	0.275	0.271	0.272	0.271	0.272	0.272	0.272	0.272	0.274	0.271	0.272	0.274	0.273	0.277	0.275	0.272	0.274	0.272	0.269	0.272	0.272	0.271
SO239_197_1_Ophioleucidae_sp_Species_37	0.266	0.262	0.266	0.263	0.265	0.266	0.262	0.263	0.263	0.266	0.265	0.262	0.263	0.265	0.265	0.265	0.263	0.265	0.253	0.253	0.277	0.275	0.273	0.272	0.272	0.274	0.272	0.277	0.272	0.274	0.274	0.274	0.274	0.274	0.274	0.275	0.269	0.274	0.275	0.274	0.279	0.277	0.274	0.275	0.274	0.271	0.274	0.274	0.272
SO239_200_1_Ophioleucidae_sp_Species_37	0.263	0.259	0.266	0.26	0.262	0.263	0.259	0.26	0.257	0.26	0.262	0.26	0.26	0.259	0.262	0.262	0.26	0.262	0.252	0.252	0.272	0.271	0.268	0.268	0.268	0.269	0.268	0.272	0.268	0.269	0.269	0.269	0.269	0.269	0.269	0.271	0.268	0.269	0.271	0.27	0.274	0.272	0.269	0.271	0.269	0.266	0.269	0.269	0.268
SO242_1_116_Ophioscolecidae_sp_New_Species_38	0.212	0.207	0.215	0.213	0.213	0.216	0.21	0.219	0.207	0.213	0.21	0.205	0.21	0.209	0.209	0.209	0.213	0.215	0.215	0.215	0.237	0.239	0.236	0.236	0.237	0.237	0.239	0.237	0.239	0.237	0.234	0.237	0.236	0.237	0.239	0.239	0.239	0.237	0.239	0.239	0.24	0.24	0.237	0.239	0.24	0.236	0.237	0.237	0.239
SO242_1_422_Ophioscolecidae_sp_New_Species_38	0.213	0.209	0.216	0.215	0.215	0.218	0.212	0.221	0.209	0.215	0.212	0.207	0.212	0.21	0.212	0.21	0.215	0.216	0.216	0.216	0.239	0.24	0.238	0.237	0.239	0.239	0.24	0.239	0.24	0.239	0.236	0.239	0.237	0.239	0.24	0.24	0.24	0.239	0.24	0.241	0.242	0.242	0.239	0.24	0.242	0.237	0.239	0.239	0.24
53_175_5_Ophioscolecidae_sp_Species_38	0.212	0.207	0.215	0.213	0.213	0.216	0.21	0.219	0.207	0.213	0.21	0.205	0.21	0.209	0.21	0.209	0.213	0.215	0.215	0.215	0.239	0.24	0.238	0.237	0.239	0.239	0.24	0.239	0.24	0.239	0.236	0.239	0.237	0.239	0.24	0.24	0.24	0.239	0.24	0.241	0.242	0.242	0.239	0.24	0.242	0.237	0.239	0.239	0.24
53_053_4_Ophioscolecidae_sp_Species_38	0.213	0.209	0.216	0.215	0.215	0.218	0.212	0.221	0.209	0.215	0.212	0.207	0.212	0.21	0.212	0.21	0.215	0.216	0.216	0.216	0.239	0.24	0.238	0.237	0.239	0.239	0.24	0.239	0.24	0.239	0.236	0.239	0.237	0.239	0.24	0.24	0.24	0.239	0.24	0.241	0.242	0.242	0.239	0.24	0.242	0.237	0.239	0.239	0.24
AB2_EB1_13_41_Ophiocymbium_sp_Species_39	0.189	0.189	0.189	0.19	0.187	0.19	0.19	0.186	0.189	0.186	0.189	0.189	0.19	0.192	0.195	0.189	0.187	0.189	0.192	0.192	0.248	0.25	0.25	0.247	0.253	0.248	0.248	0.247	0.25	0.248	0.247	0.248	0.25	0.25	0.25	0.25	0.245	0.248	0.245	0.25	0.25	0.251	0.25	0.248	0.251	0.247	0.248	0.253	0.25
MA13_18_5_Ophiocymbium_sp_Species_39	0.192	0.192	0.192	0.193	0.193	0.196	0.193	0.189	0.192	0.189	0.192	0.192	0.193	0.195	0.198	0.192	0.19	0.192	0.196	0.196	0.248	0.25	0.25	0.247	0.253	0.248	0.248	0.247	0.25	0.248	0.247	0.248	0.25	0.25	0.25	0.25	0.245	0.248	0.245	0.25	0.25	0.251	0.25	0.248	0.251	0.248	0.248	0.253	0.25
AB1_EB4_11_28_Ophiocymbium_sp_Species_40	0.221	0.218	0.221	0.222	0.221	0.224	0.221	0.221	0.213	0.216	0.222	0.221	0.219	0.221	0.224	0.218	0.218	0.221	0.228	0.228	0.253	0.256	0.255	0.253	0.253	0.256	0.256	0.251	0.25	0.254	0.253	0.254	0.254	0.254	0.256	0.256	0.259	0.253	0.254	0.259	0.256	0.256	0.254	0.253	0.254	0.251	0.254	0.256	0.256
MA13_85_17_Ophiocymbium_sp_Species_40	0.222	0.219	0.222	0.224	0.222	0.225	0.219	0.222	0.215	0.218	0.224	0.219	0.221	0.222	0.225	0.219	0.219	0.222	0.229	0.229	0.257	0.257	0.256	0.254	0.254	0.257	0.256	0.256	0.251	0.256	0.254	0.256	0.256	0.256	0.257	0.257	0.26	0.254	0.256	0.261	0.257	0.257	0.256	0.254	0.256	0.253	0.256	0.257	0.257
MA14_21_10_Ophiocymbium_sp_Species_40	0.224	0.221	0.221	0.224	0.222	0.225	0.224	0.224	0.216	0.218	0.224	0.222	0.222	0.224	0.227	0.221	0.221	0.224	0.229	0.229	0.259	0.262	0.261	0.259	0.259	0.262	0.26	0.257	0.256	0.26	0.259	0.26	0.259	0.26	0.262	0.262	0.26	0.259	0.257	0.264	0.262	0.262	0.26	0.259	0.26	0.257	0.26	0.263	0.262
SO239_24_15_Ophiocymbium_sp_Species_40	0.221	0.218	0.221	0.222	0.221	0.224	0.221	0.221	0.213	0.216	0.222	0.221	0.219	0.221	0.224	0.218	0.218	0.221	0.228	0.228	0.253	0.256	0.255	0.253	0.253	0.256	0.256	0.251	0.25	0.254	0.253	0.254	0.254	0.254	0.256	0.256	0.259	0.253	0.254	0.259	0.256	0.256	0.254	0.253	0.254	0.251	0.254	0.256	0.256
SO239_24_19_Ophiocymbium_sp_Species_40	0.23	0.224	0.227	0.227	0.225	0.228	0.225	0.224	0.219	0.222	0.227	0.222	0.225	0.227	0.23	0.224	0.23	0.227	0.228	0.228	0.257	0.254	0.256	0.257	0.254	0.257	0.256	0.256	0.251	0.256	0.254	0.256	0.254	0.256	0.257	0.257	0.26	0.254	0.256	0.261	0.257	0.257	0.256	0.254	0.259	0.253	0.256	0.259	0.257
53_204_2_Ophiocymbium_Species_40	0.231	0.222	0.228	0.225	0.224	0.227	0.227	0.225	0.218	0.221	0.225	0.224	0.227	0.225	0.228	0.225	0.228	0.225	0.228	0.228	0.248	0.251	0.25	0.248	0.248	0.251	0.25	0.25	0.245	0.25	0.248	0.25	0.25	0.25	0.251	0.251	0.256	0.248	0.25	0.255	0.251	0.251	0.25	0.248	0.25	0.247	0.25	0.251	0.251
SO239_81_4_Ophiotholia_sp_Species_41	0.247	0.242	0.236	0.239	0.24	0.242	0.24	0.239	0.244	0.239	0.236	0.234	0.24	0.244	0.24	0.24	0.244	0.24	0.236	0.236	0.306	0.304	0.303	0.303	0.304	0.306	0.304	0.306	0.304	0.304	0.301	0.304	0.304	0.304	0.306	0.304	0.298	0.304	0.303	0.308	0.309	0.307	0.304	0.306	0.301	0.303	0.304	0.303	0.306
SO239_192_5_Ophioleucidae_sp_Species_42	0.212	0.212	0.212	0.205	0.207	0.209	0.204	0.207	0.212	0.207	0.207	0.205	0.212	0.21	0.212	0.212	0.209	0.209	0.208	0.208	0.253	0.25	0.252	0.248	0.248	0.25	0.25	0.248	0.25	0.25	0.247	0.25	0.248	0.248	0.251	0.251	0.24	0.25	0.247	0.253	0.251	0.251	0.25	0.248	0.253	0.25	0.25	0.25	0.251
AB2_EB1_13_27_Ophiuroglypha_cf_polyacantha_Species_43	0.248	0.248	0.251	0.253	0.25	0.25	0.244	0.242	0.245	0.247	0.248	0.247	0.248	0.248	0.248	0.248	0.248	0.253	0.247	0.247	0.221	0.221	0.223	0.221	0.227	0.221	0.222	0.222	0.221	0.221	0.221	0.221	0.219	0.219	0.222	0.222	0.224	0.221	0.222	0.224	0.222	0.224	0.221	0.219	0.218	0.222	0.221	0.224	0.222
SO239_118_6_Ophiuroglypha_cf_polyacantha_Species_43	0.244	0.245	0.248	0.248	0.245	0.245	0.239	0.237	0.242	0.242	0.244	0.242	0.245	0.244	0.245	0.245	0.244	0.248	0.242	0.242	0.219	0.219	0.221	0.219	0.225	0.219	0.221	0.221	0.219	0.219	0.219	0.219	0.218	0.218	0.221	0.221	0.222	0.219	0.221	0.223	0.221	0.222	0.219	0.218	0.219	0.221	0.219	0.222	0.221
SO239_682_Ophiuroglypha_cf_polyacantha_Species_43	0.247	0.248	0.251	0.251	0.248	0.248	0.242	0.24	0.245	0.245	0.247	0.245	0.248	0.247	0.248	0.248	0.247	0.251	0.245	0.245	0.221	0.221	0.223	0.221	0.227	0.221	0.222	0.222	0.221	0.221	0.221	0.221	0.219	0.219	0.222	0.222	0.224	0.221	0.222	0.224	0.222	0.224	0.221	0.219	0.218	0.222	0.221	0.224	0.222
SO239_2037_Ophiuroglypha_cf_polyacantha_Species_43	0.247	0.248	0.251	0.251	0.248	0.248	0.242	0.24	0.245	0.245	0.247	0.245	0.248	0.247	0.248	0.248	0.247	0.251	0.245	0.245	0.221	0.221	0.223	0.221	0.227	0.221	0.222	0.222	0.221	0.221	0.221	0.221	0.219	0.219	0.222	0.222	0.224	0.221	0.222	0.224	0.222	0.224	0.221	0.219	0.218	0.222	0.221	0.224	0.222
Table S1A. Estimates (p-distance) of Evolutionary Divergence between Sequences
The number of base differences per site from between sequences are shown. The analysis involved 300 nucleotide sequences. Codon positions included were 1st+2nd+3rd+Noncoding. All ambiguous positions were removed for each sequence pair. There were a total of 657 positions in the final dataset. Evolutionary analyses were conducted in MEGA7.
[truncated: 250 more columns]

## Sheet: K2P
AB2_EB1_13_16_Ophiotholia_Species_1	1	2	3	4	5	6	7	8	9	10	11	12	13	14	15	16	17	18	19	20	21	22	23	24	25	26	27	28	29	30	31	32	33	34	35	36	37	38	39	40	41	42	43	44	45	46	47	48	49
AB2_EB1_13_20_Ophiotholia_Species_1	0.014
AB2_EB1_14_22_Ophiotholia_Species_1	0.017	0.014
AB2_EB2_15_12_Ophiotholia_Species_1	0.019	0.015	0.017
AB2_EB1_16_14_Ophiotholia_Species_1	0.012	0.009	0.012	0.012
NODBIO_33_9_Ophiotholia_Species_1	0.015	0.012	0.014	0.009	0.006
MA13_07_8_Ophiotholia_Species_1	0.014	0.014	0.019	0.014	0.011	0.014
MA13_18_6_Ophiotholia_Species_1	0.025	0.022	0.022	0.017	0.019	0.015	0.02
MA13_85_3_Ophiotholia_Species_1	0.019	0.008	0.019	0.017	0.014	0.014	0.019	0.023
MA13_90_18_Ophiotholia_Species_1	0.02	0.014	0.019	0.014	0.014	0.014	0.019	0.022	0.012
MA14_38_13_Ophiotholia_Species_1	0.019	0.015	0.02	0.012	0.012	0.012	0.014	0.022	0.017	0.017
MA14_39_2_Ophiotholia_Species_1	0.015	0.011	0.019	0.014	0.011	0.014	0.009	0.023	0.012	0.019	0.014
MA14_66_16_Ophiotholia_Species_1	0.011	0.008	0.009	0.011	0.008	0.008	0.012	0.017	0.009	0.012	0.011	0.012
MA14_67_4_Ophiotholia_Species_1	0.015	0.011	0.02	0.015	0.012	0.012	0.017	0.022	0.009	0.011	0.015	0.015	0.011
SO239_20_11_Ophiotholia_Species_1	0.017	0.011	0.012	0.011	0.011	0.008	0.015	0.017	0.012	0.015	0.014	0.015	0.006	0.014
SO239_24_24_Ophiotholia_Species_1	0.009	0.006	0.008	0.012	0.006	0.009	0.011	0.019	0.011	0.014	0.012	0.011	0.002	0.012	0.008
SO239_50_5_Ophiotholia_Species_1	0.011	0.014	0.012	0.011	0.011	0.008	0.012	0.017	0.015	0.015	0.014	0.015	0.006	0.014	0.009	0.008
SO239_59_3_Ophiotholia_Species_1	0.014	0.009	0.015	0.014	0.006	0.012	0.014	0.022	0.014	0.017	0.015	0.011	0.011	0.014	0.014	0.009	0.014
KU519565.1_NHM_303_Ophiotholia_Species_1	0.015	0.013	0.013	0.011	0.01	0.008	0.011	0.015	0.015	0.015	0.013	0.015	0.006	0.011	0.01	0.008	0.008	0.013
KU519566.1_NHM_371_Ophiotholia_Species_1	0.015	0.013	0.013	0.011	0.01	0.008	0.011	0.015	0.015	0.015	0.013	0.015	0.006	0.011	0.01	0.008	0.008	0.013	0
AB1_EB5_10_4_Amphioplus_daleus_Species_2	0.268	0.272	0.272	0.279	0.272	0.275	0.275	0.279	0.27	0.27	0.275	0.279	0.268	0.27	0.275	0.268	0.272	0.272	0.264	0.264
AB1_EB4_11_17_Amphioplus_daleus_Species_2	0.275	0.279	0.279	0.286	0.279	0.281	0.277	0.286	0.277	0.277	0.281	0.281	0.275	0.277	0.281	0.275	0.279	0.279	0.269	0.269	0.005
AB2_EB2_12_11_Amphioplus_daleus_Species_2	0.271	0.275	0.275	0.282	0.275	0.277	0.273	0.282	0.273	0.273	0.277	0.277	0.271	0.273	0.277	0.271	0.275	0.275	0.265	0.265	0.006	0.005
AB2_EB1_13_26_Amphioplus_daleus_Species_2	0.27	0.275	0.275	0.281	0.275	0.277	0.272	0.281	0.272	0.272	0.277	0.277	0.27	0.272	0.277	0.27	0.275	0.275	0.267	0.267	0.008	0.006	0.008
AB2_EB1_14_3_Amphioplus_daleus_Species_2	0.275	0.279	0.279	0.281	0.279	0.281	0.277	0.283	0.275	0.272	0.281	0.281	0.275	0.277	0.281	0.275	0.279	0.279	0.269	0.269	0.009	0.008	0.009	0.011
AB2_EB2_15_10_Amphioplus_daleus_Species_2	0.272	0.277	0.277	0.284	0.277	0.279	0.275	0.283	0.275	0.275	0.279	0.279	0.272	0.275	0.279	0.272	0.277	0.277	0.267	0.267	0.005	0.003	0.005	0.005	0.008
AB2_EB1_16_13_Amphioplus_daleus_Species_2	0.27	0.275	0.275	0.281	0.275	0.277	0.272	0.281	0.272	0.272	0.277	0.277	0.27	0.272	0.277	0.27	0.275	0.275	0.264	0.264	0.006	0.005	0.006	0.008	0.009	0.005
NODBIO_33_1_Amphioplus_daleus_Species_2	0.27	0.274	0.275	0.281	0.275	0.277	0.277	0.281	0.272	0.272	0.277	0.281	0.27	0.272	0.277	0.27	0.274	0.275	0.264	0.264	0.005	0.006	0.008	0.009	0.011	0.006	0.008
NODBIO_33_18_Amphioplus_daleus_Species_2	0.275	0.279	0.279	0.286	0.279	0.281	0.277	0.286	0.277	0.277	0.281	0.281	0.275	0.277	0.281	0.275	0.279	0.279	0.269	0.269	0.014	0.012	0.014	0.015	0.017	0.012	0.011	0.014
NODBIO_101_1_Amphioplus_daleus_Species_2	0.272	0.277	0.277	0.284	0.277	0.279	0.275	0.283	0.275	0.275	0.279	0.279	0.272	0.275	0.279	0.272	0.277	0.277	0.267	0.267	0.003	0.002	0.003	0.005	0.006	0.002	0.003	0.005	0.011
NODBIO_101_9_Amphioplus_daleus_Species_2	0.272	0.277	0.277	0.283	0.277	0.279	0.275	0.283	0.274	0.275	0.279	0.279	0.272	0.275	0.279	0.272	0.277	0.277	0.269	0.269	0.006	0.005	0.006	0.005	0.009	0.005	0.006	0.008	0.012	0.003
MA13_07_1_Amphioplus_daleus_Species_2	0.272	0.277	0.277	0.284	0.277	0.279	0.275	0.283	0.275	0.275	0.279	0.279	0.272	0.275	0.279	0.272	0.277	0.277	0.267	0.267	0.003	0.002	0.003	0.005	0.006	0.002	0.003	0.005	0.011	0	0.003
MA13_18_3_Amphioplus_daleus_Species_2	0.275	0.279	0.279	0.286	0.279	0.281	0.277	0.286	0.277	0.277	0.281	0.281	0.275	0.277	0.281	0.275	0.279	0.279	0.269	0.269	0.005	0.003	0.005	0.006	0.008	0.003	0.005	0.006	0.012	0.002	0.005	0.002
MA13_85_20_Amphioplus_daleus_Species_2	0.275	0.279	0.279	0.286	0.279	0.281	0.277	0.286	0.277	0.277	0.281	0.281	0.275	0.277	0.281	0.275	0.279	0.279	0.269	0.269	0.005	0.003	0.005	0.006	0.008	0.003	0.005	0.003	0.011	0.002	0.005	0.002	0.003
MA13_90_12_Amphioplus_daleus_Species_2	0.275	0.279	0.279	0.286	0.279	0.281	0.277	0.286	0.277	0.277	0.281	0.281	0.275	0.277	0.281	0.275	0.279	0.279	0.267	0.267	0.006	0.005	0.006	0.008	0.009	0.005	0.003	0.008	0.011	0.003	0.006	0.003	0.005	0.005
MA14_21_6_Amphioplus_daleus_Species_2	0.275	0.279	0.277	0.286	0.279	0.281	0.277	0.286	0.277	0.277	0.281	0.281	0.275	0.277	0.281	0.275	0.279	0.279	0.269	0.269	0.006	0.005	0.006	0.008	0.009	0.005	0.006	0.008	0.014	0.003	0.006	0.003	0.005	0.005	0.006
MA14_38_44_Amphioplus_daleus_Species_2	0.279	0.283	0.279	0.29	0.283	0.286	0.279	0.288	0.281	0.277	0.286	0.283	0.279	0.281	0.283	0.279	0.283	0.283	0.271	0.271	0.017	0.015	0.017	0.019	0.02	0.015	0.017	0.014	0.022	0.014	0.014	0.014	0.015	0.012	0.017	0.017
MA14_66_4_Amphioplus_daleus_Species_2	0.272	0.277	0.277	0.284	0.277	0.279	0.275	0.283	0.275	0.275	0.279	0.279	0.272	0.275	0.279	0.272	0.277	0.277	0.267	0.267	0.005	0.003	0.002	0.006	0.008	0.003	0.005	0.006	0.012	0.002	0.005	0.002	0.003	0.003	0.005	0.005	0.015
MA14_67_8_Amphioplus_daleus_Species_2	0.272	0.277	0.272	0.284	0.277	0.279	0.275	0.283	0.275	0.27	0.279	0.279	0.272	0.275	0.279	0.272	0.277	0.277	0.269	0.269	0.006	0.005	0.006	0.008	0.009	0.005	0.006	0.008	0.014	0.003	0.006	0.003	0.005	0.005	0.006	0.006	0.014	0.005
SO239_20_2_Amphioplus_daleus_Species_2	0.273	0.277	0.277	0.284	0.277	0.28	0.275	0.284	0.275	0.28	0.28	0.28	0.273	0.275	0.28	0.273	0.277	0.277	0.267	0.267	0.008	0.006	0.008	0.008	0.011	0.003	0.008	0.009	0.015	0.005	0.008	0.005	0.006	0.006	0.008	0.008	0.019	0.006	0.008
SO239_24-1_6_Amphioplus_daleus_Species_2	0.277	0.281	0.281	0.288	0.281	0.283	0.279	0.288	0.279	0.279	0.284	0.283	0.277	0.279	0.283	0.277	0.281	0.281	0.271	0.271	0.008	0.006	0.006	0.009	0.011	0.006	0.008	0.009	0.015	0.005	0.008	0.005	0.006	0.006	0.008	0.008	0.019	0.006	0.008	0.008
SO239_24_23_Amphioplus_daleus_Species_2	0.277	0.281	0.281	0.288	0.281	0.283	0.279	0.288	0.279	0.279	0.284	0.283	0.277	0.279	0.283	0.277	0.281	0.281	0.269	0.269	0.006	0.005	0.006	0.008	0.009	0.005	0.006	0.008	0.014	0.003	0.006	0.003	0.005	0.005	0.003	0.006	0.017	0.005	0.006	0.008	0.008
SO239_50_4_Amphioplus_daleus_Species_2	0.275	0.279	0.279	0.286	0.279	0.281	0.277	0.286	0.277	0.277	0.281	0.281	0.275	0.277	0.281	0.275	0.279	0.279	0.269	0.269	0.005	0.003	0.005	0.006	0.008	0.003	0.005	0.005	0.009	0.002	0.005	0.002	0.003	0.002	0.005	0.005	0.014	0.003	0.005	0.006	0.006	0.005
SO239_81_2_Amphioplus_daleus_Species_2	0.272	0.277	0.277	0.284	0.277	0.279	0.275	0.283	0.275	0.275	0.279	0.279	0.272	0.275	0.279	0.272	0.277	0.277	0.267	0.267	0.005	0.003	0.005	0.006	0.008	0.003	0.005	0.006	0.012	0.002	0.005	0.002	0.003	0.003	0.005	0.005	0.015	0.003	0.005	0.006	0.006	0.005	0.003
SO239_81_20_Amphioplus_daleus_Species_2	0.277	0.281	0.281	0.288	0.281	0.283	0.279	0.288	0.279	0.279	0.284	0.283	0.277	0.279	0.283	0.277	0.281	0.281	0.271	0.271	0.006	0.005	0.006	0.005	0.009	0.005	0.006	0.008	0.014	0.003	0.006	0.003	0.005	0.005	0.006	0.006	0.017	0.005	0.006	0.008	0.008	0.006	0.005	0.005
SO239_118_2_Amphioplus_daleus_Species_2	0.27	0.274	0.275	0.281	0.275	0.277	0.272	0.281	0.272	0.272	0.277	0.277	0.27	0.272	0.277	0.27	0.274	0.275	0.264	0.264	0.006	0.005	0.006	0.008	0.009	0.005	0.006	0.008	0.011	0.003	0.006	0.003	0.005	0.005	0.006	0.006	0.017	0.005	0.006	0.008	0.008	0.006	0.005	0.005	0.006
SO239_133_8_Amphioplus_daleus_Species_2	0.272	0.277	0.277	0.284	0.277	0.279	0.275	0.283	0.275	0.275	0.279	0.279	0.272	0.275	0.279	0.272	0.277	0.277	0.267	0.267	0.003	0.002	0.003	0.005	0.006	0.002	0.003	0.005	0.011	0	0.003	0	0.002	0.002	0.003	0.003	0.014	0.002	0.003	0.005	0.005	0.003	0.002	0.002	0.003	0.003
SO239_171_2_Amphioplus_daleus_Species_2	0.275	0.279	0.279	0.286	0.279	0.281	0.277	0.286	0.277	0.277	0.281	0.281	0.275	0.277	0.281	0.275	0.279	0.279	0.269	0.269	0.008	0.006	0.006	0.009	0.008	0.006	0.008	0.009	0.015	0.005	0.008	0.005	0.005	0.006	0.008	0.008	0.019	0.006	0.008	0.008	0.006	0.008	0.006	0.006	0.008	0.008	0.005
SO239_158_1B_Amphioplus_daleus_Species_2	0.27	0.275	0.275	0.281	0.275	0.277	0.272	0.281	0.272	0.272	0.277	0.277	0.27	0.272	0.277	0.27	0.275	0.275	0.264	0.264	0.005	0.003	0.005	0.006	0.008	0.003	0.005	0.006	0.012	0.002	0.005	0.002	0.003	0.003	0.005	0.005	0.015	0.003	0.005	0.006	0.006	0.005	0.003	0.003	0.005	0.005	0.002	0.006
53_053_2_Amphioplus_daleus_Species_2	0.272	0.277	0.277	0.284	0.277	0.279	0.275	0.283	0.275	0.275	0.279	0.279	0.272	0.275	0.279	0.272	0.277	0.277	0.267	0.267	0.003	0.002	0.003	0.005	0.006	0.002	0.003	0.005	0.011	0	0.003	0	0.002	0.002	0.003	0.003	0.014	0.002	0.003	0.005	0.005	0.003	0.002	0.002	0.003	0.003	0	0.005	0.002
SO242_1_181_D4_Amphioplus_daleus_Species_2	0.27	0.275	0.275	0.281	0.275	0.277	0.272	0.281	0.272	0.272	0.277	0.277	0.27	0.272	0.277	0.27	0.275	0.275	0.264	0.264	0.005	0.003	0.005	0.006	0.008	0.003	0.005	0.006	0.012	0.002	0.005	0.002	0.003	0.003	0.005	0.005	0.015	0.003	0.005	0.006	0.006	0.005	0.003	0.003	0.005	0.005	0.002	0.006	0.003
SO242_1_227_D5_Amphioplus_daleus_Species_2	0.266	0.27	0.27	0.277	0.27	0.272	0.268	0.277	0.268	0.268	0.272	0.272	0.266	0.268	0.272	0.266	0.27	0.27	0.26	0.26	0.011	0.009	0.011	0.012	0.014	0.009	0.011	0.012	0.019	0.008	0.011	0.008	0.009	0.009	0.011	0.011	0.022	0.009	0.011	0.012	0.012	0.011	0.009	0.006	0.011	0.011	0.008	0.012	0.009
SO242_1_387_B6_Amphioplus_daleus_Species_2	0.275	0.279	0.279	0.286	0.279	0.281	0.277	0.286	0.277	0.277	0.281	0.281	0.275	0.277	0.281	0.275	0.279	0.279	0.269	0.269	0.005	0.003	0.005	0.006	0.008	0.003	0.005	0.006	0.012	0.002	0.005	0.002	0.003	0.003	0.005	0.005	0.015	0.003	0.005	0.006	0.006	0.005	0.003	0.003	0.005	0.005	0.002	0.006	0.003
KU519544.1_NHM_094_Amphioplus_daleus_Species_2	0.256	0.258	0.258	0.267	0.258	0.261	0.256	0.266	0.256	0.256	0.261	0.261	0.256	0.256	0.261	0.256	0.261	0.258	0.258	0.258	0.002	0.002	0.004	0.004	0.008	0.002	0.002	0.006	0.013	0	0.002	0	0.002	0.002	0.002	0.004	0.011	0.002	0	0.006	0.002	0.002	0.002	0	0.004	0.004	0	0.004	0
KU519545.1_NHM_447_Amphioplus_daleus_Species_2	0.255	0.257	0.257	0.266	0.257	0.26	0.255	0.265	0.255	0.255	0.26	0.26	0.255	0.255	0.26	0.255	0.26	0.257	0.257	0.257	0.002	0.002	0.004	0.004	0.008	0.002	0.002	0.006	0.013	0	0.002	0	0.002	0.002	0.002	0.004	0.011	0.002	0	0.006	0.002	0.002	0.002	0	0.004	0.004	0	0.004	0
SO242_2_222_F2_Ophiosphalma_glabrum_Species_3	0.26	0.264	0.262	0.268	0.257	0.264	0.268	0.273	0.268	0.273	0.27	0.264	0.259	0.268	0.262	0.257	0.262	0.257	0.26	0.26	0.26	0.255	0.251	0.251	0.257	0.255	0.253	0.26	0.255	0.255	0.251	0.255	0.255	0.255	0.257	0.253	0.255	0.253	0.257	0.26	0.257	0.26	0.255	0.253	0.257	0.251	0.255	0.253	0.253
AB1_EB5_10_7_Ophiosphalma_glabrum_Species_3	0.259	0.264	0.261	0.268	0.257	0.264	0.268	0.272	0.268	0.273	0.27	0.264	0.259	0.268	0.262	0.257	0.262	0.261	0.26	0.26	0.249	0.245	0.241	0.24	0.247	0.245	0.242	0.249	0.245	0.245	0.24	0.245	0.245	0.245	0.247	0.242	0.245	0.242	0.247	0.249	0.247	0.249	0.245	0.242	0.247	0.24	0.245	0.243	0.242
AB2_EB1_14_8_Ophiosphalma_glabrum_Species_3	0.262	0.266	0.264	0.266	0.259	0.266	0.266	0.275	0.27	0.275	0.268	0.262	0.262	0.27	0.264	0.259	0.264	0.259	0.262	0.262	0.26	0.255	0.251	0.251	0.257	0.255	0.253	0.26	0.255	0.255	0.251	0.255	0.255	0.255	0.257	0.253	0.255	0.253	0.257	0.26	0.257	0.26	0.255	0.253	0.257	0.251	0.255	0.253	0.253
AB2_EB1_14_13_Ophiosphalma_glabrum_Species_3	0.262	0.266	0.264	0.27	0.259	0.266	0.27	0.275	0.27	0.275	0.273	0.266	0.262	0.27	0.264	0.259	0.264	0.259	0.262	0.262	0.253	0.249	0.245	0.245	0.251	0.249	0.247	0.253	0.249	0.249	0.245	0.249	0.249	0.249	0.251	0.247	0.249	0.247	0.251	0.254	0.251	0.253	0.249	0.247	0.251	0.245	0.249	0.247	0.247
AB2_EB1_13_18_Ophiosphalma_glabrum_Species_3	0.257	0.266	0.264	0.271	0.259	0.266	0.266	0.27	0.27	0.275	0.273	0.266	0.262	0.273	0.264	0.259	0.26	0.259	0.262	0.262	0.26	0.255	0.251	0.251	0.257	0.255	0.253	0.26	0.255	0.255	0.251	0.255	0.255	0.255	0.257	0.253	0.255	0.253	0.257	0.26	0.257	0.26	0.255	0.253	0.257	0.251	0.255	0.253	0.253
AB2_EB1_16_10_Ophiosphalma_glabrum_Species_3	0.26	0.264	0.262	0.264	0.257	0.264	0.264	0.273	0.268	0.273	0.266	0.259	0.259	0.268	0.262	0.257	0.262	0.257	0.26	0.26	0.257	0.253	0.249	0.249	0.255	0.253	0.251	0.258	0.253	0.253	0.249	0.253	0.253	0.253	0.255	0.251	0.253	0.251	0.255	0.258	0.255	0.257	0.253	0.251	0.255	0.249	0.253	0.251	0.251
NODBIO_80_2_Ophiosphalma_glabrum_Species_3	0.264	0.268	0.266	0.273	0.262	0.268	0.273	0.277	0.273	0.277	0.273	0.268	0.264	0.273	0.266	0.262	0.266	0.266	0.265	0.265	0.262	0.258	0.254	0.253	0.26	0.258	0.255	0.262	0.258	0.258	0.253	0.258	0.258	0.258	0.26	0.255	0.258	0.255	0.26	0.262	0.26	0.262	0.258	0.255	0.26	0.253	0.258	0.255	0.255
MA13_07_2_Ophiosphalma_glabrum_Species_3	0.264	0.268	0.266	0.273	0.262	0.268	0.273	0.277	0.273	0.277	0.275	0.268	0.264	0.273	0.266	0.262	0.266	0.262	0.265	0.265	0.264	0.26	0.256	0.255	0.262	0.26	0.258	0.264	0.26	0.26	0.255	0.26	0.26	0.26	0.262	0.258	0.26	0.258	0.262	0.265	0.262	0.264	0.26	0.258	0.262	0.255	0.26	0.258	0.258
MA13_85_7_Ophiosphalma_glabrum_Species_3	0.26	0.264	0.262	0.268	0.257	0.264	0.268	0.273	0.268	0.273	0.27	0.264	0.259	0.268	0.262	0.257	0.262	0.262	0.26	0.26	0.255	0.251	0.247	0.247	0.253	0.251	0.249	0.255	0.251	0.251	0.247	0.251	0.251	0.251	0.253	0.249	0.251	0.249	0.253	0.256	0.253	0.255	0.251	0.249	0.253	0.247	0.251	0.249	0.249
MA13_90_1_Ophiosphalma_glabrum_Species_3	0.26	0.264	0.262	0.264	0.257	0.264	0.264	0.273	0.268	0.273	0.266	0.259	0.259	0.268	0.262	0.257	0.262	0.257	0.26	0.26	0.26	0.255	0.251	0.251	0.257	0.255	0.253	0.26	0.255	0.255	0.251	0.255	0.255	0.255	0.257	0.253	0.255	0.253	0.257	0.26	0.257	0.26	0.255	0.253	0.257	0.251	0.255	0.253	0.253
MA14_21_7_Ophiosphalma_glabrum_Species_3	0.262	0.266	0.264	0.27	0.259	0.266	0.27	0.275	0.27	0.275	0.273	0.266	0.262	0.27	0.264	0.259	0.264	0.264	0.262	0.262	0.258	0.253	0.249	0.249	0.255	0.253	0.251	0.258	0.253	0.253	0.249	0.253	0.253	0.253	0.255	0.251	0.253	0.251	0.255	0.258	0.255	0.257	0.253	0.251	0.255	0.249	0.253	0.251	0.251
MA14_38_12_Ophiosphalma_glabrum_Species_3	0.259	0.264	0.262	0.268	0.257	0.264	0.268	0.273	0.268	0.273	0.27	0.264	0.259	0.268	0.262	0.257	0.262	0.257	0.26	0.26	0.258	0.253	0.249	0.249	0.255	0.253	0.251	0.258	0.253	0.253	0.249	0.253	0.253	0.253	0.255	0.251	0.253	0.251	0.255	0.258	0.255	0.257	0.253	0.251	0.255	0.249	0.253	0.251	0.251
MA14_67_11_Ophiosphalma_glabrum_Species_3	0.262	0.266	0.264	0.27	0.259	0.266	0.27	0.275	0.27	0.275	0.273	0.266	0.262	0.27	0.264	0.259	0.264	0.259	0.26	0.26	0.26	0.255	0.251	0.251	0.258	0.255	0.253	0.26	0.255	0.255	0.251	0.255	0.255	0.255	0.253	0.253	0.255	0.253	0.257	0.26	0.258	0.255	0.255	0.253	0.258	0.251	0.255	0.253	0.253
SO239_20_18_Ophiosphalma_glabrum_Species_3	0.259	0.264	0.262	0.262	0.257	0.264	0.264	0.268	0.268	0.271	0.266	0.259	0.259	0.268	0.262	0.257	0.262	0.262	0.26	0.26	0.258	0.253	0.249	0.249	0.253	0.253	0.251	0.258	0.253	0.253	0.249	0.253	0.253	0.253	0.255	0.251	0.253	0.251	0.255	0.258	0.255	0.257	0.253	0.251	0.255	0.249	0.253	0.251	0.251
SO239_24_4_Ophiosphalma_glabrum_Species_3	0.259	0.264	0.262	0.264	0.257	0.264	0.264	0.273	0.268	0.273	0.266	0.259	0.259	0.268	0.262	0.257	0.262	0.262	0.26	0.26	0.258	0.253	0.249	0.249	0.255	0.253	0.251	0.258	0.253	0.253	0.249	0.253	0.253	0.253	0.255	0.251	0.253	0.251	0.255	0.258	0.255	0.257	0.253	0.251	0.255	0.249	0.253	0.251	0.251
SO239_50_2_Ophiosphalma_glabrum_Species_3	0.262	0.266	0.264	0.266	0.259	0.266	0.266	0.275	0.27	0.275	0.268	0.262	0.262	0.271	0.26	0.259	0.264	0.259	0.262	0.262	0.262	0.257	0.254	0.253	0.26	0.257	0.255	0.262	0.257	0.257	0.253	0.257	0.257	0.258	0.26	0.255	0.258	0.255	0.26	0.262	0.26	0.262	0.257	0.255	0.26	0.253	0.257	0.255	0.255
SO239_59_16_Ophiosphalma_glabrum_Species_3	0.257	0.262	0.259	0.266	0.255	0.262	0.266	0.27	0.266	0.271	0.268	0.262	0.257	0.266	0.26	0.255	0.26	0.259	0.258	0.258	0.26	0.255	0.251	0.251	0.257	0.255	0.253	0.26	0.255	0.255	0.251	0.255	0.255	0.255	0.257	0.253	0.255	0.253	0.257	0.26	0.257	0.26	0.255	0.253	0.257	0.251	0.255	0.253	0.253
SO239_81_8_Ophiosphalma_glabrum_Species_3	0.26	0.264	0.262	0.264	0.257	0.264	0.264	0.273	0.268	0.273	0.266	0.259	0.259	0.268	0.262	0.257	0.262	0.257	0.26	0.26	0.26	0.255	0.251	0.251	0.257	0.255	0.253	0.26	0.255	0.255	0.251	0.255	0.255	0.255	0.257	0.253	0.255	0.253	0.257	0.26	0.257	0.26	0.255	0.253	0.257	0.251	0.255	0.253	0.253
SO239_118_15_Ophiosphalma_glabrum_Species_3	0.262	0.266	0.264	0.266	0.259	0.266	0.266	0.275	0.27	0.275	0.268	0.262	0.262	0.271	0.264	0.259	0.264	0.259	0.262	0.262	0.262	0.257	0.254	0.253	0.26	0.257	0.255	0.262	0.257	0.257	0.253	0.257	0.257	0.258	0.26	0.255	0.258	0.255	0.26	0.262	0.26	0.262	0.257	0.255	0.26	0.253	0.257	0.255	0.255
SO239_128_Ophiosphalma_glabrum_Species_3	0.262	0.266	0.264	0.266	0.259	0.266	0.266	0.275	0.27	0.275	0.268	0.262	0.262	0.271	0.264	0.259	0.264	0.259	0.262	0.262	0.26	0.255	0.251	0.251	0.257	0.255	0.253	0.26	0.255	0.255	0.251	0.255	0.255	0.255	0.257	0.253	0.255	0.253	0.257	0.26	0.257	0.26	0.255	0.253	0.257	0.251	0.255	0.253	0.253
SO239_132_Ophiosphalma_glabrum_Species_3	0.262	0.266	0.264	0.266	0.259	0.266	0.266	0.275	0.27	0.275	0.268	0.262	0.262	0.271	0.264	0.259	0.264	0.259	0.262	0.262	0.26	0.255	0.251	0.251	0.257	0.255	0.253	0.26	0.255	0.255	0.251	0.255	0.255	0.255	0.257	0.253	0.255	0.253	0.257	0.26	0.257	0.26	0.255	0.253	0.257	0.251	0.255	0.253	0.253
SO239_131_1_Ophiosphalma_glabrum_Species_3	0.257	0.262	0.26	0.262	0.255	0.262	0.262	0.266	0.266	0.275	0.264	0.257	0.257	0.266	0.26	0.255	0.26	0.255	0.258	0.258	0.26	0.255	0.251	0.251	0.258	0.255	0.253	0.26	0.255	0.255	0.251	0.255	0.255	0.255	0.258	0.253	0.256	0.253	0.258	0.256	0.253	0.26	0.255	0.253	0.258	0.251	0.255	0.253	0.253
SO239_410_Ophiosphalma_glabrum_Species_3	0.26	0.264	0.262	0.268	0.257	0.264	0.268	0.273	0.268	0.273	0.27	0.264	0.259	0.268	0.262	0.257	0.262	0.257	0.26	0.26	0.255	0.251	0.247	0.247	0.253	0.251	0.249	0.255	0.251	0.251	0.247	0.251	0.251	0.251	0.253	0.249	0.251	0.249	0.253	0.256	0.253	0.255	0.251	0.249	0.253	0.247	0.251	0.249	0.249
674_new_Ophiosphalma_glabrum_Species_3	0.258	0.262	0.26	0.267	0.256	0.262	0.266	0.271	0.266	0.271	0.269	0.262	0.258	0.267	0.26	0.256	0.26	0.256	0.258	0.258	0.254	0.249	0.245	0.245	0.251	0.249	0.247	0.254	0.249	0.249	0.245	0.249	0.249	0.249	0.251	0.247	0.249	0.247	0.251	0.254	0.251	0.254	0.249	0.247	0.251	0.245	0.249	0.247	0.247
SO239_686_Ophiosphalma_glabrum_Species_3	0.257	0.262	0.259	0.266	0.255	0.262	0.266	0.27	0.266	0.271	0.268	0.262	0.257	0.266	0.259	0.255	0.259	0.255	0.258	0.258	0.253	0.249	0.245	0.245	0.251	0.249	0.247	0.253	0.249	0.249	0.245	0.249	0.249	0.249	0.251	0.247	0.249	0.247	0.251	0.254	0.251	0.253	0.249	0.247	0.251	0.245	0.249	0.247	0.247
SO239_2011_Ophiosphalma_glabrum_Species_3	0.26	0.264	0.262	0.268	0.257	0.264	0.268	0.273	0.268	0.273	0.27	0.264	0.259	0.268	0.262	0.257	0.262	0.257	0.26	0.26	0.26	0.255	0.251	0.251	0.257	0.255	0.253	0.26	0.255	0.255	0.251	0.255	0.255	0.255	0.257	0.253	0.255	0.253	0.257	0.26	0.257	0.26	0.255	0.253	0.257	0.251	0.255	0.253	0.253
2015_new_Ophiosphalma_glabrum_Species_3	0.256	0.26	0.258	0.264	0.253	0.26	0.264	0.269	0.264	0.269	0.266	0.26	0.256	0.264	0.258	0.253	0.258	0.253	0.256	0.256	0.254	0.249	0.245	0.245	0.251	0.249	0.247	0.254	0.249	0.249	0.245	0.249	0.249	0.249	0.251	0.247	0.249	0.247	0.251	0.254	0.251	0.254	0.249	0.247	0.251	0.245	0.249	0.247	0.247
KU519552.1_NHM_009_Ophiosphalma_glabrum_Species_3	0.253	0.256	0.256	0.26	0.249	0.256	0.26	0.265	0.26	0.265	0.262	0.256	0.253	0.258	0.253	0.251	0.256	0.249	0.258	0.258	0.258	0.256	0.252	0.253	0.258	0.256	0.253	0.26	0.256	0.256	0.253	0.256	0.253	0.256	0.256	0.253	0.256	0.253	0.258	0.261	0.258	0.258	0.256	0.253	0.258	0.251	0.256	0.256	0.253
KU519553.1_NHM_124_Ophiosphalma_glabrum_Species_3	0.263	0.265	0.263	0.27	0.258	0.265	0.27	0.275	0.27	0.271	0.273	0.265	0.263	0.268	0.263	0.26	0.265	0.258	0.267	0.267	0.258	0.255	0.25	0.253	0.258	0.255	0.255	0.26	0.255	0.255	0.253	0.255	0.255	0.255	0.255	0.253	0.255	0.253	0.255	0.26	0.255	0.258	0.255	0.255	0.258	0.25	0.255	0.25	0.253
KU519554.1_NHM_256_Ophiosphalma_glabrum_Species_3	0.256	0.258	0.258	0.262	0.251	0.258	0.262	0.267	0.262	0.267	0.265	0.258	0.255	0.26	0.256	0.253	0.258	0.251	0.26	0.26	0.255	0.253	0.249	0.251	0.255	0.253	0.251	0.258	0.253	0.253	0.251	0.253	0.253	0.253	0.253	0.251	0.253	0.251	0.255	0.258	0.255	0.255	0.253	0.251	0.255	0.249	0.253	0.251	0.251
KU519555.1_NHM_329_Ophiosphalma_glabrum_Species_3	0.261	0.265	0.263	0.27	0.259	0.265	0.27	0.274	0.27	0.274	0.272	0.265	0.261	0.27	0.263	0.259	0.263	0.259	0.262	0.262	0.257	0.252	0.248	0.248	0.255	0.252	0.25	0.257	0.252	0.252	0.248	0.252	0.252	0.252	0.255	0.25	0.255	0.25	0.254	0.257	0.252	0.257	0.252	0.25	0.255	0.248	0.252	0.248	0.25
KU519556.1_NHM_335_Ophiosphalma_glabrum_Species_3	0.259	0.264	0.262	0.268	0.257	0.264	0.268	0.273	0.268	0.273	0.27	0.264	0.259	0.268	0.262	0.257	0.262	0.257	0.26	0.26	0.258	0.253	0.249	0.249	0.255	0.253	0.251	0.258	0.253	0.253	0.249	0.253	0.253	0.253	0.255	0.251	0.253	0.251	0.255	0.258	0.255	0.257	0.253	0.251	0.255	0.249	0.253	0.251	0.251
KU519557.1_NHM_415_Ophiosphalma_glabrum_Species_3	0.26	0.264	0.262	0.264	0.257	0.264	0.264	0.273	0.268	0.273	0.266	0.259	0.259	0.268	0.262	0.257	0.262	0.257	0.26	0.26	0.26	0.255	0.251	0.251	0.257	0.255	0.253	0.26	0.255	0.255	0.251	0.255	0.255	0.255	0.257	0.253	0.255	0.253	0.257	0.26	0.257	0.26	0.255	0.253	0.257	0.251	0.255	0.253	0.253
KU519558.1_NHM_452_Ophiosphalma_glabrum_Species_3	0.26	0.264	0.262	0.264	0.257	0.264	0.264	0.273	0.268	0.273	0.266	0.259	0.259	0.268	0.262	0.257	0.262	0.257	0.26	0.26	0.26	0.255	0.251	0.251	0.257	0.255	0.253	0.26	0.255	0.255	0.251	0.255	0.255	0.255	0.257	0.253	0.255	0.253	0.257	0.26	0.257	0.26	0.255	0.253	0.257	0.251	0.255	0.253	0.253
AB1_EB3_9_5_Amphioplus_cf_daleus_Species_4	0.278	0.276	0.273	0.278	0.276	0.278	0.271	0.282	0.273	0.269	0.273	0.273	0.276	0.273	0.271	0.276	0.282	0.271	0.272	0.272	0.101	0.095	0.101	0.093	0.104	0.095	0.095	0.099	0.099	0.097	0.094	0.097	0.097	0.099	0.099	0.097	0.1	0.099	0.097	0.099	0.103	0.101	0.099	0.095	0.097	0.097	0.097	0.101	0.099
AB2_EB1_14_27_Amphioplus_cf_daleus_Species_4	0.302	0.295	0.295	0.299	0.297	0.299	0.295	0.304	0.295	0.29	0.295	0.295	0.297	0.295	0.292	0.297	0.304	0.297	0.29	0.29	0.12	0.114	0.12	0.112	0.124	0.114	0.118	0.116	0.114	0.116	0.113	0.116	0.116	0.116	0.118	0.112	0.118	0.118	0.116	0.118	0.122	0.12	0.114	0.114	0.116	0.116	0.116	0.118	0.118
SO242_1_252_Ophiuroidea_sp1_Species_5	0.284	0.28	0.275	0.284	0.279	0.284	0.277	0.271	0.282	0.279	0.282	0.279	0.277	0.282	0.284	0.277	0.282	0.284	0.283	0.283	0.264	0.26	0.256	0.258	0.262	0.26	0.26	0.262	0.26	0.26	0.264	0.26	0.26	0.26	0.26	0.262	0.256	0.258	0.258	0.26	0.264	0.264	0.26	0.258	0.26	0.256	0.26	0.264	0.262
SO242_1_181_D3_Amphilepis_sp_Species_5	0.284	0.28	0.275	0.284	0.279	0.284	0.277	0.271	0.282	0.279	0.282	0.279	0.277	0.284	0.284	0.277	0.282	0.284	0.283	0.283	0.258	0.253	0.249	0.251	0.255	0.253	0.253	0.256	0.253	0.253	0.258	0.253	0.253	0.253	0.253	0.255	0.249	0.251	0.251	0.254	0.258	0.258	0.253	0.251	0.253	0.249	0.253	0.258	0.255
MA13_18_8_Amphilepis_sp_Species_5	0.284	0.28	0.275	0.284	0.279	0.284	0.277	0.271	0.28	0.279	0.282	0.279	0.277	0.282	0.284	0.277	0.282	0.284	0.283	0.283	0.26	0.255	0.252	0.253	0.258	0.255	0.255	0.258	0.255	0.255	0.26	0.255	0.255	0.256	0.255	0.258	0.251	0.253	0.253	0.256	0.26	0.26	0.255	0.253	0.255	0.251	0.255	0.26	0.258
MA13_85_32_Amphilepis_sp_Species_5	0.289	0.284	0.279	0.284	0.284	0.289	0.282	0.275	0.286	0.284	0.286	0.286	0.282	0.286	0.289	0.282	0.286	0.289	0.288	0.288	0.26	0.255	0.252	0.253	0.258	0.255	0.255	0.258	0.26	0.255	0.26	0.255	0.255	0.256	0.255	0.258	0.256	0.253	0.253	0.256	0.26	0.26	0.255	0.253	0.255	0.251	0.255	0.26	0.258
MA13_90_09_Amphilepis_sp_Species_5	0.286	0.282	0.277	0.286	0.282	0.286	0.28	0.273	0.284	0.282	0.284	0.282	0.279	0.284	0.286	0.279	0.284	0.286	0.286	0.286	0.255	0.251	0.247	0.249	0.253	0.251	0.247	0.253	0.255	0.251	0.255	0.251	0.251	0.251	0.251	0.253	0.247	0.249	0.249	0.252	0.255	0.255	0.251	0.249	0.251	0.247	0.251	0.256	0.253
MA14_39_9_Amphilepis_sp_Species_5	0.289	0.284	0.279	0.289	0.284	0.289	0.282	0.275	0.286	0.284	0.286	0.286	0.282	0.286	0.289	0.282	0.286	0.289	0.288	0.288	0.26	0.255	0.252	0.253	0.258	0.255	0.255	0.258	0.26	0.255	0.26	0.255	0.255	0.256	0.255	0.258	0.256	0.253	0.253	0.256	0.26	0.26	0.255	0.253	0.255	0.251	0.255	0.26	0.258
SO242_2_222_F1_Ophiuroglypha_cf_polyacantha_Species_6	0.307	0.314	0.315	0.315	0.312	0.314	0.305	0.312	0.314	0.31	0.312	0.312	0.315	0.31	0.315	0.315	0.31	0.317	0.308	0.308	0.269	0.269	0.272	0.269	0.278	0.269	0.271	0.271	0.269	0.269	0.269	0.269	0.267	0.267	0.271	0.269	0.269	0.269	0.271	0.274	0.271	0.273	0.269	0.267	0.269	0.269	0.269	0.273	0.271
AB2_EB2_12_6_Ophiuroglypha_cf_polyacantha_Species_6	0.31	0.317	0.317	0.317	0.315	0.317	0.307	0.315	0.312	0.312	0.314	0.31	0.317	0.312	0.312	0.317	0.312	0.319	0.311	0.311	0.271	0.271	0.274	0.271	0.28	0.271	0.274	0.274	0.271	0.271	0.271	0.271	0.269	0.269	0.274	0.271	0.272	0.271	0.273	0.276	0.274	0.276	0.271	0.269	0.271	0.271	0.271	0.276	0.274
AB2_EB2_12_8_Ophiuroglypha_cf_polyacantha_Species_6	0.307	0.314	0.315	0.315	0.312	0.314	0.305	0.312	0.31	0.31	0.312	0.307	0.315	0.31	0.31	0.315	0.31	0.317	0.308	0.308	0.269	0.269	0.272	0.269	0.278	0.269	0.271	0.271	0.269	0.269	0.269	0.269	0.267	0.267	0.271	0.269	0.269	0.269	0.271	0.274	0.271	0.273	0.269	0.267	0.269	0.269	0.269	0.273	0.271
AB2_EB2_15_7_Ophiuroglypha_cf_polyacantha_Species_6	0.303	0.31	0.31	0.31	0.307	0.31	0.3	0.307	0.305	0.305	0.307	0.303	0.31	0.305	0.31	0.31	0.305	0.312	0.303	0.303	0.267	0.267	0.269	0.267	0.276	0.267	0.269	0.269	0.267	0.267	0.267	0.267	0.264	0.264	0.269	0.267	0.267	0.267	0.269	0.271	0.269	0.271	0.267	0.264	0.267	0.267	0.267	0.271	0.269
AB2_EB1_16_6_Ophiuroglypha_cf_polyacantha_Species_6	0.307	0.314	0.315	0.315	0.312	0.314	0.305	0.312	0.31	0.31	0.312	0.307	0.315	0.31	0.315	0.315	0.31	0.317	0.308	0.308	0.267	0.267	0.269	0.267	0.276	0.267	0.269	0.269	0.267	0.267	0.267	0.267	0.264	0.265	0.269	0.267	0.267	0.267	0.269	0.272	0.269	0.271	0.267	0.264	0.267	0.267	0.267	0.271	0.269
AB2_EB1_16_7_Ophiuroglypha_cf_polyacantha_Species_6	0.307	0.314	0.315	0.315	0.312	0.314	0.305	0.312	0.31	0.31	0.312	0.307	0.315	0.31	0.315	0.315	0.31	0.317	0.308	0.308	0.267	0.267	0.269	0.267	0.276	0.267	0.269	0.269	0.267	0.267	0.267	0.267	0.264	0.265	0.269	0.267	0.267	0.267	0.269	0.272	0.269	0.271	0.267	0.264	0.267	0.267	0.267	0.271	0.269
MA14_20_5_Ophiuroglypha_cf_polyacantha_Species_6	0.307	0.314	0.315	0.315	0.312	0.314	0.305	0.312	0.31	0.31	0.312	0.307	0.315	0.31	0.315	0.315	0.31	0.317	0.308	0.308	0.269	0.269	0.271	0.269	0.278	0.269	0.271	0.271	0.269	0.269	0.269	0.269	0.266	0.267	0.271	0.269	0.267	0.269	0.271	0.273	0.269	0.273	0.269	0.266	0.269	0.269	0.269	0.271	0.271
MA14_38_3_Ophiuroglypha_cf_polyacantha_Species_6	0.31	0.317	0.317	0.317	0.315	0.317	0.307	0.315	0.312	0.312	0.314	0.31	0.317	0.312	0.317	0.317	0.312	0.319	0.311	0.311	0.267	0.267	0.269	0.267	0.276	0.267	0.269	0.269	0.267	0.267	0.267	0.267	0.264	0.265	0.269	0.267	0.267	0.267	0.269	0.272	0.269	0.271	0.267	0.264	0.267	0.267	0.267	0.271	0.269
MA14_66_7_Ophiuroglypha_cf_polyacantha_Species_6	0.31	0.317	0.318	0.318	0.315	0.317	0.308	0.315	0.313	0.313	0.315	0.31	0.318	0.313	0.318	0.318	0.313	0.32	0.311	0.311	0.269	0.269	0.27	0.27	0.279	0.269	0.272	0.272	0.269	0.269	0.27	0.269	0.267	0.267	0.272	0.269	0.27	0.269	0.272	0.272	0.267	0.274	0.269	0.267	0.269	0.27	0.269	0.269	0.272
SO239_20_19_Ophiuroglypha_cf_polyacantha_Species_6	0.305	0.312	0.312	0.312	0.31	0.312	0.302	0.31	0.312	0.307	0.31	0.31	0.312	0.307	0.312	0.312	0.307	0.314	0.306	0.306	0.267	0.267	0.269	0.267	0.276	0.267	0.269	0.269	0.267	0.267	0.267	0.267	0.264	0.265	0.269	0.267	0.267	0.267	0.269	0.272	0.269	0.271	0.267	0.264	0.267	0.267	0.267	0.271	0.269
SO242_2_176_F8_Ophiura_sp_Species_7	0.271	0.282	0.284	0.286	0.282	0.282	0.273	0.289	0.275	0.28	0.282	0.277	0.279	0.277	0.28	0.279	0.277	0.286	0.281	0.281	0.245	0.245	0.248	0.243	0.249	0.245	0.247	0.247	0.241	0.245	0.247	0.245	0.243	0.243	0.247	0.247	0.256	0.245	0.247	0.248	0.243	0.249	0.245	0.243	0.245	0.241	0.245	0.249	0.247
SO239_59_10_Ophiopyrgidae_sp_Species_8	0.259	0.257	0.264	0.264	0.264	0.264	0.261	0.264	0.253	0.255	0.266	0.261	0.257	0.259	0.257	0.257	0.257	0.257	0.258	0.258	0.275	0.28	0.278	0.273	0.277	0.28	0.277	0.277	0.271	0.28	0.277	0.28	0.28	0.28	0.28	0.282	0.277	0.28	0.282	0.285	0.28	0.284	0.28	0.277	0.275	0.275	0.28	0.282	0.282
2059_new_Ophiuroglypha_sp_Species_9	0.232	0.238	0.238	0.243	0.238	0.24	0.24	0.238	0.238	0.234	0.238	0.24	0.236	0.234	0.236	0.236	0.238	0.245	0.233	0.233	0.275	0.275	0.273	0.268	0.273	0.275	0.273	0.273	0.275	0.275	0.275	0.275	0.275	0.277	0.277	0.277	0.279	0.275	0.273	0.278	0.277	0.279	0.277	0.277	0.275	0.275	0.275	0.275	0.277
2063_new_Ophiuroglypha_sp_Species_9	0.23	0.234	0.234	0.236	0.234	0.234	0.236	0.232	0.234	0.23	0.234	0.236	0.234	0.232	0.23	0.234	0.234	0.241	0.232	0.232	0.276	0.279	0.277	0.274	0.276	0.279	0.276	0.276	0.279	0.279	0.281	0.279	0.279	0.281	0.279	0.281	0.283	0.279	0.276	0.282	0.281	0.281	0.281	0.281	0.274	0.279	0.279	0.279	0.279
2074_new_Ophiuroglypha_sp_Species_9	0.236	0.243	0.243	0.247	0.243	0.245	0.245	0.247	0.243	0.238	0.243	0.243	0.24	0.238	0.241	0.24	0.243	0.249	0.238	0.238	0.286	0.286	0.285	0.28	0.284	0.286	0.284	0.284	0.286	0.286	0.286	0.286	0.286	0.289	0.289	0.289	0.286	0.286	0.284	0.289	0.289	0.291	0.289	0.289	0.282	0.286	0.286	0.286	0.289
2078_new_Ophiuroglypha_sp_Species_9	0.238	0.245	0.245	0.249	0.245	0.247	0.247	0.245	0.245	0.24	0.245	0.247	0.243	0.24	0.243	0.243	0.245	0.251	0.235	0.235	0.282	0.282	0.28	0.275	0.279	0.282	0.279	0.277	0.277	0.282	0.282	0.282	0.282	0.282	0.284	0.284	0.284	0.282	0.279	0.284	0.284	0.286	0.279	0.284	0.277	0.282	0.282	0.279	0.284
SO239_2080_Ophiuroglypha_sp_Species_9	0.234	0.24	0.24	0.245	0.24	0.243	0.243	0.241	0.241	0.236	0.24	0.243	0.238	0.236	0.238	0.238	0.241	0.247	0.235	0.235	0.279	0.279	0.278	0.273	0.277	0.279	0.277	0.277	0.279	0.279	0.279	0.279	0.279	0.282	0.282	0.282	0.284	0.279	0.277	0.282	0.282	0.284	0.282	0.282	0.275	0.279	0.279	0.28	0.282
SO239_2082_Ophiuroglypha_sp_Species_9	0.23	0.236	0.236	0.241	0.236	0.238	0.238	0.241	0.236	0.232	0.236	0.238	0.234	0.232	0.234	0.234	0.236	0.243	0.231	0.231	0.277	0.277	0.276	0.271	0.275	0.277	0.275	0.275	0.277	0.277	0.277	0.277	0.277	0.279	0.28	0.28	0.282	0.277	0.275	0.28	0.28	0.282	0.28	0.28	0.273	0.277	0.277	0.277	0.28
SO239_2084_Ophiuroglypha_sp_Species_9	0.237	0.239	0.243	0.241	0.239	0.241	0.241	0.241	0.239	0.237	0.239	0.241	0.237	0.234	0.237	0.237	0.239	0.245	0.234	0.234	0.278	0.278	0.276	0.271	0.273	0.278	0.276	0.275	0.278	0.278	0.278	0.278	0.278	0.28	0.28	0.28	0.287	0.278	0.28	0.28	0.278	0.282	0.28	0.28	0.273	0.278	0.278	0.276	0.28
SO239_2085_Ophiuroglypha_sp_Species_9	0.23	0.236	0.236	0.24	0.236	0.238	0.238	0.241	0.236	0.232	0.236	0.238	0.234	0.232	0.234	0.234	0.236	0.243	0.231	0.231	0.279	0.279	0.278	0.273	0.277	0.279	0.277	0.277	0.279	0.279	0.279	0.279	0.279	0.282	0.282	0.282	0.284	0.279	0.277	0.282	0.282	0.284	0.282	0.282	0.279	0.279	0.279	0.28	0.282
SO239_2086_Ophiuroglypha_sp_Species_9	0.228	0.234	0.234	0.238	0.234	0.236	0.236	0.234	0.234	0.23	0.234	0.236	0.232	0.23	0.232	0.232	0.234	0.24	0.231	0.231	0.28	0.28	0.278	0.273	0.277	0.28	0.277	0.277	0.28	0.28	0.279	0.28	0.28	0.282	0.282	0.282	0.284	0.28	0.277	0.282	0.282	0.284	0.282	0.282	0.275	0.279	0.28	0.28	0.282
SO239_2087_Ophiuroglypha_sp_Species_9	0.234	0.24	0.238	0.245	0.236	0.243	0.243	0.241	0.241	0.236	0.24	0.243	0.238	0.236	0.238	0.238	0.241	0.243	0.235	0.235	0.284	0.284	0.282	0.277	0.282	0.284	0.282	0.282	0.284	0.284	0.284	0.284	0.284	0.286	0.286	0.286	0.288	0.284	0.282	0.287	0.286	0.288	0.286	0.286	0.279	0.284	0.284	0.284	0.286
2088_new_Ophiuroglypha_Species_9	0.234	0.24	0.24	0.245	0.24	0.242	0.242	0.241	0.24	0.236	0.24	0.242	0.238	0.236	0.238	0.238	0.243	0.247	0.235	0.235	0.279	0.279	0.278	0.273	0.277	0.279	0.277	0.277	0.279	0.279	0.279	0.279	0.279	0.282	0.282	0.282	0.284	0.279	0.277	0.282	0.282	0.284	0.282	0.282	0.275	0.279	0.279	0.279	0.282
SO239_2091_Ophiuroglypha_sp_Species_9	0.238	0.245	0.245	0.249	0.245	0.247	0.247	0.245	0.245	0.241	0.245	0.247	0.243	0.24	0.243	0.243	0.245	0.251	0.235	0.235	0.277	0.277	0.275	0.271	0.275	0.277	0.279	0.275	0.277	0.277	0.277	0.277	0.277	0.279	0.279	0.279	0.282	0.277	0.275	0.28	0.279	0.282	0.279	0.279	0.273	0.277	0.277	0.277	0.279
SO239_2093_Ophiuroglypha_sp_Species_9	0.23	0.236	0.234	0.24	0.232	0.238	0.238	0.236	0.236	0.232	0.236	0.238	0.234	0.234	0.234	0.234	0.236	0.238	0.231	0.231	0.277	0.277	0.273	0.271	0.275	0.277	0.275	0.275	0.277	0.277	0.277	0.277	0.277	0.279	0.279	0.279	0.282	0.277	0.275	0.278	0.275	0.282	0.279	0.279	0.277	0.277	0.277	0.273	0.279
2092_new_Ophiuroglypha_sp_Species_9	0.234	0.238	0.238	0.245	0.241	0.243	0.243	0.241	0.238	0.236	0.24	0.243	0.236	0.236	0.236	0.236	0.241	0.247	0.235	0.235	0.277	0.277	0.276	0.271	0.275	0.277	0.275	0.275	0.277	0.277	0.277	0.277	0.277	0.279	0.28	0.28	0.282	0.277	0.275	0.28	0.28	0.282	0.28	0.28	0.273	0.277	0.277	0.277	0.28
SO239_396_Anophiura_sp_Species_10	0.246	0.25	0.254	0.252	0.252	0.252	0.243	0.248	0.248	0.252	0.25	0.248	0.248	0.248	0.254	0.248	0.248	0.252	0.247	0.247	0.254	0.249	0.248	0.251	0.251	0.251	0.247	0.249	0.256	0.249	0.254	0.249	0.249	0.249	0.251	0.251	0.251	0.249	0.251	0.252	0.251	0.254	0.249	0.249	0.249	0.249	0.249	0.247	0.251
SO239_395_Ophiuroglypha_sp_Species_11	0.242	0.242	0.24	0.251	0.242	0.249	0.253	0.253	0.236	0.238	0.245	0.247	0.24	0.238	0.249	0.24	0.245	0.242	0.244	0.244	0.249	0.249	0.247	0.246	0.251	0.249	0.249	0.246	0.251	0.249	0.249	0.249	0.249	0.246	0.251	0.251	0.246	0.249	0.246	0.251	0.249	0.253	0.249	0.251	0.249	0.244	0.249	0.246	0.251
SO239_2113_Asteroschema_sp_Species_12	0.264	0.277	0.268	0.277	0.27	0.275	0.275	0.266	0.273	0.268	0.275	0.277	0.27	0.277	0.273	0.27	0.268	0.273	0.276	0.276	0.251	0.255	0.253	0.257	0.255	0.253	0.255	0.253	0.251	0.255	0.255	0.255	0.257	0.255	0.257	0.257	0.244	0.255	0.251	0.258	0.255	0.259	0.255	0.257	0.257	0.251	0.255	0.257	0.257
KU519567.1_Perlophiura_profundissima_Species_13	0.259	0.255	0.249	0.257	0.253	0.255	0.257	0.255	0.257	0.264	0.261	0.251	0.253	0.266	0.251	0.251	0.259	0.253	0.26	0.26	0.266	0.261	0.26	0.261	0.261	0.264	0.261	0.259	0.264	0.261	0.257	0.261	0.264	0.259	0.264	0.264	0.255	0.261	0.259	0.264	0.264	0.266	0.261	0.259	0.264	0.262	0.261	0.264	0.264
SO242_1_387_A7_Perlophiura_profundissima_Species_13	0.264	0.259	0.253	0.261	0.257	0.259	0.261	0.259	0.261	0.264	0.266	0.255	0.257	0.27	0.255	0.255	0.264	0.257	0.264	0.264	0.264	0.259	0.258	0.259	0.259	0.261	0.259	0.257	0.261	0.259	0.255	0.259	0.261	0.257	0.261	0.261	0.253	0.259	0.257	0.266	0.261	0.264	0.259	0.257	0.261	0.259	0.259	0.261	0.261
SO239_59_18_Ophiuroglypha_sp_Species_14	0.26	0.264	0.264	0.266	0.262	0.268	0.257	0.262	0.259	0.262	0.262	0.262	0.262	0.262	0.264	0.262	0.262	0.264	0.262	0.262	0.228	0.228	0.226	0.222	0.232	0.228	0.226	0.232	0.228	0.228	0.224	0.228	0.23	0.228	0.23	0.23	0.228	0.228	0.23	0.232	0.228	0.23	0.228	0.226	0.228	0.224	0.228	0.234	0.23
SO239_197_2_Ophiophyllum_sp_Species_15	0.243	0.243	0.247	0.251	0.241	0.247	0.247	0.249	0.237	0.243	0.243	0.243	0.243	0.245	0.245	0.243	0.251	0.245	0.238	0.238	0.234	0.234	0.233	0.241	0.236	0.236	0.234	0.236	0.236	0.234	0.234	0.234	0.236	0.236	0.236	0.236	0.234	0.234	0.236	0.241	0.236	0.238	0.236	0.232	0.238	0.23	0.234	0.241	0.236
SO239_139_1_Ophiophyllum_sp_Species_15	0.244	0.244	0.249	0.253	0.242	0.249	0.249	0.251	0.238	0.245	0.245	0.245	0.245	0.247	0.247	0.245	0.253	0.247	0.238	0.238	0.234	0.234	0.232	0.24	0.236	0.236	0.234	0.236	0.236	0.234	0.234	0.234	0.236	0.236	0.236	0.236	0.234	0.234	0.238	0.241	0.236	0.238	0.236	0.232	0.238	0.23	0.234	0.24	0.236
AB1_EB5_10_11_Amphiophiura_bullata_Species_16	0.246	0.251	0.253	0.251	0.251	0.255	0.253	0.251	0.244	0.255	0.251	0.255	0.251	0.255	0.255	0.251	0.249	0.251	0.26	0.26	0.247	0.251	0.249	0.253	0.247	0.251	0.251	0.249	0.249	0.251	0.251	0.251	0.249	0.253	0.253	0.253	0.26	0.251	0.253	0.252	0.251	0.255	0.253	0.249	0.255	0.247	0.251	0.251	0.253
AB1_EB4_11_9_Amphiophiura_bullata_Species_16	0.249	0.253	0.255	0.253	0.253	0.257	0.255	0.253	0.247	0.257	0.253	0.257	0.253	0.257	0.257	0.253	0.251	0.253	0.262	0.262	0.247	0.251	0.249	0.253	0.247	0.251	0.251	0.249	0.249	0.251	0.251	0.251	0.249	0.253	0.253	0.253	0.26	0.251	0.253	0.252	0.251	0.255	0.253	0.249	0.255	0.247	0.251	0.251	0.253
MA13_90_16_Amphiophiura_bullata_Species_16	0.253	0.253	0.256	0.253	0.253	0.258	0.256	0.253	0.247	0.258	0.253	0.258	0.253	0.258	0.258	0.253	0.251	0.253	0.258	0.258	0.245	0.245	0.243	0.247	0.241	0.245	0.245	0.243	0.243	0.245	0.245	0.245	0.243	0.247	0.247	0.247	0.249	0.245	0.247	0.246	0.245	0.249	0.247	0.243	0.249	0.241	0.245	0.245	0.247
NODBIO_80_1_Amphiophiura_bullata_Species_16	0.245	0.249	0.251	0.249	0.249	0.253	0.251	0.249	0.243	0.253	0.249	0.253	0.249	0.253	0.253	0.249	0.247	0.249	0.258	0.258	0.245	0.249	0.248	0.252	0.245	0.249	0.249	0.247	0.247	0.249	0.249	0.249	0.247	0.251	0.252	0.252	0.258	0.249	0.252	0.25	0.249	0.254	0.252	0.247	0.254	0.245	0.249	0.249	0.252
SO239_118_5_Amphiophiura_bullata_Species_16	0.253	0.257	0.259	0.257	0.257	0.262	0.259	0.257	0.251	0.262	0.257	0.262	0.257	0.261	0.262	0.257	0.255	0.257	0.267	0.267	0.249	0.253	0.251	0.255	0.249	0.253	0.253	0.251	0.251	0.253	0.253	0.253	0.251	0.255	0.255	0.255	0.262	0.253	0.255	0.254	0.253	0.257	0.255	0.251	0.258	0.249	0.253	0.253	0.255
SO239_118_12_Amphiophiura_bullata_Species_16	0.249	0.253	0.255	0.253	0.253	0.257	0.255	0.253	0.247	0.257	0.253	0.257	0.253	0.257	0.257	0.253	0.251	0.253	0.262	0.262	0.247	0.251	0.249	0.253	0.247	0.251	0.251	0.249	0.249	0.251	0.251	0.251	0.249	0.253	0.253	0.253	0.26	0.251	0.253	0.252	0.251	0.255	0.253	0.249	0.255	0.247	0.251	0.251	0.253
SO239_118_13_Amphiophiura_bullata_Species_16	0.244	0.249	0.251	0.249	0.249	0.253	0.251	0.249	0.242	0.253	0.249	0.253	0.249	0.253	0.253	0.249	0.247	0.249	0.258	0.258	0.245	0.249	0.247	0.251	0.245	0.249	0.249	0.247	0.247	0.249	0.249	0.249	0.247	0.251	0.251	0.251	0.258	0.249	0.251	0.249	0.249	0.253	0.251	0.247	0.253	0.245	0.249	0.249	0.251
SO239_133_3_Amphiophiura_bullata_Species_16	0.24	0.244	0.247	0.244	0.244	0.249	0.247	0.244	0.238	0.249	0.244	0.249	0.244	0.249	0.249	0.244	0.242	0.244	0.255	0.255	0.249	0.253	0.251	0.251	0.249	0.253	0.253	0.251	0.251	0.253	0.249	0.253	0.251	0.255	0.255	0.255	0.262	0.253	0.255	0.254	0.253	0.258	0.255	0.251	0.258	0.249	0.253	0.253	0.255
SO239_133_5_Amphiophiura_bullata_Species_16	0.249	0.253	0.255	0.253	0.253	0.257	0.251	0.253	0.247	0.257	0.253	0.253	0.253	0.257	0.257	0.253	0.251	0.253	0.262	0.262	0.249	0.249	0.247	0.251	0.245	0.249	0.249	0.251	0.247	0.249	0.249	0.249	0.247	0.251	0.251	0.251	0.258	0.249	0.251	0.249	0.249	0.253	0.251	0.247	0.253	0.245	0.249	0.249	0.251
SO239_133_9_Amphiophiura_bullata_Species_16	0.246	0.251	0.253	0.251	0.251	0.255	0.253	0.251	0.244	0.255	0.251	0.255	0.251	0.255	0.255	0.251	0.249	0.251	0.26	0.26	0.249	0.253	0.252	0.256	0.249	0.253	0.253	0.251	0.251	0.253	0.253	0.253	0.251	0.255	0.255	0.255	0.262	0.253	0.256	0.254	0.253	0.258	0.255	0.251	0.258	0.249	0.253	0.253	0.255
2018_new_Amphiophiura_bullata_Species_16	0.242	0.246	0.249	0.247	0.247	0.251	0.249	0.247	0.24	0.251	0.247	0.251	0.247	0.251	0.251	0.247	0.244	0.246	0.255	0.255	0.249	0.253	0.252	0.256	0.249	0.253	0.253	0.251	0.251	0.253	0.253	0.253	0.251	0.255	0.255	0.255	0.258	0.253	0.256	0.254	0.253	0.258	0.255	0.251	0.258	0.249	0.253	0.253	0.255
SO239_197_6_Ophioscolecidae_sp_Species_17	0.249	0.244	0.251	0.249	0.244	0.251	0.251	0.242	0.24	0.249	0.244	0.242	0.244	0.244	0.24	0.244	0.253	0.238	0.251	0.251	0.259	0.266	0.262	0.261	0.272	0.261	0.261	0.259	0.257	0.264	0.259	0.264	0.264	0.264	0.266	0.266	0.262	0.264	0.266	0.266	0.27	0.268	0.264	0.266	0.266	0.259	0.264	0.268	0.266
SO239_197_5_Ophioscolecidae_sp_Species_17	0.249	0.244	0.251	0.249	0.244	0.251	0.251	0.242	0.24	0.249	0.244	0.242	0.244	0.244	0.24	0.244	0.253	0.238	0.251	0.251	0.259	0.266	0.262	0.261	0.272	0.261	0.261	0.259	0.257	0.264	0.259	0.264	0.264	0.264	0.266	0.266	0.262	0.264	0.266	0.266	0.27	0.268	0.264	0.266	0.266	0.259	0.264	0.268	0.266
SO239_197_4_Ophioscolecidae_sp_Species_17	0.249	0.244	0.251	0.249	0.244	0.251	0.251	0.242	0.24	0.249	0.244	0.242	0.244	0.244	0.24	0.244	0.253	0.238	0.251	0.251	0.259	0.266	0.262	0.261	0.272	0.261	0.261	0.259	0.257	0.264	0.259	0.264	0.264	0.264	0.266	0.266	0.262	0.264	0.266	0.266	0.27	0.268	0.264	0.266	0.266	0.259	0.264	0.268	0.266
SO239_24_21_Ophioscolecidae_sp_Species_18	0.264	0.249	0.253	0.255	0.251	0.259	0.253	0.264	0.244	0.249	0.249	0.249	0.255	0.251	0.251	0.253	0.259	0.253	0.251	0.251	0.3	0.297	0.293	0.293	0.3	0.295	0.295	0.293	0.29	0.295	0.29	0.295	0.295	0.293	0.297	0.297	0.288	0.295	0.293	0.3	0.3	0.3	0.295	0.297	0.295	0.293	0.295	0.297	0.297
SO242_1_347_Ophioscolecidae_sp_Species_18	0.266	0.251	0.255	0.257	0.253	0.261	0.255	0.266	0.246	0.251	0.251	0.251	0.257	0.253	0.253	0.255	0.261	0.255	0.253	0.253	0.295	0.293	0.289	0.288	0.295	0.29	0.29	0.288	0.286	0.29	0.286	0.29	0.29	0.288	0.293	0.293	0.284	0.29	0.288	0.295	0.295	0.295	0.29	0.293	0.29	0.288	0.29	0.293	0.293
MA13_18_7_Ophioscolecidae_sp_Species_18	0.257	0.242	0.246	0.249	0.246	0.255	0.246	0.257	0.238	0.244	0.242	0.242	0.249	0.244	0.244	0.246	0.253	0.246	0.244	0.244	0.304	0.302	0.298	0.297	0.304	0.3	0.3	0.297	0.295	0.3	0.295	0.3	0.3	0.297	0.302	0.302	0.293	0.3	0.297	0.302	0.304	0.304	0.3	0.302	0.3	0.297	0.3	0.302	0.302
AB2_EB2_12_10_Ophioscolecidae_sp_Species_19	0.288	0.288	0.297	0.288	0.288	0.292	0.283	0.288	0.29	0.281	0.285	0.288	0.29	0.281	0.29	0.292	0.29	0.285	0.287	0.287	0.293	0.288	0.286	0.29	0.295	0.288	0.293	0.293	0.288	0.29	0.288	0.29	0.29	0.293	0.293	0.288	0.292	0.288	0.29	0.293	0.295	0.293	0.293	0.288	0.295	0.288	0.29	0.288	0.293
SO239_192_2_Ophioscolecidae_sp_Species_20	0.264	0.259	0.251	0.257	0.261	0.264	0.268	0.264	0.257	0.257	0.261	0.266	0.257	0.257	0.257	0.257	0.257	0.257	0.251	0.251	0.286	0.288	0.289	0.289	0.288	0.286	0.286	0.282	0.288	0.286	0.291	0.286	0.284	0.286	0.284	0.288	0.288	0.286	0.282	0.289	0.293	0.286	0.286	0.288	0.291	0.282	0.286	0.291	0.288
SO239_192_7_Ophioscolecidae_sp_Species_20	0.264	0.264	0.255	0.261	0.266	0.268	0.268	0.268	0.261	0.261	0.266	0.27	0.261	0.261	0.261	0.261	0.257	0.261	0.255	0.255	0.284	0.286	0.287	0.286	0.286	0.284	0.284	0.279	0.286	0.284	0.288	0.284	0.282	0.284	0.282	0.286	0.286	0.284	0.279	0.287	0.291	0.284	0.284	0.286	0.289	0.279	0.284	0.288	0.286
SO239_158_3_Ophioscolecidae_Species_20	0.264	0.264	0.255	0.261	0.266	0.268	0.268	0.268	0.261	0.261	0.266	0.27	0.261	0.261	0.261	0.261	0.257	0.261	0.255	0.255	0.284	0.286	0.287	0.286	0.286	0.284	0.284	0.279	0.286	0.284	0.288	0.284	0.282	0.284	0.282	0.286	0.286	0.284	0.279	0.287	0.291	0.284	0.284	0.286	0.289	0.279	0.284	0.288	0.286
SO239_192_8_Ophioscolecidae_sp_Species_20	0.264	0.264	0.255	0.261	0.266	0.268	0.268	0.268	0.261	0.261	0.266	0.27	0.261	0.261	0.261	0.261	0.257	0.261	0.255	0.255	0.284	0.286	0.287	0.286	0.286	0.284	0.284	0.279	0.286	0.284	0.288	0.284	0.282	0.284	0.282	0.286	0.286	0.284	0.279	0.287	0.291	0.284	0.284	0.286	0.289	0.279	0.284	0.288	0.286
SO242_1_116_A6_Ophiotoma_sp_Species_21	0.266	0.275	0.264	0.278	0.269	0.273	0.269	0.271	0.271	0.266	0.278	0.271	0.266	0.277	0.264	0.266	0.266	0.271	0.27	0.27	0.262	0.259	0.262	0.257	0.264	0.259	0.257	0.259	0.255	0.259	0.259	0.259	0.259	0.257	0.257	0.262	0.255	0.259	0.257	0.264	0.264	0.259	0.259	0.259	0.259	0.255	0.259	0.262	0.262
53_159_3_Ophiotoma_sp_Species_21	0.266	0.275	0.264	0.278	0.269	0.273	0.269	0.271	0.271	0.267	0.278	0.271	0.266	0.278	0.264	0.266	0.266	0.271	0.27	0.27	0.257	0.255	0.258	0.253	0.259	0.255	0.253	0.259	0.257	0.255	0.255	0.255	0.255	0.257	0.253	0.257	0.255	0.255	0.253	0.26	0.259	0.255	0.257	0.255	0.255	0.251	0.255	0.257	0.257
SO239_20_12_Ophiotoma_sp_Species_21	0.266	0.275	0.264	0.278	0.269	0.273	0.269	0.271	0.271	0.266	0.278	0.271	0.266	0.277	0.264	0.266	0.266	0.271	0.27	0.27	0.262	0.259	0.262	0.257	0.264	0.259	0.257	0.259	0.255	0.259	0.259	0.259	0.259	0.257	0.257	0.262	0.255	0.259	0.257	0.264	0.264	0.259	0.259	0.259	0.259	0.255	0.259	0.262	0.262
AB1_EB5_10_10_Ophioleucidae_sp_Species_22	0.289	0.287	0.289	0.289	0.287	0.289	0.282	0.287	0.282	0.28	0.289	0.284	0.282	0.284	0.287	0.282	0.28	0.285	0.284	0.284	0.286	0.286	0.289	0.279	0.286	0.286	0.288	0.284	0.281	0.286	0.281	0.286	0.286	0.284	0.288	0.288	0.29	0.286	0.29	0.291	0.293	0.286	0.286	0.286	0.286	0.281	0.286	0.291	0.288
NODBIO_33_22_Ophioleucidae_sp_Species_22	0.291	0.289	0.291	0.291	0.289	0.291	0.284	0.289	0.284	0.282	0.291	0.287	0.284	0.287	0.289	0.284	0.282	0.287	0.286	0.286	0.286	0.286	0.289	0.279	0.286	0.286	0.288	0.284	0.281	0.286	0.281	0.286	0.286	0.284	0.288	0.288	0.291	0.286	0.29	0.291	0.293	0.286	0.286	0.286	0.286	0.281	0.286	0.291	0.288
SO239_59_1_Ophioleucidae_sp_Species_22	0.289	0.287	0.289	0.289	0.287	0.289	0.282	0.287	0.282	0.28	0.289	0.284	0.282	0.285	0.287	0.282	0.28	0.285	0.284	0.284	0.286	0.286	0.289	0.279	0.286	0.286	0.288	0.284	0.281	0.286	0.281	0.286	0.286	0.284	0.288	0.288	0.291	0.286	0.29	0.291	0.293	0.286	0.286	0.286	0.286	0.281	0.286	0.291	0.288
SO239_24_17_Ophioleucidae_sp_Species_22	0.289	0.287	0.289	0.29	0.287	0.289	0.282	0.287	0.282	0.28	0.289	0.285	0.283	0.285	0.287	0.283	0.283	0.285	0.284	0.284	0.286	0.286	0.289	0.28	0.284	0.286	0.289	0.284	0.282	0.286	0.282	0.286	0.286	0.284	0.289	0.289	0.291	0.286	0.291	0.291	0.291	0.287	0.286	0.286	0.286	0.282	0.286	0.289	0.289
SO239_397_Ophioleuce_regulare_Species_23	0.267	0.258	0.267	0.263	0.258	0.265	0.265	0.258	0.26	0.265	0.267	0.265	0.26	0.267	0.262	0.26	0.26	0.26	0.247	0.247	0.293	0.298	0.294	0.295	0.295	0.293	0.295	0.291	0.291	0.295	0.295	0.295	0.295	0.295	0.293	0.298	0.307	0.295	0.3	0.298	0.3	0.295	0.295	0.295	0.291	0.291	0.295	0.295	0.298
AB2_EB1_13_8_Ophiocymbium_sp_Species_24	0.222	0.216	0.216	0.222	0.214	0.218	0.22	0.212	0.216	0.214	0.216	0.216	0.218	0.22	0.216	0.216	0.22	0.218	0.218	0.218	0.321	0.325	0.326	0.321	0.325	0.323	0.321	0.316	0.325	0.323	0.323	0.323	0.323	0.321	0.323	0.325	0.313	0.323	0.318	0.324	0.325	0.328	0.323	0.323	0.323	0.32	0.323	0.323	0.325
AB2_EB1_13_30_Ophiocymbium_sp_Species_24	0.22	0.214	0.214	0.22	0.212	0.216	0.218	0.21	0.214	0.212	0.214	0.214	0.216	0.218	0.214	0.214	0.218	0.216	0.217	0.217	0.319	0.324	0.324	0.319	0.324	0.321	0.319	0.314	0.324	0.321	0.321	0.321	0.321	0.319	0.321	0.324	0.312	0.321	0.316	0.322	0.324	0.326	0.321	0.321	0.321	0.319	0.321	0.321	0.324
AB2_EB1_13_40_Ophiocymbium_sp_Species_24	0.222	0.216	0.216	0.222	0.214	0.218	0.22	0.212	0.216	0.214	0.216	0.216	0.218	0.22	0.216	0.216	0.22	0.218	0.218	0.218	0.321	0.325	0.326	0.321	0.325	0.323	0.321	0.316	0.325	0.323	0.323	0.323	0.323	0.321	0.323	0.325	0.313	0.323	0.318	0.324	0.325	0.328	0.323	0.323	0.323	0.32	0.323	0.323	0.325
AB2_EB2_12_9_Ophiocymbium_sp_Species_24	0.222	0.216	0.216	0.222	0.214	0.218	0.22	0.212	0.216	0.214	0.216	0.216	0.218	0.22	0.216	0.216	0.22	0.218	0.218	0.218	0.321	0.325	0.326	0.321	0.325	0.323	0.321	0.316	0.325	0.323	0.323	0.323	0.323	0.321	0.323	0.325	0.313	0.323	0.318	0.324	0.325	0.328	0.323	0.323	0.323	0.32	0.323	0.323	0.325
AB2_EB2_12_12_Ophiocymbium_sp_Species_24	0.222	0.216	0.216	0.222	0.214	0.218	0.22	0.212	0.216	0.214	0.216	0.216	0.218	0.22	0.216	0.216	0.22	0.218	0.218	0.218	0.321	0.325	0.326	0.321	0.325	0.323	0.321	0.316	0.325	0.323	0.323	0.323	0.323	0.321	0.323	0.325	0.313	0.323	0.318	0.324	0.325	0.328	0.323	0.323	0.323	0.32	0.323	0.323	0.325
SO239_192_4_Ophiocymbium_sp_Species_24	0.224	0.216	0.218	0.218	0.214	0.214	0.22	0.212	0.212	0.21	0.212	0.216	0.216	0.216	0.212	0.218	0.218	0.218	0.214	0.214	0.325	0.33	0.331	0.325	0.33	0.328	0.325	0.321	0.33	0.328	0.328	0.328	0.328	0.325	0.328	0.33	0.318	0.328	0.323	0.328	0.33	0.333	0.328	0.328	0.328	0.325	0.328	0.328	0.33
SO239_210_1_Ophiocymbium_sp_Species_24	0.224	0.218	0.218	0.22	0.216	0.216	0.222	0.21	0.214	0.212	0.214	0.218	0.216	0.218	0.214	0.218	0.218	0.22	0.216	0.216	0.325	0.33	0.331	0.326	0.33	0.328	0.325	0.321	0.33	0.328	0.328	0.328	0.328	0.326	0.328	0.33	0.318	0.328	0.323	0.329	0.33	0.333	0.328	0.328	0.328	0.325	0.328	0.328	0.33
AB1_EB4_11_30_Ophiocymbium_sp_Species_25	0.29	0.29	0.288	0.292	0.285	0.29	0.292	0.288	0.286	0.29	0.293	0.295	0.285	0.295	0.292	0.283	0.283	0.292	0.29	0.29	0.317	0.321	0.319	0.316	0.317	0.321	0.319	0.312	0.321	0.319	0.319	0.319	0.321	0.317	0.321	0.321	0.328	0.317	0.319	0.326	0.317	0.322	0.319	0.317	0.314	0.314	0.319	0.324	0.321
KU519564.1_NHM_072_Ophiocymbium_Species_25	0.282	0.285	0.285	0.282	0.285	0.285	0.29	0.279	0.28	0.282	0.288	0.29	0.282	0.29	0.287	0.279	0.28	0.29	0.287	0.287	0.324	0.329	0.327	0.326	0.324	0.329	0.327	0.318	0.329	0.327	0.329	0.327	0.324	0.324	0.327	0.324	0.335	0.324	0.329	0.335	0.324	0.327	0.327	0.324	0.321	0.321	0.327	0.329	0.327
AB1_EB3_9_1_Ophiomyces_sp_Species_26	0.232	0.23	0.23	0.226	0.224	0.228	0.222	0.221	0.23	0.232	0.228	0.219	0.23	0.228	0.232	0.228	0.23	0.226	0.231	0.231	0.311	0.311	0.307	0.301	0.306	0.308	0.308	0.311	0.311	0.308	0.304	0.308	0.306	0.308	0.311	0.306	0.309	0.308	0.308	0.314	0.315	0.313	0.308	0.308	0.304	0.311	0.308	0.308	0.311
AB1_EB5_10_1_Ophiomyces_sp_Species_26	0.234	0.232	0.234	0.228	0.23	0.23	0.224	0.224	0.232	0.234	0.23	0.222	0.232	0.23	0.234	0.23	0.232	0.232	0.231	0.231	0.311	0.311	0.307	0.301	0.306	0.308	0.308	0.311	0.311	0.308	0.304	0.308	0.306	0.308	0.311	0.306	0.309	0.308	0.308	0.314	0.315	0.313	0.308	0.308	0.304	0.311	0.308	0.308	0.311
AB1_EB5_10_3_Ophiomyces_sp_Species_26	0.236	0.234	0.234	0.23	0.228	0.232	0.226	0.226	0.234	0.236	0.232	0.224	0.234	0.232	0.236	0.232	0.234	0.23	0.235	0.235	0.311	0.311	0.307	0.301	0.306	0.308	0.308	0.311	0.311	0.308	0.304	0.308	0.306	0.308	0.311	0.306	0.309	0.308	0.308	0.314	0.315	0.313	0.308	0.308	0.304	0.311	0.308	0.308	0.311
AB1_EB4_11_22_Ophiomyces_sp_Species_26	0.234	0.232	0.232	0.228	0.226	0.23	0.224	0.224	0.232	0.234	0.23	0.222	0.232	0.23	0.234	0.23	0.232	0.228	0.233	0.233	0.313	0.313	0.309	0.304	0.308	0.311	0.311	0.313	0.313	0.311	0.306	0.311	0.308	0.311	0.313	0.308	0.311	0.311	0.311	0.316	0.318	0.315	0.311	0.311	0.306	0.313	0.311	0.311	0.313
AB1_EB4_11_24_Ophiomyces_sp_Species_26	0.234	0.228	0.228	0.228	0.226	0.23	0.224	0.224	0.228	0.234	0.23	0.222	0.228	0.23	0.23	0.226	0.232	0.228	0.233	0.233	0.311	0.311	0.307	0.301	0.306	0.308	0.308	0.311	0.311	0.308	0.304	0.308	0.306	0.308	0.311	0.306	0.309	0.308	0.308	0.314	0.315	0.313	0.308	0.308	0.304	0.311	0.308	0.308	0.311
AB1_EB4_11_25_Ophiomyces_sp_Species_26	0.238	0.236	0.236	0.232	0.23	0.234	0.228	0.228	0.236	0.238	0.234	0.226	0.236	0.234	0.238	0.234	0.236	0.232	0.237	0.237	0.308	0.308	0.304	0.299	0.304	0.306	0.306	0.308	0.313	0.306	0.301	0.306	0.304	0.306	0.308	0.304	0.306	0.306	0.306	0.311	0.313	0.311	0.306	0.306	0.301	0.308	0.306	0.306	0.308
AB1_EB4_11_26_Ophiomyces_sp_Species_26	0.238	0.236	0.236	0.232	0.23	0.234	0.228	0.228	0.236	0.238	0.234	0.226	0.236	0.234	0.238	0.234	0.236	0.232	0.235	0.235	0.313	0.313	0.309	0.304	0.308	0.311	0.311	0.313	0.313	0.311	0.306	0.311	0.308	0.311	0.313	0.308	0.311	0.311	0.313	0.316	0.318	0.315	0.311	0.311	0.306	0.313	0.311	0.311	0.313
KU519563.1_NHM_041_Ophiomyces_sp_Species_26	0.235	0.233	0.233	0.229	0.227	0.231	0.225	0.225	0.233	0.235	0.231	0.223	0.233	0.231	0.235	0.231	0.233	0.229	0.234	0.234	0.315	0.315	0.31	0.306	0.31	0.313	0.313	0.315	0.315	0.313	0.308	0.313	0.31	0.313	0.315	0.31	0.31	0.313	0.313	0.317	0.317	0.317	0.313	0.313	0.308	0.315	0.313	0.31	0.315
AB2_EB1_13_5_Ophiocantha_cosmica_Species_27	0.387	0.382	0.392	0.374	0.384	0.384	0.382	0.376	0.379	0.377	0.382	0.379	0.387	0.379	0.387	0.387	0.39	0.384	0.363	0.363	0.451	0.454	0.455	0.46	0.448	0.454	0.454	0.451	0.454	0.454	0.46	0.454	0.454	0.454	0.457	0.457	0.446	0.457	0.448	0.455	0.463	0.46	0.454	0.454	0.454	0.454	0.454	0.454	0.454
MA13_85_30_Ophiocantha_cosmica_Species_27	0.384	0.378	0.389	0.371	0.381	0.381	0.379	0.373	0.376	0.373	0.378	0.376	0.384	0.376	0.384	0.384	0.386	0.381	0.359	0.359	0.456	0.459	0.46	0.462	0.453	0.459	0.459	0.456	0.459	0.459	0.465	0.459	0.459	0.459	0.462	0.462	0.45	0.462	0.453	0.459	0.468	0.465	0.459	0.459	0.459	0.458	0.459	0.459	0.459
MA14_20_4_Ophiocantha_cosmica_Species_27	0.386	0.381	0.392	0.373	0.384	0.384	0.381	0.376	0.379	0.376	0.381	0.378	0.386	0.378	0.386	0.386	0.389	0.384	0.362	0.362	0.459	0.462	0.463	0.465	0.456	0.462	0.462	0.459	0.462	0.462	0.468	0.462	0.462	0.462	0.465	0.465	0.453	0.465	0.456	0.463	0.471	0.468	0.462	0.462	0.462	0.462	0.462	0.462	0.462
SO239_403_Ophiocantha_cosmica_Species_27	0.387	0.382	0.392	0.374	0.384	0.384	0.382	0.376	0.379	0.377	0.382	0.379	0.387	0.379	0.387	0.387	0.39	0.384	0.365	0.365	0.46	0.463	0.464	0.46	0.457	0.463	0.463	0.46	0.463	0.463	0.469	0.463	0.463	0.463	0.466	0.466	0.454	0.466	0.457	0.464	0.472	0.469	0.463	0.463	0.457	0.463	0.463	0.463	0.463
SO239_130_Ophiocantha_cosmica_Species_27	0.386	0.381	0.391	0.373	0.383	0.383	0.381	0.375	0.378	0.376	0.381	0.378	0.386	0.378	0.386	0.386	0.389	0.383	0.363	0.363	0.453	0.456	0.457	0.459	0.45	0.456	0.456	0.453	0.456	0.456	0.461	0.456	0.456	0.456	0.459	0.459	0.45	0.459	0.45	0.456	0.465	0.461	0.456	0.456	0.456	0.455	0.456	0.456	0.456
SO239_407_Ophiocantha_cosmica_Species_27	0.384	0.378	0.389	0.371	0.381	0.381	0.379	0.373	0.376	0.373	0.378	0.376	0.384	0.376	0.384	0.384	0.386	0.381	0.359	0.359	0.456	0.459	0.46	0.462	0.453	0.459	0.459	0.456	0.459	0.459	0.465	0.459	0.459	0.459	0.462	0.462	0.45	0.462	0.453	0.459	0.468	0.465	0.459	0.459	0.459	0.458	0.459	0.459	0.459
SO239_408_Ophiocantha_cosmica_Species_27	0.384	0.378	0.389	0.371	0.381	0.381	0.379	0.373	0.376	0.373	0.378	0.376	0.384	0.376	0.384	0.384	0.386	0.381	0.359	0.359	0.456	0.459	0.46	0.462	0.453	0.459	0.459	0.456	0.459	0.459	0.465	0.459	0.459	0.459	0.462	0.462	0.45	0.462	0.453	0.459	0.468	0.465	0.459	0.459	0.459	0.458	0.459	0.459	0.459
SO239_409_Ophiocantha_cosmica_Species_27	0.384	0.378	0.389	0.371	0.381	0.381	0.379	0.373	0.376	0.373	0.378	0.376	0.384	0.376	0.384	0.384	0.386	0.381	0.359	0.359	0.456	0.459	0.46	0.462	0.453	0.459	0.459	0.456	0.459	0.459	0.465	0.459	0.459	0.459	0.462	0.462	0.45	0.462	0.453	0.459	0.468	0.465	0.459	0.459	0.459	0.458	0.459	0.459	0.459
SO239_411-2_Ophiocantha_cosmica_Species_27	0.386	0.381	0.392	0.373	0.384	0.384	0.381	0.376	0.379	0.376	0.381	0.378	0.386	0.378	0.386	0.386	0.389	0.384	0.362	0.362	0.453	0.456	0.457	0.459	0.45	0.456	0.456	0.453	0.456	0.456	0.462	0.456	0.456	0.456	0.459	0.459	0.447	0.459	0.45	0.456	0.465	0.462	0.456	0.456	0.456	0.455	0.456	0.456	0.456
SO239_412_Ophiocantha_cosmica_Species_27	0.384	0.378	0.389	0.371	0.381	0.381	0.379	0.373	0.376	0.373	0.378	0.376	0.384	0.376	0.384	0.384	0.386	0.381	0.359	0.359	0.456	0.459	0.46	0.462	0.453	0.459	0.459	0.456	0.459	0.459	0.465	0.459	0.459	0.459	0.462	0.462	0.45	0.462	0.453	0.459	0.468	0.465	0.459	0.459	0.459	0.458	0.459	0.459	0.459
SO239_413_Ophiocantha_cosmica_Species_27	0.384	0.378	0.389	0.371	0.381	0.381	0.379	0.373	0.376	0.373	0.378	0.376	0.384	0.376	0.384	0.384	0.386	0.381	0.359	0.359	0.456	0.459	0.46	0.462	0.453	0.459	0.459	0.456	0.459	0.459	0.465	0.459	0.459	0.459	0.462	0.462	0.45	0.462	0.453	0.459	0.468	0.465	0.459	0.459	0.459	0.458	0.459	0.459	0.459
SO239_414_Ophiocantha_cosmica_Species_27	0.384	0.378	0.389	0.371	0.381	0.381	0.379	0.373	0.376	0.373	0.378	0.376	0.384	0.376	0.384	0.384	0.386	0.381	0.359	0.359	0.456	0.459	0.46	0.462	0.453	0.459	0.459	0.456	0.459	0.459	0.465	0.459	0.459	0.459	0.462	0.462	0.45	0.462	0.453	0.459	0.468	0.465	0.459	0.459	0.459	0.458	0.459	0.459	0.459
SO239_415_Ophiocantha_cosmica_Species_27	0.386	0.381	0.392	0.373	0.384	0.384	0.381	0.376	0.379	0.376	0.381	0.378	0.386	0.378	0.386	0.386	0.389	0.384	0.362	0.362	0.453	0.456	0.457	0.459	0.45	0.456	0.456	0.453	0.456	0.456	0.462	0.456	0.456	0.456	0.459	0.459	0.447	0.459	0.45	0.456	0.465	0.462	0.456	0.456	0.456	0.455	0.456	0.456	0.456
SO239_416_Ophiocantha_cosmica_Species_27	0.384	0.378	0.389	0.371	0.381	0.381	0.379	0.373	0.376	0.373	0.378	0.376	0.384	0.376	0.384	0.384	0.386	0.381	0.359	0.359	0.456	0.459	0.46	0.462	0.453	0.459	0.459	0.456	0.459	0.459	0.465	0.459	0.459	0.459	0.462	0.462	0.45	0.462	0.453	0.459	0.468	0.465	0.459	0.459	0.459	0.458	0.459	0.459	0.459
SO239_417_Ophiocantha_cosmica_Species_27	0.381	0.376	0.386	0.368	0.378	0.378	0.376	0.371	0.373	0.371	0.376	0.373	0.381	0.373	0.381	0.381	0.384	0.378	0.359	0.359	0.456	0.459	0.46	0.462	0.453	0.459	0.459	0.456	0.459	0.459	0.465	0.459	0.459	0.459	0.462	0.462	0.45	0.462	0.453	0.459	0.468	0.465	0.459	0.459	0.459	0.458	0.459	0.459	0.459
SO239_418_Ophiocantha_cosmica_Species_27	0.384	0.378	0.389	0.371	0.381	0.381	0.379	0.373	0.376	0.373	0.378	0.376	0.384	0.376	0.384	0.384	0.386	0.381	0.359	0.359	0.456	0.459	0.46	0.462	0.453	0.459	0.459	0.456	0.459	0.459	0.465	0.459	0.459	0.459	0.462	0.462	0.45	0.462	0.453	0.459	0.468	0.465	0.459	0.459	0.459	0.458	0.459	0.459	0.459
SO239_419_Ophiocantha_cosmica_Species_27	0.384	0.378	0.389	0.371	0.381	0.381	0.379	0.373	0.376	0.373	0.378	0.376	0.384	0.376	0.384	0.384	0.386	0.381	0.359	0.359	0.456	0.459	0.46	0.462	0.453	0.459	0.459	0.456	0.459	0.459	0.465	0.459	0.459	0.459	0.462	0.462	0.45	0.462	0.453	0.459	0.468	0.465	0.459	0.459	0.459	0.458	0.459	0.459	0.459
SO242_2_176_F7_Ophiocantha_cosmica_Species_27	0.384	0.378	0.389	0.371	0.381	0.381	0.379	0.373	0.376	0.373	0.378	0.376	0.384	0.376	0.384	0.384	0.386	0.381	0.359	0.359	0.456	0.459	0.46	0.462	0.453	0.459	0.459	0.456	0.459	0.459	0.465	0.459	0.459	0.459	0.462	0.462	0.45	0.462	0.453	0.459	0.468	0.465	0.459	0.459	0.459	0.458	0.459	0.459	0.459
SO242_2_191_F5_Ophiocantha_cosmica_Species_27	0.384	0.378	0.389	0.371	0.381	0.381	0.379	0.373	0.376	0.373	0.378	0.376	0.384	0.376	0.384	0.384	0.386	0.381	0.359	0.359	0.456	0.459	0.46	0.462	0.453	0.459	0.459	0.456	0.459	0.459	0.465	0.459	0.459	0.459	0.462	0.462	0.45	0.462	0.453	0.459	0.468	0.465	0.459	0.459	0.459	0.458	0.459	0.459	0.459
AB2_EB2_12_13_Ophiotholia_sp_Species_28	0.288	0.282	0.279	0.282	0.284	0.286	0.288	0.286	0.277	0.282	0.277	0.277	0.284	0.288	0.284	0.284	0.288	0.284	0.274	0.274	0.378	0.381	0.379	0.384	0.378	0.384	0.381	0.379	0.378	0.381	0.376	0.381	0.381	0.381	0.384	0.381	0.376	0.381	0.384	0.387	0.389	0.386	0.381	0.384	0.381	0.378	0.381	0.379	0.384
SO239_197_3_Ophitholia_sp_Species_28	0.286	0.275	0.273	0.275	0.277	0.279	0.279	0.275	0.271	0.275	0.271	0.271	0.277	0.282	0.277	0.277	0.282	0.277	0.269	0.269	0.39	0.39	0.388	0.392	0.387	0.392	0.39	0.387	0.381	0.39	0.384	0.39	0.39	0.39	0.392	0.39	0.385	0.39	0.392	0.396	0.398	0.395	0.39	0.392	0.395	0.387	0.39	0.39	0.392
MA14_66_10_Ophiotholia_sp2_Species_28	0.314	0.308	0.308	0.305	0.311	0.311	0.308	0.3	0.305	0.308	0.3	0.3	0.308	0.308	0.305	0.308	0.314	0.311	0.3	0.3	0.402	0.402	0.399	0.402	0.399	0.402	0.402	0.402	0.399	0.402	0.396	0.402	0.402	0.402	0.405	0.405	0.396	0.402	0.402	0.402	0.405	0.409	0.402	0.402	0.402	0.398	0.402	0.396	0.405
KU519559.1_NHM_076_Ophiotholia_sp_Species_28	0.296	0.289	0.287	0.289	0.292	0.294	0.296	0.294	0.285	0.289	0.285	0.285	0.292	0.294	0.292	0.292	0.296	0.291	0.282	0.282	0.375	0.378	0.375	0.38	0.375	0.38	0.378	0.375	0.375	0.378	0.372	0.378	0.378	0.378	0.38	0.378	0.375	0.378	0.38	0.383	0.383	0.383	0.378	0.38	0.378	0.375	0.378	0.372	0.38
KU519560.1_NHM_078_Ophiotholia_Species_28	0.296	0.289	0.287	0.289	0.292	0.294	0.296	0.294	0.285	0.289	0.285	0.285	0.292	0.294	0.292	0.292	0.296	0.291	0.282	0.282	0.375	0.378	0.375	0.38	0.375	0.38	0.378	0.375	0.375	0.378	0.372	0.378	0.378	0.378	0.38	0.378	0.375	0.378	0.38	0.383	0.383	0.383	0.378	0.38	0.378	0.375	0.378	0.372	0.38
KU519561.1_NHM_104_Ophiotholia_Species_28	0.296	0.289	0.287	0.289	0.292	0.294	0.296	0.294	0.285	0.289	0.285	0.285	0.292	0.294	0.292	0.292	0.296	0.291	0.282	0.282	0.372	0.375	0.372	0.377	0.372	0.378	0.375	0.372	0.372	0.375	0.37	0.375	0.375	0.375	0.378	0.375	0.373	0.375	0.377	0.38	0.38	0.38	0.375	0.378	0.375	0.372	0.375	0.37	0.378
KU519562.1_NHM_119_Ophiotholia_Species_28	0.296	0.289	0.287	0.289	0.292	0.294	0.296	0.294	0.285	0.289	0.285	0.285	0.292	0.294	0.292	0.292	0.296	0.291	0.282	0.282	0.372	0.375	0.372	0.377	0.372	0.378	0.375	0.372	0.372	0.375	0.37	0.375	0.375	0.375	0.378	0.375	0.373	0.375	0.377	0.38	0.38	0.38	0.375	0.378	0.375	0.372	0.375	0.37	0.378
AB1_EB4_11_23_Ophioleucidae_sp_Species_29	0.26	0.255	0.255	0.251	0.257	0.26	0.26	0.257	0.257	0.258	0.258	0.26	0.255	0.257	0.255	0.255	0.26	0.26	0.258	0.258	0.33	0.33	0.333	0.328	0.322	0.33	0.33	0.325	0.325	0.33	0.325	0.33	0.327	0.33	0.332	0.332	0.318	0.33	0.325	0.335	0.337	0.335	0.33	0.327	0.335	0.33	0.33	0.33	0.332
AB1_EB4_11_29_Ophioleucidae_sp_Species_29	0.262	0.257	0.257	0.253	0.26	0.262	0.262	0.259	0.26	0.26	0.26	0.262	0.257	0.26	0.257	0.257	0.262	0.262	0.26	0.26	0.332	0.332	0.335	0.33	0.325	0.332	0.332	0.327	0.327	0.332	0.327	0.332	0.33	0.332	0.335	0.335	0.32	0.332	0.327	0.338	0.34	0.337	0.332	0.33	0.337	0.332	0.332	0.332	0.335
AB2_EB2_12_7_Ophioleucidae_sp_Species_29	0.26	0.255	0.255	0.251	0.257	0.26	0.26	0.257	0.257	0.258	0.258	0.26	0.255	0.257	0.255	0.255	0.26	0.26	0.258	0.258	0.33	0.33	0.333	0.328	0.322	0.33	0.33	0.325	0.325	0.33	0.325	0.33	0.327	0.33	0.332	0.332	0.318	0.33	0.325	0.335	0.337	0.335	0.33	0.327	0.335	0.33	0.33	0.33	0.332
AB2_EB1_13_17_Ophioleucidae_sp_Species_29	0.258	0.258	0.257	0.253	0.26	0.262	0.258	0.26	0.26	0.26	0.26	0.262	0.257	0.26	0.257	0.257	0.257	0.262	0.26	0.26	0.33	0.33	0.333	0.328	0.322	0.33	0.33	0.325	0.325	0.33	0.325	0.33	0.327	0.33	0.332	0.332	0.318	0.33	0.325	0.335	0.337	0.335	0.33	0.327	0.335	0.33	0.33	0.33	0.332
AB2_EB1_13_38_Ophioleucidae_sp_Species_29	0.26	0.255	0.255	0.251	0.257	0.26	0.26	0.257	0.257	0.258	0.258	0.26	0.255	0.257	0.255	0.255	0.26	0.26	0.258	0.258	0.33	0.33	0.333	0.328	0.322	0.33	0.33	0.325	0.325	0.33	0.325	0.33	0.327	0.33	0.332	0.332	0.318	0.33	0.325	0.335	0.337	0.335	0.33	0.327	0.335	0.33	0.33	0.33	0.332
MA14_38_5_Ophioleucidae_sp_Species_29	0.258	0.253	0.253	0.249	0.255	0.257	0.258	0.255	0.255	0.255	0.255	0.257	0.253	0.255	0.253	0.253	0.257	0.257	0.255	0.255	0.33	0.33	0.333	0.327	0.322	0.33	0.33	0.325	0.325	0.33	0.325	0.33	0.327	0.33	0.332	0.332	0.318	0.33	0.325	0.335	0.337	0.334	0.33	0.327	0.335	0.33	0.33	0.329	0.332
MA14_66_5_Ophioleucidae_sp_Species_29	0.26	0.255	0.255	0.251	0.257	0.26	0.26	0.257	0.257	0.258	0.258	0.26	0.255	0.257	0.255	0.255	0.26	0.26	0.258	0.258	0.33	0.33	0.333	0.328	0.322	0.33	0.33	0.325	0.325	0.33	0.325	0.33	0.327	0.33	0.332	0.332	0.318	0.33	0.325	0.335	0.337	0.335	0.33	0.327	0.335	0.33	0.33	0.33	0.332
MA14_66_6_Ophioleucidae_sp_Species_29	0.251	0.251	0.251	0.251	0.253	0.255	0.251	0.255	0.255	0.258	0.253	0.255	0.251	0.253	0.251	0.251	0.251	0.255	0.258	0.258	0.332	0.332	0.336	0.325	0.335	0.332	0.332	0.328	0.327	0.332	0.328	0.332	0.33	0.333	0.335	0.335	0.32	0.332	0.328	0.338	0.34	0.337	0.332	0.33	0.332	0.333	0.332	0.332	0.335
MA13_85_37_Ophioleucidae_sp_Species_29	0.258	0.253	0.253	0.249	0.255	0.257	0.258	0.255	0.255	0.255	0.255	0.257	0.253	0.255	0.253	0.253	0.257	0.257	0.255	0.255	0.332	0.332	0.336	0.33	0.325	0.332	0.332	0.328	0.327	0.332	0.328	0.332	0.33	0.333	0.335	0.335	0.32	0.332	0.328	0.338	0.34	0.337	0.332	0.33	0.337	0.333	0.332	0.332	0.335
NODBIO_33_23_Ophioleucidae_sp_Species_29	0.258	0.253	0.253	0.249	0.255	0.257	0.258	0.255	0.255	0.255	0.255	0.257	0.253	0.255	0.253	0.253	0.257	0.257	0.255	0.255	0.33	0.33	0.333	0.328	0.322	0.33	0.33	0.325	0.325	0.33	0.325	0.33	0.327	0.33	0.332	0.332	0.318	0.33	0.325	0.335	0.337	0.335	0.33	0.327	0.335	0.33	0.33	0.33	0.332
NODBIO_101_3_Ophioleucidae_sp_Species_29	0.26	0.256	0.256	0.251	0.258	0.26	0.26	0.258	0.258	0.258	0.258	0.26	0.256	0.258	0.256	0.256	0.26	0.26	0.258	0.258	0.33	0.33	0.334	0.328	0.323	0.33	0.33	0.326	0.325	0.33	0.326	0.33	0.328	0.331	0.333	0.333	0.318	0.33	0.326	0.336	0.338	0.335	0.33	0.328	0.336	0.331	0.33	0.33	0.333
SO239_20_5_Ophioleucidae_sp_Species_29	0.26	0.255	0.255	0.251	0.257	0.26	0.26	0.257	0.257	0.258	0.258	0.26	0.255	0.257	0.255	0.255	0.26	0.26	0.258	0.258	0.33	0.33	0.333	0.328	0.322	0.33	0.33	0.325	0.325	0.33	0.325	0.33	0.327	0.33	0.332	0.332	0.318	0.33	0.325	0.335	0.337	0.335	0.33	0.327	0.335	0.33	0.33	0.33	0.332
SO239_24_3_Ophioleucidae_sp_Species_29	0.26	0.255	0.255	0.251	0.257	0.26	0.26	0.257	0.257	0.258	0.258	0.26	0.255	0.257	0.255	0.255	0.26	0.26	0.258	0.258	0.33	0.33	0.333	0.328	0.322	0.33	0.33	0.325	0.325	0.33	0.325	0.33	0.327	0.33	0.332	0.332	0.318	0.33	0.325	0.335	0.337	0.335	0.33	0.327	0.335	0.33	0.33	0.33	0.332
SO239_24_12_Ophioleucidae_sp_Species_29	0.26	0.255	0.255	0.251	0.257	0.26	0.26	0.257	0.257	0.258	0.258	0.26	0.255	0.257	0.255	0.255	0.26	0.26	0.258	0.258	0.33	0.33	0.333	0.328	0.322	0.33	0.33	0.325	0.325	0.33	0.325	0.33	0.327	0.33	0.332	0.332	0.318	0.33	0.325	0.335	0.337	0.335	0.33	0.327	0.335	0.33	0.33	0.33	0.332
SO239_24_14_Ophioleucidae_sp_Species_29	0.26	0.255	0.255	0.251	0.257	0.26	0.26	0.257	0.257	0.258	0.258	0.26	0.255	0.257	0.255	0.255	0.26	0.26	0.258	0.258	0.33	0.33	0.333	0.328	0.322	0.33	0.33	0.325	0.325	0.33	0.325	0.33	0.327	0.33	0.332	0.332	0.318	0.33	0.325	0.335	0.337	0.335	0.33	0.327	0.335	0.33	0.33	0.33	0.332
SO239_24_26_Ophioleucidae_sp_Species_29	0.26	0.255	0.255	0.251	0.257	0.26	0.26	0.257	0.257	0.258	0.258	0.26	0.255	0.257	0.255	0.255	0.26	0.26	0.258	0.258	0.33	0.33	0.333	0.328	0.322	0.33	0.33	0.325	0.325	0.33	0.325	0.33	0.327	0.33	0.332	0.332	0.318	0.33	0.325	0.335	0.337	0.335	0.33	0.327	0.335	0.33	0.33	0.33	0.332
SO239_81_6_Ophioleucidae_sp_Species_29	0.262	0.258	0.258	0.253	0.26	0.262	0.262	0.26	0.26	0.26	0.26	0.262	0.258	0.26	0.258	0.258	0.262	0.262	0.26	0.26	0.333	0.333	0.336	0.331	0.325	0.333	0.333	0.328	0.328	0.333	0.328	0.333	0.33	0.333	0.333	0.336	0.321	0.333	0.328	0.339	0.341	0.335	0.333	0.33	0.338	0.333	0.333	0.333	0.336
SO239_81_10_Ophioleucidae_sp_Species_29	0.265	0.26	0.26	0.256	0.262	0.265	0.265	0.262	0.262	0.263	0.263	0.265	0.26	0.262	0.26	0.26	0.265	0.265	0.263	0.263	0.331	0.331	0.333	0.329	0.323	0.331	0.331	0.326	0.326	0.331	0.326	0.331	0.328	0.331	0.333	0.333	0.321	0.331	0.326	0.336	0.336	0.336	0.331	0.328	0.336	0.331	0.331	0.328	0.333
SO239_81_19_Ophioleucidae_sp_Species_29	0.26	0.255	0.255	0.251	0.257	0.26	0.26	0.257	0.257	0.258	0.258	0.26	0.255	0.257	0.255	0.255	0.26	0.26	0.258	0.258	0.33	0.33	0.333	0.328	0.322	0.33	0.33	0.325	0.325	0.33	0.325	0.33	0.327	0.33	0.332	0.332	0.318	0.33	0.325	0.335	0.337	0.335	0.33	0.327	0.335	0.33	0.33	0.33	0.332
SO239_81_22_Ophioleucidae_sp_Species_29	0.26	0.255	0.255	0.251	0.257	0.26	0.26	0.257	0.257	0.258	0.258	0.26	0.255	0.257	0.255	0.255	0.26	0.26	0.258	0.258	0.33	0.33	0.333	0.328	0.322	0.33	0.33	0.325	0.325	0.33	0.325	0.33	0.327	0.33	0.332	0.332	0.318	0.33	0.325	0.335	0.337	0.335	0.33	0.327	0.335	0.33	0.33	0.33	0.332
SO239_118_9_Ophioleucidae_sp_Species_29	0.26	0.255	0.255	0.251	0.257	0.26	0.26	0.257	0.257	0.258	0.258	0.26	0.255	0.257	0.255	0.255	0.26	0.26	0.258	0.258	0.33	0.33	0.333	0.328	0.322	0.33	0.33	0.325	0.325	0.33	0.325	0.33	0.327	0.33	0.332	0.332	0.318	0.33	0.325	0.335	0.337	0.335	0.33	0.327	0.335	0.33	0.33	0.33	0.332
SO239_133_1_Ophioleucidae_sp_Species_29	0.253	0.253	0.251	0.253	0.255	0.257	0.253	0.257	0.257	0.26	0.255	0.257	0.253	0.255	0.253	0.253	0.253	0.257	0.258	0.258	0.335	0.335	0.338	0.328	0.338	0.335	0.335	0.33	0.33	0.335	0.33	0.335	0.333	0.335	0.338	0.338	0.323	0.335	0.33	0.341	0.343	0.34	0.335	0.333	0.335	0.335	0.335	0.335	0.338
SO239_133_4_Ophioleucidae_sp_Species_29	0.26	0.255	0.255	0.251	0.257	0.26	0.26	0.257	0.257	0.258	0.258	0.26	0.255	0.257	0.255	0.255	0.26	0.26	0.258	0.258	0.33	0.33	0.333	0.328	0.322	0.33	0.33	0.325	0.325	0.33	0.325	0.33	0.327	0.33	0.332	0.332	0.318	0.33	0.325	0.335	0.337	0.335	0.33	0.327	0.335	0.33	0.33	0.33	0.332
SO239_158_2_Ophioleucidae_sp_Species_29	0.255	0.251	0.251	0.247	0.253	0.255	0.255	0.253	0.253	0.253	0.253	0.255	0.251	0.253	0.251	0.251	0.255	0.255	0.253	0.253	0.33	0.33	0.333	0.327	0.322	0.33	0.33	0.325	0.325	0.33	0.325	0.33	0.327	0.33	0.332	0.332	0.318	0.33	0.325	0.335	0.337	0.334	0.33	0.327	0.335	0.33	0.33	0.329	0.332
SO242_1_227_D6_Ophioleucidae_sp_Species_29	0.26	0.255	0.255	0.251	0.257	0.26	0.26	0.257	0.257	0.258	0.258	0.26	0.255	0.257	0.255	0.255	0.26	0.26	0.258	0.258	0.327	0.327	0.33	0.325	0.32	0.327	0.327	0.323	0.322	0.327	0.323	0.327	0.325	0.328	0.33	0.33	0.315	0.327	0.323	0.333	0.335	0.332	0.327	0.325	0.332	0.328	0.327	0.327	0.33
53_053_1_Ophioscolecidae_Species_29	0.251	0.251	0.251	0.251	0.253	0.255	0.251	0.255	0.255	0.258	0.253	0.255	0.251	0.253	0.251	0.251	0.251	0.255	0.258	0.258	0.332	0.332	0.336	0.325	0.335	0.332	0.332	0.328	0.327	0.332	0.328	0.332	0.33	0.333	0.335	0.335	0.32	0.332	0.328	0.338	0.34	0.337	0.332	0.33	0.332	0.333	0.332	0.332	0.335
53_175_3_Ophioleucidae_Species_29	0.26	0.255	0.255	0.251	0.257	0.26	0.26	0.257	0.257	0.258	0.258	0.26	0.255	0.257	0.255	0.255	0.26	0.26	0.258	0.258	0.33	0.33	0.333	0.328	0.322	0.33	0.33	0.325	0.325	0.33	0.325	0.33	0.327	0.33	0.332	0.332	0.318	0.33	0.325	0.335	0.337	0.335	0.33	0.327	0.335	0.33	0.33	0.33	0.332
53_175_6_Ophioleucidae_Species_29	0.258	0.253	0.253	0.249	0.255	0.257	0.258	0.255	0.255	0.255	0.255	0.257	0.253	0.255	0.253	0.253	0.257	0.257	0.255	0.255	0.33	0.33	0.333	0.328	0.322	0.33	0.33	0.325	0.325	0.33	0.325	0.33	0.327	0.33	0.332	0.332	0.318	0.33	0.325	0.335	0.337	0.335	0.33	0.327	0.335	0.33	0.33	0.33	0.332
AB1_EB5_4_Ophiotypa_simplex_Species_30	0.253	0.262	0.264	0.259	0.262	0.266	0.259	0.259	0.255	0.262	0.266	0.264	0.257	0.259	0.266	0.259	0.261	0.259	0.267	0.267	0.278	0.273	0.271	0.271	0.273	0.273	0.273	0.275	0.273	0.273	0.269	0.273	0.273	0.273	0.275	0.275	0.274	0.273	0.275	0.278	0.278	0.277	0.273	0.271	0.273	0.273	0.273	0.271	0.275
AB2_EB2_12_3_Ophiotypa_simplex_Species_30	0.255	0.264	0.266	0.262	0.264	0.268	0.261	0.262	0.257	0.264	0.268	0.266	0.259	0.262	0.268	0.262	0.264	0.266	0.267	0.267	0.271	0.266	0.265	0.264	0.266	0.266	0.266	0.269	0.266	0.266	0.262	0.266	0.266	0.266	0.269	0.269	0.267	0.266	0.269	0.271	0.271	0.271	0.266	0.264	0.266	0.266	0.266	0.264	0.269
AB2_EB1_16_3_Ophiotypa_simplex_Species_30	0.262	0.266	0.268	0.264	0.266	0.27	0.268	0.264	0.259	0.266	0.27	0.268	0.262	0.264	0.27	0.264	0.27	0.264	0.269	0.269	0.273	0.269	0.267	0.266	0.269	0.269	0.269	0.271	0.269	0.269	0.264	0.269	0.269	0.269	0.271	0.271	0.269	0.269	0.271	0.273	0.273	0.273	0.269	0.266	0.269	0.268	0.269	0.266	0.271
SO239_81_9_Ophiotypa_simplex_Species_30	0.259	0.268	0.27	0.266	0.268	0.273	0.266	0.266	0.262	0.268	0.273	0.27	0.264	0.266	0.273	0.266	0.268	0.266	0.271	0.271	0.273	0.269	0.267	0.266	0.269	0.269	0.269	0.271	0.269	0.269	0.264	0.269	0.269	0.269	0.271	0.271	0.269	0.269	0.271	0.273	0.273	0.273	0.269	0.266	0.269	0.268	0.269	0.266	0.271
KM_1307_Ophiotypa_simplex_Species_30	0.259	0.268	0.27	0.266	0.268	0.273	0.266	0.266	0.262	0.268	0.273	0.27	0.264	0.266	0.273	0.266	0.268	0.266	0.271	0.271	0.273	0.269	0.267	0.266	0.269	0.269	0.269	0.271	0.269	0.269	0.264	0.269	0.269	0.269	0.271	0.271	0.269	0.269	0.271	0.273	0.273	0.273	0.269	0.266	0.269	0.268	0.269	0.266	0.271
SO239_118_1_Ophiotypa_simplex_Species_30	0.259	0.268	0.27	0.266	0.268	0.272	0.266	0.266	0.262	0.268	0.272	0.27	0.264	0.266	0.272	0.266	0.268	0.266	0.271	0.271	0.271	0.266	0.265	0.264	0.266	0.266	0.266	0.269	0.266	0.266	0.262	0.266	0.266	0.266	0.269	0.269	0.267	0.266	0.269	0.271	0.271	0.271	0.266	0.264	0.266	0.266	0.266	0.264	0.269
MA14_21_12_Ophiernus_sp_Species_31	0.236	0.228	0.236	0.234	0.23	0.232	0.226	0.23	0.226	0.232	0.226	0.228	0.23	0.232	0.228	0.232	0.228	0.232	0.242	0.242	0.293	0.29	0.293	0.288	0.29	0.293	0.29	0.293	0.29	0.29	0.286	0.29	0.288	0.29	0.293	0.293	0.29	0.29	0.29	0.298	0.295	0.295	0.29	0.29	0.29	0.288	0.29	0.29	0.288
53_070_1_Ophiernus_adspersus_Species_31	0.236	0.232	0.236	0.234	0.23	0.232	0.23	0.23	0.23	0.236	0.226	0.232	0.23	0.236	0.228	0.232	0.228	0.232	0.242	0.242	0.279	0.281	0.284	0.284	0.286	0.284	0.281	0.279	0.281	0.281	0.277	0.281	0.279	0.281	0.284	0.284	0.281	0.281	0.281	0.289	0.286	0.286	0.281	0.281	0.286	0.279	0.281	0.286	0.279
53_70_02_Ophiernus_adspersus_Species_31	0.232	0.228	0.232	0.23	0.226	0.228	0.226	0.226	0.226	0.232	0.222	0.228	0.226	0.232	0.224	0.228	0.224	0.228	0.237	0.237	0.283	0.286	0.289	0.288	0.29	0.288	0.286	0.284	0.286	0.286	0.281	0.286	0.286	0.286	0.288	0.288	0.286	0.286	0.286	0.293	0.29	0.29	0.286	0.286	0.29	0.284	0.286	0.288	0.283
SO242_1_309_Ophiernus_sp_Species_31	0.232	0.232	0.232	0.234	0.23	0.232	0.23	0.23	0.23	0.236	0.226	0.232	0.226	0.238	0.228	0.228	0.224	0.232	0.235	0.235	0.277	0.279	0.282	0.286	0.283	0.281	0.279	0.277	0.279	0.279	0.279	0.279	0.277	0.279	0.281	0.281	0.279	0.279	0.279	0.286	0.283	0.283	0.279	0.279	0.283	0.277	0.279	0.283	0.277
SO239_192_6_Ophiuroidea_sp7_Species_32	0.274	0.274	0.281	0.287	0.274	0.283	0.278	0.276	0.278	0.287	0.278	0.278	0.278	0.274	0.276	0.276	0.285	0.276	0.282	0.282	0.292	0.289	0.289	0.287	0.296	0.289	0.285	0.289	0.292	0.287	0.285	0.287	0.287	0.289	0.289	0.285	0.296	0.287	0.287	0.289	0.287	0.289	0.289	0.287	0.289	0.285	0.287	0.287	0.289
AB1_EB5_10_9_Ophiohelidae_sp7_Species_33	0.342	0.335	0.337	0.342	0.334	0.339	0.342	0.332	0.332	0.325	0.33	0.339	0.334	0.332	0.33	0.337	0.342	0.342	0.337	0.337	0.339	0.339	0.345	0.337	0.341	0.339	0.339	0.341	0.339	0.339	0.334	0.339	0.339	0.339	0.341	0.341	0.334	0.341	0.334	0.344	0.346	0.339	0.339	0.341	0.344	0.334	0.339	0.341	0.339
MA14_21_3_Ophioscolecidae_sp_Species_34	0.308	0.308	0.311	0.313	0.311	0.315	0.311	0.313	0.308	0.311	0.313	0.315	0.308	0.308	0.306	0.308	0.311	0.313	0.292	0.292	0.342	0.342	0.346	0.338	0.35	0.342	0.342	0.335	0.345	0.342	0.338	0.342	0.342	0.34	0.337	0.345	0.338	0.342	0.338	0.34	0.35	0.342	0.342	0.34	0.345	0.343	0.342	0.345	0.342
AB2_EB1_13_6_Ophioleucidae_sp_Species_35	0.348	0.348	0.343	0.353	0.353	0.353	0.351	0.346	0.351	0.346	0.351	0.348	0.346	0.356	0.343	0.348	0.353	0.351	0.334	0.334	0.36	0.355	0.353	0.352	0.355	0.355	0.352	0.358	0.352	0.355	0.355	0.355	0.355	0.355	0.355	0.35	0.357	0.355	0.35	0.355	0.363	0.357	0.355	0.357	0.36	0.352	0.355	0.355	0.352
AB2_EB1_13_24_Ophioleucidae_sp_Species_35	0.348	0.348	0.343	0.353	0.353	0.353	0.351	0.346	0.351	0.346	0.351	0.348	0.346	0.356	0.343	0.348	0.353	0.351	0.334	0.334	0.36	0.355	0.353	0.352	0.355	0.355	0.352	0.358	0.352	0.355	0.355	0.355	0.355	0.355	0.355	0.35	0.357	0.355	0.35	0.355	0.363	0.357	0.355	0.357	0.36	0.352	0.355	0.355	0.352
MA14_66_12_Ophioleucidae_sp_Species_35	0.346	0.351	0.346	0.356	0.356	0.356	0.348	0.348	0.353	0.348	0.353	0.351	0.348	0.358	0.346	0.351	0.351	0.353	0.336	0.336	0.36	0.355	0.353	0.352	0.355	0.355	0.352	0.358	0.352	0.355	0.355	0.355	0.355	0.355	0.355	0.35	0.357	0.355	0.35	0.355	0.363	0.357	0.355	0.357	0.36	0.352	0.355	0.355	0.352
SO239_20_7_Ophioleucidae_sp_Species_35	0.346	0.351	0.346	0.356	0.356	0.356	0.348	0.348	0.353	0.348	0.353	0.351	0.348	0.358	0.346	0.351	0.351	0.353	0.336	0.336	0.36	0.355	0.353	0.352	0.355	0.355	0.352	0.358	0.352	0.355	0.355	0.355	0.355	0.355	0.355	0.35	0.357	0.355	0.35	0.355	0.363	0.357	0.355	0.357	0.36	0.352	0.355	0.355	0.352
SO239_24_5_Ophioleucidae_sp_Species_35	0.349	0.349	0.344	0.354	0.354	0.354	0.352	0.347	0.351	0.347	0.352	0.349	0.347	0.356	0.344	0.349	0.354	0.352	0.335	0.335	0.361	0.356	0.353	0.353	0.356	0.356	0.353	0.358	0.353	0.356	0.355	0.356	0.356	0.356	0.356	0.35	0.358	0.356	0.351	0.355	0.361	0.358	0.356	0.358	0.361	0.353	0.356	0.353	0.353
SO239_81_16_Ophioleucidae_sp_Species_35	0.348	0.348	0.344	0.353	0.353	0.353	0.351	0.346	0.351	0.346	0.351	0.348	0.346	0.356	0.344	0.348	0.353	0.351	0.334	0.334	0.36	0.355	0.353	0.353	0.355	0.355	0.352	0.358	0.352	0.355	0.355	0.355	0.355	0.355	0.352	0.35	0.358	0.355	0.35	0.356	0.363	0.355	0.355	0.358	0.36	0.353	0.355	0.355	0.352
SO239_81_25_Ophioleucidae_sp_Species_35	0.348	0.348	0.343	0.353	0.353	0.353	0.351	0.346	0.351	0.346	0.351	0.348	0.346	0.356	0.343	0.348	0.353	0.351	0.334	0.334	0.36	0.355	0.353	0.352	0.355	0.355	0.352	0.358	0.352	0.355	0.355	0.355	0.355	0.355	0.355	0.35	0.357	0.355	0.35	0.355	0.363	0.357	0.355	0.357	0.36	0.352	0.355	0.355	0.352
SO239_118_8_Ophioleucidae_sp_Species_35	0.348	0.348	0.343	0.353	0.353	0.353	0.351	0.346	0.351	0.346	0.351	0.348	0.346	0.356	0.343	0.348	0.353	0.351	0.334	0.334	0.36	0.355	0.353	0.352	0.355	0.355	0.352	0.358	0.352	0.355	0.355	0.355	0.355	0.355	0.355	0.35	0.357	0.355	0.35	0.355	0.363	0.357	0.355	0.357	0.36	0.352	0.355	0.355	0.352
SO239_118_14_Ophioleucidae_sp_Species_35	0.348	0.348	0.343	0.353	0.353	0.353	0.351	0.346	0.351	0.346	0.351	0.348	0.346	0.356	0.343	0.348	0.353	0.351	0.334	0.334	0.36	0.355	0.353	0.352	0.355	0.355	0.352	0.358	0.352	0.355	0.355	0.355	0.355	0.355	0.355	0.35	0.357	0.355	0.35	0.355	0.363	0.357	0.355	0.357	0.36	0.352	0.355	0.355	0.352
SO239_133_2_Ophioleucidae_sp_Species_35	0.348	0.348	0.343	0.353	0.353	0.353	0.351	0.346	0.351	0.346	0.351	0.348	0.346	0.356	0.343	0.348	0.353	0.351	0.334	0.334	0.36	0.355	0.353	0.352	0.355	0.355	0.352	0.358	0.352	0.355	0.355	0.355	0.355	0.355	0.355	0.35	0.357	0.355	0.35	0.355	0.363	0.357	0.355	0.357	0.36	0.352	0.355	0.355	0.352
AB1_EB5_3_Ophiosphalma_cf_glabrum_Species_36	0.259	0.264	0.257	0.273	0.257	0.264	0.264	0.268	0.264	0.268	0.27	0.264	0.259	0.268	0.262	0.257	0.262	0.264	0.253	0.253	0.255	0.251	0.247	0.253	0.251	0.251	0.249	0.255	0.251	0.251	0.251	0.251	0.251	0.251	0.253	0.249	0.245	0.249	0.249	0.256	0.253	0.255	0.251	0.253	0.255	0.247	0.251	0.249	0.249
AB1_EB3_9_2_Ophiosphalma_cf_glabrum_Species_36	0.262	0.266	0.257	0.275	0.259	0.266	0.266	0.273	0.266	0.271	0.273	0.266	0.262	0.27	0.264	0.259	0.264	0.266	0.255	0.255	0.26	0.255	0.251	0.257	0.255	0.255	0.253	0.26	0.255	0.255	0.255	0.255	0.255	0.255	0.257	0.253	0.249	0.253	0.253	0.26	0.257	0.26	0.255	0.257	0.255	0.251	0.255	0.253	0.253
AB1_EB5_10_2_Ophiosphalma_cf_glabrum_Species_36	0.259	0.264	0.257	0.273	0.259	0.266	0.268	0.277	0.264	0.268	0.27	0.264	0.259	0.268	0.262	0.257	0.262	0.264	0.255	0.255	0.251	0.247	0.243	0.249	0.247	0.247	0.245	0.251	0.247	0.247	0.247	0.247	0.247	0.247	0.249	0.245	0.243	0.245	0.245	0.251	0.249	0.251	0.247	0.249	0.247	0.242	0.247	0.245	0.245
AB1_EB4_11_3_Ophiosphalma_cf_glabrum_Species_36	0.264	0.268	0.261	0.277	0.262	0.268	0.268	0.277	0.268	0.273	0.275	0.268	0.264	0.273	0.266	0.262	0.266	0.268	0.258	0.258	0.257	0.253	0.249	0.255	0.253	0.253	0.251	0.258	0.253	0.253	0.253	0.253	0.253	0.253	0.255	0.251	0.247	0.251	0.251	0.258	0.255	0.257	0.253	0.255	0.253	0.249	0.253	0.251	0.251
AB2_EB1_14_2_Ophiosphalma_cf_glabrum_Species_36	0.259	0.259	0.253	0.268	0.253	0.259	0.259	0.268	0.259	0.264	0.266	0.259	0.255	0.264	0.257	0.253	0.257	0.259	0.249	0.249	0.262	0.257	0.254	0.26	0.257	0.257	0.255	0.262	0.257	0.257	0.258	0.257	0.257	0.258	0.26	0.255	0.251	0.255	0.255	0.262	0.26	0.262	0.257	0.26	0.257	0.253	0.257	0.255	0.255
AB2_EB2_15_14_Ophiosphalma_cf_glabrum_Species_36	0.268	0.273	0.266	0.282	0.266	0.273	0.273	0.281	0.273	0.277	0.279	0.273	0.268	0.277	0.27	0.266	0.27	0.273	0.262	0.262	0.253	0.249	0.245	0.251	0.249	0.249	0.247	0.253	0.249	0.249	0.249	0.249	0.249	0.249	0.251	0.247	0.242	0.247	0.247	0.253	0.251	0.253	0.249	0.251	0.249	0.245	0.249	0.247	0.247
AB2_EB1_16_4_Ophiosphalma_cf_glabrum_Species_36	0.264	0.268	0.262	0.277	0.262	0.268	0.268	0.277	0.268	0.273	0.273	0.268	0.264	0.273	0.266	0.262	0.266	0.268	0.258	0.258	0.258	0.253	0.249	0.255	0.253	0.253	0.251	0.258	0.253	0.253	0.253	0.253	0.253	0.253	0.255	0.251	0.247	0.251	0.251	0.258	0.255	0.257	0.253	0.255	0.253	0.249	0.253	0.251	0.251
NODBIO_33_10_Ophiosphalma_cf_glabrum_Species_36	0.259	0.264	0.257	0.273	0.257	0.264	0.264	0.273	0.264	0.268	0.27	0.264	0.259	0.268	0.262	0.257	0.262	0.264	0.253	0.253	0.255	0.251	0.247	0.249	0.251	0.251	0.249	0.255	0.251	0.251	0.251	0.251	0.251	0.251	0.253	0.249	0.245	0.249	0.249	0.256	0.253	0.255	0.251	0.253	0.251	0.247	0.251	0.249	0.249
NODBIO_33_7_Ophiosphalma_cf_glabrum_Species_36	0.264	0.268	0.261	0.277	0.262	0.268	0.268	0.277	0.268	0.273	0.275	0.268	0.264	0.273	0.266	0.262	0.266	0.268	0.258	0.258	0.255	0.251	0.247	0.253	0.251	0.251	0.249	0.255	0.251	0.251	0.251	0.251	0.251	0.251	0.253	0.249	0.245	0.249	0.249	0.256	0.253	0.255	0.251	0.253	0.251	0.247	0.251	0.249	0.249
MA13_07_7_Ophiosphalma_cf_glabrum_Species_36	0.266	0.27	0.264	0.277	0.264	0.27	0.27	0.275	0.27	0.275	0.277	0.27	0.266	0.275	0.268	0.264	0.268	0.266	0.26	0.26	0.257	0.253	0.249	0.251	0.253	0.253	0.251	0.258	0.253	0.253	0.253	0.253	0.253	0.253	0.255	0.251	0.247	0.251	0.251	0.258	0.255	0.257	0.253	0.255	0.249	0.249	0.253	0.251	0.251
MA13_85_41_Ophiosphalma_cf_glabrum_Species_36	0.259	0.264	0.257	0.273	0.257	0.264	0.264	0.273	0.264	0.264	0.27	0.264	0.259	0.268	0.262	0.257	0.262	0.264	0.253	0.253	0.251	0.247	0.243	0.249	0.247	0.247	0.244	0.251	0.247	0.247	0.247	0.247	0.247	0.247	0.249	0.244	0.24	0.244	0.244	0.251	0.249	0.251	0.247	0.249	0.247	0.242	0.247	0.244	0.244
MA14_20_3_Ophiosphalma_cf_glabrum_Species_36	0.268	0.273	0.266	0.282	0.266	0.273	0.273	0.277	0.273	0.277	0.279	0.273	0.268	0.277	0.27	0.266	0.27	0.273	0.262	0.262	0.255	0.251	0.247	0.253	0.251	0.251	0.249	0.255	0.251	0.251	0.251	0.251	0.251	0.251	0.253	0.249	0.245	0.249	0.249	0.256	0.253	0.255	0.251	0.253	0.251	0.247	0.251	0.249	0.249
MA14_21_2_Ophiosphalma_cf_glabrum_Species_36	0.268	0.273	0.266	0.282	0.266	0.273	0.273	0.281	0.273	0.277	0.279	0.273	0.268	0.277	0.27	0.266	0.27	0.273	0.258	0.258	0.26	0.255	0.251	0.258	0.255	0.255	0.253	0.26	0.255	0.255	0.255	0.255	0.255	0.255	0.257	0.253	0.249	0.253	0.253	0.26	0.257	0.26	0.255	0.257	0.255	0.251	0.255	0.253	0.253
MA14_38_15_Ophiosphalma_cf_glabrum_Species_36	0.266	0.266	0.264	0.279	0.264	0.27	0.27	0.279	0.266	0.27	0.277	0.27	0.266	0.27	0.268	0.264	0.268	0.27	0.258	0.258	0.255	0.251	0.247	0.253	0.251	0.251	0.249	0.255	0.251	0.251	0.251	0.251	0.251	0.251	0.253	0.249	0.245	0.249	0.249	0.256	0.253	0.255	0.251	0.253	0.251	0.247	0.251	0.249	0.249
SO239_24-1-1_Ophiosphalma_cf_glabrum_Species_36	0.257	0.262	0.255	0.271	0.255	0.262	0.262	0.27	0.262	0.266	0.268	0.262	0.257	0.266	0.26	0.255	0.26	0.262	0.251	0.251	0.251	0.247	0.243	0.249	0.247	0.247	0.244	0.251	0.247	0.247	0.247	0.247	0.247	0.247	0.249	0.244	0.24	0.244	0.244	0.251	0.249	0.251	0.247	0.249	0.247	0.242	0.247	0.245	0.244
SO239_24_18_Ophiosphalma_cf_glabrum_Species_36	0.257	0.261	0.255	0.27	0.255	0.261	0.261	0.27	0.262	0.266	0.268	0.261	0.257	0.266	0.259	0.255	0.259	0.261	0.253	0.253	0.253	0.253	0.249	0.255	0.253	0.253	0.251	0.258	0.253	0.253	0.253	0.253	0.253	0.253	0.255	0.251	0.247	0.251	0.251	0.258	0.255	0.257	0.253	0.255	0.253	0.249	0.253	0.251	0.251
SO239_50_10_Ophiosphalma_cf_glabrum_Species_36	0.262	0.261	0.255	0.27	0.255	0.261	0.261	0.266	0.264	0.266	0.268	0.261	0.257	0.266	0.259	0.255	0.259	0.261	0.251	0.251	0.255	0.251	0.247	0.253	0.251	0.251	0.249	0.255	0.251	0.251	0.251	0.251	0.251	0.251	0.253	0.249	0.245	0.249	0.249	0.256	0.253	0.255	0.251	0.253	0.251	0.247	0.251	0.249	0.249
SO239_2014_Ophiosphalma_cf_glabrum_Species_36	0.264	0.268	0.261	0.277	0.262	0.268	0.268	0.277	0.268	0.273	0.275	0.268	0.264	0.273	0.266	0.262	0.266	0.268	0.258	0.258	0.257	0.253	0.249	0.255	0.253	0.253	0.251	0.258	0.253	0.253	0.253	0.253	0.253	0.253	0.255	0.251	0.247	0.251	0.251	0.258	0.255	0.257	0.253	0.255	0.253	0.249	0.253	0.251	0.251
SO242_1_116_A5_Ophiosphalma_cf_glabrum_Species_36	0.262	0.266	0.259	0.275	0.259	0.266	0.266	0.275	0.266	0.27	0.273	0.266	0.262	0.27	0.264	0.259	0.264	0.266	0.255	0.255	0.255	0.251	0.247	0.253	0.251	0.251	0.249	0.255	0.251	0.251	0.251	0.251	0.251	0.251	0.253	0.249	0.245	0.249	0.249	0.256	0.253	0.255	0.251	0.253	0.251	0.247	0.251	0.249	0.249
SO242_1_076_Ophiosphalma_cf_glabrum_Species_36	0.264	0.266	0.266	0.277	0.261	0.268	0.268	0.272	0.266	0.275	0.275	0.268	0.264	0.27	0.266	0.261	0.266	0.268	0.258	0.258	0.249	0.245	0.241	0.247	0.245	0.245	0.242	0.249	0.245	0.245	0.245	0.245	0.245	0.245	0.247	0.242	0.242	0.242	0.247	0.249	0.247	0.249	0.245	0.247	0.245	0.24	0.245	0.242	0.242
SO242_2_154_Ophiosphalma_cf_glabrum_Species_36	0.262	0.266	0.259	0.275	0.259	0.266	0.266	0.275	0.266	0.27	0.273	0.266	0.262	0.27	0.264	0.259	0.264	0.266	0.255	0.255	0.255	0.251	0.247	0.253	0.251	0.251	0.249	0.255	0.251	0.251	0.251	0.251	0.251	0.251	0.253	0.249	0.245	0.249	0.249	0.256	0.253	0.255	0.251	0.253	0.251	0.247	0.251	0.249	0.249
53_224_3_2_Ophiosphalma_cf_glabrum_Species_36	0.268	0.272	0.266	0.282	0.266	0.272	0.27	0.281	0.273	0.277	0.279	0.272	0.268	0.277	0.27	0.266	0.27	0.272	0.262	0.262	0.26	0.255	0.251	0.257	0.255	0.255	0.253	0.26	0.255	0.255	0.255	0.255	0.255	0.255	0.257	0.253	0.249	0.253	0.253	0.26	0.257	0.26	0.255	0.257	0.255	0.251	0.255	0.253	0.253
SO239_139_2_Ophioleucidae_sp_Species_37	0.325	0.318	0.33	0.321	0.323	0.325	0.318	0.32	0.316	0.321	0.323	0.32	0.321	0.318	0.323	0.323	0.321	0.323	0.308	0.308	0.34	0.337	0.333	0.333	0.332	0.335	0.332	0.34	0.332	0.335	0.335	0.335	0.335	0.335	0.335	0.337	0.333	0.335	0.337	0.335	0.342	0.34	0.335	0.337	0.335	0.33	0.335	0.335	0.332
SO239_192_1_Ophioleucidae_sp_Species_37	0.323	0.316	0.328	0.318	0.32	0.323	0.316	0.318	0.318	0.323	0.321	0.318	0.318	0.32	0.32	0.32	0.318	0.32	0.305	0.305	0.345	0.342	0.338	0.337	0.337	0.34	0.337	0.345	0.337	0.34	0.34	0.34	0.34	0.34	0.34	0.342	0.337	0.34	0.342	0.34	0.347	0.345	0.34	0.342	0.34	0.335	0.34	0.34	0.337
SO239_192_3_Ophioleucidae_sp_Species_37	0.318	0.311	0.323	0.313	0.316	0.318	0.311	0.313	0.313	0.318	0.316	0.313	0.313	0.315	0.315	0.316	0.313	0.315	0.3	0.3	0.345	0.342	0.338	0.335	0.337	0.34	0.337	0.345	0.337	0.34	0.337	0.34	0.34	0.34	0.34	0.342	0.337	0.34	0.342	0.34	0.347	0.344	0.34	0.342	0.34	0.335	0.34	0.34	0.337
SO239_197_1_Ophioleucidae_sp_Species_37	0.33	0.323	0.33	0.326	0.328	0.33	0.323	0.325	0.325	0.331	0.328	0.323	0.326	0.328	0.328	0.328	0.326	0.328	0.31	0.31	0.347	0.345	0.34	0.34	0.34	0.342	0.34	0.347	0.34	0.342	0.342	0.342	0.342	0.342	0.342	0.345	0.335	0.342	0.345	0.343	0.35	0.347	0.342	0.345	0.342	0.337	0.342	0.342	0.34
SO239_200_1_Ophioleucidae_sp_Species_37	0.325	0.318	0.33	0.321	0.323	0.325	0.318	0.32	0.316	0.321	0.323	0.32	0.321	0.318	0.323	0.323	0.321	0.323	0.308	0.308	0.34	0.337	0.333	0.333	0.332	0.335	0.332	0.34	0.332	0.335	0.335	0.335	0.335	0.335	0.335	0.337	0.333	0.335	0.337	0.335	0.342	0.34	0.335	0.337	0.335	0.33	0.335	0.335	0.332
SO242_1_116_Ophioscolecidae_sp_New_Species_38	0.249	0.242	0.253	0.251	0.251	0.255	0.247	0.259	0.242	0.251	0.247	0.24	0.247	0.244	0.244	0.244	0.251	0.253	0.253	0.253	0.286	0.288	0.284	0.284	0.286	0.286	0.288	0.286	0.288	0.286	0.281	0.286	0.284	0.286	0.288	0.288	0.288	0.286	0.288	0.289	0.29	0.29	0.286	0.288	0.29	0.284	0.286	0.286	0.288
SO242_1_422_Ophioscolecidae_sp_New_Species_38	0.251	0.244	0.255	0.253	0.253	0.257	0.249	0.261	0.244	0.253	0.249	0.242	0.249	0.247	0.249	0.247	0.253	0.255	0.255	0.255	0.288	0.29	0.286	0.286	0.288	0.288	0.29	0.288	0.29	0.288	0.284	0.288	0.286	0.288	0.29	0.29	0.29	0.288	0.29	0.291	0.293	0.293	0.288	0.29	0.293	0.286	0.288	0.288	0.29
53_175_5_Ophioscolecidae_sp_Species_38	0.249	0.242	0.253	0.251	0.251	0.255	0.247	0.259	0.242	0.251	0.246	0.24	0.247	0.244	0.246	0.244	0.251	0.253	0.253	0.253	0.288	0.29	0.286	0.286	0.288	0.288	0.29	0.288	0.29	0.288	0.284	0.288	0.286	0.288	0.29	0.29	0.29	0.288	0.29	0.291	0.293	0.293	0.288	0.29	0.293	0.286	0.288	0.288	0.29
53_053_4_Ophioscolecidae_sp_Species_38	0.251	0.244	0.255	0.253	0.253	0.257	0.249	0.261	0.244	0.253	0.249	0.242	0.249	0.247	0.249	0.247	0.253	0.255	0.255	0.255	0.288	0.29	0.286	0.286	0.288	0.288	0.29	0.288	0.29	0.288	0.284	0.288	0.286	0.288	0.29	0.29	0.29	0.288	0.29	0.291	0.293	0.293	0.288	0.29	0.293	0.286	0.288	0.288	0.29
AB2_EB1_13_41_Ophiocymbium_sp_Species_39	0.218	0.218	0.218	0.22	0.216	0.22	0.22	0.214	0.218	0.214	0.218	0.218	0.22	0.222	0.226	0.218	0.216	0.218	0.223	0.223	0.302	0.304	0.305	0.3	0.309	0.302	0.302	0.3	0.304	0.302	0.3	0.302	0.304	0.304	0.304	0.304	0.297	0.302	0.297	0.305	0.304	0.307	0.304	0.302	0.307	0.3	0.302	0.309	0.304
MA13_18_5_Ophiocymbium_sp_Species_39	0.222	0.222	0.222	0.224	0.224	0.229	0.224	0.218	0.222	0.218	0.222	0.222	0.224	0.226	0.231	0.222	0.22	0.222	0.227	0.227	0.302	0.305	0.305	0.3	0.309	0.302	0.302	0.3	0.305	0.302	0.3	0.302	0.305	0.304	0.305	0.305	0.297	0.302	0.298	0.305	0.305	0.307	0.305	0.302	0.307	0.302	0.302	0.309	0.305
AB1_EB4_11_28_Ophiocymbium_sp_Species_40	0.262	0.258	0.262	0.264	0.262	0.266	0.262	0.262	0.251	0.255	0.264	0.262	0.26	0.262	0.266	0.258	0.258	0.262	0.272	0.272	0.308	0.313	0.311	0.308	0.308	0.313	0.313	0.306	0.304	0.311	0.308	0.311	0.311	0.311	0.313	0.313	0.318	0.308	0.311	0.318	0.313	0.313	0.311	0.308	0.311	0.306	0.311	0.313	0.313
MA13_85_17_Ophiocymbium_sp_Species_40	0.264	0.26	0.264	0.266	0.264	0.269	0.26	0.264	0.253	0.258	0.266	0.26	0.262	0.264	0.269	0.26	0.26	0.264	0.274	0.274	0.315	0.315	0.313	0.311	0.311	0.315	0.313	0.313	0.306	0.313	0.311	0.313	0.313	0.313	0.315	0.315	0.32	0.311	0.313	0.321	0.315	0.315	0.313	0.311	0.313	0.308	0.313	0.315	0.315
MA14_21_10_Ophiocymbium_sp_Species_40	0.266	0.262	0.262	0.267	0.264	0.269	0.266	0.267	0.256	0.258	0.267	0.264	0.264	0.266	0.271	0.262	0.262	0.266	0.275	0.275	0.318	0.323	0.321	0.318	0.318	0.323	0.32	0.315	0.313	0.32	0.318	0.32	0.318	0.32	0.323	0.323	0.32	0.318	0.315	0.325	0.323	0.323	0.32	0.318	0.32	0.315	0.32	0.325	0.323
SO239_24_15_Ophiocymbium_sp_Species_40	0.262	0.258	0.262	0.264	0.262	0.266	0.262	0.262	0.251	0.255	0.264	0.262	0.26	0.262	0.266	0.258	0.258	0.262	0.272	0.272	0.308	0.313	0.311	0.308	0.308	0.313	0.313	0.306	0.304	0.311	0.308	0.311	0.311	0.311	0.313	0.313	0.318	0.308	0.311	0.318	0.313	0.313	0.311	0.308	0.311	0.306	0.311	0.313	0.313
SO239_24_19_Ophiocymbium_sp_Species_40	0.276	0.266	0.271	0.271	0.269	0.273	0.269	0.267	0.26	0.264	0.271	0.264	0.269	0.271	0.276	0.267	0.276	0.271	0.272	0.272	0.316	0.311	0.314	0.315	0.311	0.316	0.313	0.313	0.306	0.313	0.311	0.313	0.311	0.313	0.316	0.316	0.32	0.311	0.313	0.321	0.316	0.316	0.313	0.311	0.318	0.309	0.313	0.318	0.316
53_204_2_Ophiocymbium_Species_40	0.278	0.264	0.273	0.269	0.266	0.271	0.271	0.269	0.258	0.262	0.269	0.266	0.271	0.268	0.273	0.269	0.273	0.269	0.272	0.272	0.301	0.306	0.304	0.301	0.301	0.306	0.304	0.304	0.297	0.304	0.301	0.304	0.304	0.304	0.306	0.306	0.313	0.301	0.304	0.311	0.306	0.306	0.304	0.301	0.304	0.299	0.304	0.306	0.306
SO239_81_4_Ophiotholia_sp_Species_41	0.299	0.292	0.283	0.288	0.29	0.292	0.29	0.288	0.295	0.288	0.283	0.281	0.29	0.295	0.29	0.29	0.295	0.29	0.283	0.283	0.397	0.394	0.392	0.391	0.394	0.397	0.394	0.397	0.394	0.394	0.389	0.394	0.394	0.394	0.397	0.394	0.384	0.394	0.391	0.4	0.402	0.399	0.394	0.397	0.389	0.391	0.394	0.392	0.397
SO239_192_5_Ophioleucidae_sp_Species_42	0.249	0.249	0.249	0.241	0.243	0.245	0.238	0.243	0.249	0.243	0.243	0.24	0.249	0.247	0.249	0.249	0.245	0.245	0.244	0.244	0.31	0.306	0.309	0.303	0.303	0.306	0.306	0.303	0.306	0.306	0.301	0.306	0.303	0.303	0.308	0.308	0.292	0.306	0.301	0.311	0.308	0.308	0.306	0.303	0.31	0.306	0.306	0.305	0.308
AB2_EB1_13_27_Ophiuroglypha_cf_polyacantha_Species_43	0.304	0.304	0.308	0.311	0.306	0.306	0.296	0.294	0.299	0.301	0.304	0.301	0.304	0.304	0.304	0.304	0.304	0.311	0.302	0.302	0.262	0.262	0.265	0.262	0.271	0.262	0.265	0.265	0.262	0.262	0.262	0.262	0.26	0.26	0.265	0.265	0.267	0.262	0.264	0.267	0.265	0.267	0.262	0.26	0.258	0.265	0.262	0.267	0.265
SO239_118_6_Ophiuroglypha_cf_polyacantha_Species_43	0.297	0.299	0.303	0.304	0.299	0.299	0.289	0.287	0.294	0.294	0.296	0.294	0.299	0.296	0.299	0.299	0.296	0.303	0.294	0.294	0.26	0.26	0.263	0.26	0.269	0.26	0.262	0.262	0.26	0.26	0.26	0.26	0.258	0.258	0.262	0.262	0.265	0.26	0.262	0.265	0.262	0.264	0.26	0.258	0.26	0.262	0.26	0.264	0.262
SO239_682_Ophiuroglypha_cf_polyacantha_Species_43	0.301	0.303	0.308	0.308	0.304	0.303	0.294	0.292	0.299	0.299	0.301	0.299	0.304	0.301	0.304	0.304	0.301	0.308	0.299	0.299	0.262	0.262	0.265	0.262	0.271	0.262	0.264	0.265	0.262	0.262	0.262	0.262	0.26	0.26	0.264	0.264	0.267	0.262	0.264	0.267	0.264	0.267	0.262	0.26	0.258	0.265	0.262	0.267	0.264
SO239_2037_Ophiuroglypha_cf_polyacantha_Species_43	0.301	0.303	0.308	0.308	0.304	0.303	0.294	0.292	0.299	0.299	0.301	0.299	0.304	0.301	0.304	0.304	0.301	0.308	0.299	0.299	0.262	0.262	0.265	0.262	0.271	0.262	0.264	0.265	0.262	0.262	0.262	0.262	0.26	0.26	0.264	0.264	0.267	0.262	0.264	0.267	0.264	0.267	0.262	0.26	0.258	0.265	0.262	0.267	0.264
Table S1B. Estimates (K2P) of Evolutionary Divergence between Sequences
The number of base substitutions per site from between sequences are shown. Analyses were conducted using the Kimura 2-parameter model [1]. The analysis involved 300 nucleotide sequences. Codon positions included were 1st+2nd+3rd+Noncoding. All ambiguous positions were removed for each sequence pair. There were a total of 657 positions in the final dataset. Evolutionary analyses were conducted in…
[truncated: 250 more columns]
