# Supplementary material for: Unexpected high abyssal ophiuroid diversity in polymetallic nodule fields of the Northeast Pacific Ocean, and implications for conservation
Source: Copernicus journal article supplement (doi:10.5194/bg-2019-360), 2019-11-26
Supplement: Supplementary file 2 [file Table S_2.xlsx]

## Sheet: p-distance
	Species 1	Species 2	Species 3	Species 4	Species 5	Species 6	Species 7	Species 8	Species 9	Species 10	Species 11	Species 12	Species 13	Species 14	Species 15	Species 16	Species 17	Species 18	Species 19	Species 20	Species 21	Species 22	Species 23	Species 24	Species 25	Species 26	Species 27	Species 28	Species 29	Species 30	Species 31	Species 32	Species 33	Species 34	Species 35	Species 36	Species 37	Species 38	Species 39	Species 40	Species 41	Species 42	Species 43
Species 1
Species 2	0.23
Species 3	0.222	0.215
Species 4	0.237	0.099	0.229
Species 5	0.235	0.216	0.225	0.22
Species 6	0.254	0.226	0.226	0.222	0.212
Species 7	0.233	0.209	0.21	0.219	0.201	0.133
Species 8	0.219	0.232	0.208	0.244	0.227	0.186	0.175
Species 9	0.204	0.233	0.205	0.224	0.235	0.192	0.171	0.162
Species 10	0.211	0.213	0.224	0.225	0.228	0.181	0.169	0.172	0.166
Species 11	0.208	0.212	0.204	0.223	0.213	0.182	0.167	0.178	0.167	0.178
Species 12	0.228	0.217	0.191	0.233	0.217	0.2	0.192	0.193	0.205	0.197	0.187
Species 13	0.218	0.221	0.178	0.214	0.238	0.219	0.194	0.189	0.178	0.197	0.179	0.19
Species 14	0.221	0.197	0.187	0.197	0.2	0.155	0.143	0.184	0.167	0.168	0.16	0.184	0.174
Species 15	0.209	0.202	0.201	0.215	0.226	0.197	0.193	0.197	0.19	0.198	0.174	0.185	0.202	0.149
Species 16	0.214	0.213	0.222	0.226	0.226	0.202	0.178	0.181	0.196	0.17	0.178	0.189	0.194	0.176	0.169
Species 17	0.21	0.222	0.218	0.213	0.258	0.24	0.237	0.242	0.22	0.23	0.222	0.233	0.218	0.209	0.22	0.221
Species 18	0.214	0.244	0.241	0.237	0.266	0.245	0.254	0.22	0.197	0.244	0.217	0.248	0.207	0.224	0.224	0.239	0.219
Species 19	0.239	0.241	0.244	0.241	0.236	0.226	0.245	0.247	0.229	0.242	0.233	0.26	0.239	0.236	0.245	0.242	0.218	0.184
Species 20	0.221	0.237	0.239	0.24	0.236	0.252	0.242	0.242	0.217	0.24	0.22	0.247	0.232	0.233	0.229	0.231	0.209	0.18	0.215
Species 21	0.226	0.219	0.218	0.223	0.198	0.217	0.2	0.208	0.207	0.224	0.218	0.211	0.22	0.213	0.203	0.212	0.229	0.22	0.215	0.219
Species 22	0.237	0.238	0.219	0.233	0.233	0.223	0.203	0.224	0.214	0.231	0.226	0.211	0.22	0.217	0.211	0.225	0.24	0.253	0.246	0.244	0.21
Species 23	0.22	0.244	0.242	0.238	0.217	0.217	0.235	0.22	0.219	0.21	0.224	0.216	0.232	0.203	0.223	0.204	0.226	0.203	0.227	0.213	0.203	0.217
Species 24	0.188	0.263	0.246	0.261	0.259	0.256	0.254	0.215	0.201	0.217	0.226	0.235	0.231	0.226	0.224	0.223	0.23	0.226	0.25	0.233	0.222	0.261	0.23
Species 25	0.237	0.262	0.242	0.253	0.247	0.244	0.242	0.237	0.252	0.241	0.242	0.247	0.257	0.227	0.23	0.231	0.254	0.247	0.264	0.259	0.229	0.242	0.243	0.191
Species 26	0.199	0.253	0.224	0.26	0.237	0.234	0.238	0.214	0.233	0.22	0.221	0.238	0.211	0.219	0.22	0.218	0.235	0.238	0.234	0.22	0.205	0.251	0.218	0.208	0.248
Species 27	0.297	0.339	0.347	0.338	0.342	0.338	0.35	0.332	0.313	0.323	0.316	0.354	0.324	0.334	0.339	0.324	0.326	0.3	0.328	0.33	0.333	0.351	0.319	0.302	0.337	0.298
Species 28	0.24	0.298	0.287	0.293	0.303	0.299	0.297	0.264	0.251	0.262	0.262	0.271	0.264	0.271	0.284	0.264	0.273	0.27	0.305	0.288	0.298	0.302	0.291	0.23	0.278	0.239	0.294
Species 29	0.217	0.265	0.25	0.255	0.259	0.247	0.261	0.226	0.229	0.209	0.248	0.253	0.24	0.239	0.256	0.236	0.233	0.227	0.243	0.242	0.232	0.247	0.221	0.221	0.259	0.22	0.273	0.275
Species 30	0.224	0.226	0.22	0.229	0.252	0.264	0.236	0.24	0.227	0.23	0.222	0.223	0.229	0.223	0.216	0.191	0.217	0.235	0.253	0.25	0.224	0.237	0.251	0.232	0.258	0.226	0.32	0.294	0.237
Species 31	0.199	0.236	0.205	0.238	0.229	0.237	0.214	0.213	0.221	0.23	0.221	0.211	0.195	0.221	0.216	0.203	0.213	0.229	0.239	0.237	0.205	0.221	0.232	0.228	0.238	0.216	0.322	0.262	0.21	0.209
Species 32	0.233	0.239	0.226	0.241	0.256	0.253	0.232	0.266	0.228	0.259	0.223	0.246	0.239	0.226	0.22	0.249	0.228	0.263	0.252	0.264	0.251	0.238	0.253	0.257	0.259	0.251	0.37	0.298	0.275	0.243	0.239
Species 33	0.27	0.273	0.257	0.28	0.283	0.292	0.277	0.28	0.276	0.291	0.279	0.271	0.277	0.271	0.286	0.273	0.28	0.283	0.282	0.283	0.281	0.253	0.285	0.296	0.288	0.282	0.334	0.295	0.286	0.284	0.258	0.257
Species 34	0.253	0.273	0.265	0.266	0.278	0.279	0.268	0.253	0.256	0.28	0.253	0.274	0.249	0.262	0.283	0.247	0.263	0.275	0.304	0.261	0.268	0.254	0.27	0.246	0.277	0.258	0.322	0.277	0.248	0.251	0.247	0.265	0.237
Species 35	0.278	0.281	0.256	0.278	0.293	0.286	0.291	0.283	0.266	0.297	0.274	0.272	0.263	0.286	0.298	0.279	0.292	0.282	0.296	0.286	0.285	0.267	0.292	0.293	0.302	0.286	0.353	0.303	0.299	0.275	0.265	0.28	0.249	0.2
Species 36	0.223	0.214	0.05	0.228	0.232	0.224	0.206	0.215	0.198	0.211	0.202	0.187	0.187	0.191	0.2	0.224	0.223	0.232	0.258	0.238	0.215	0.231	0.236	0.232	0.243	0.226	0.343	0.285	0.247	0.227	0.21	0.228	0.258	0.273	0.256
Species 37	0.26	0.271	0.265	0.288	0.278	0.272	0.277	0.271	0.263	0.287	0.267	0.266	0.261	0.262	0.26	0.254	0.261	0.259	0.293	0.27	0.278	0.297	0.269	0.269	0.283	0.255	0.331	0.285	0.276	0.259	0.26	0.299	0.274	0.183	0.21	0.264
Species 38	0.212	0.239	0.241	0.24	0.255	0.247	0.249	0.247	0.232	0.253	0.233	0.246	0.221	0.234	0.235	0.226	0.215	0.115	0.202	0.204	0.236	0.257	0.228	0.251	0.258	0.238	0.318	0.275	0.234	0.232	0.228	0.259	0.299	0.275	0.28	0.238	0.249
Species 39	0.191	0.249	0.239	0.254	0.259	0.262	0.249	0.23	0.221	0.22	0.226	0.237	0.236	0.233	0.22	0.227	0.241	0.231	0.242	0.218	0.226	0.257	0.239	0.092	0.176	0.21	0.318	0.243	0.231	0.228	0.237	0.255	0.295	0.262	0.304	0.239	0.273	0.248
Species 40	0.223	0.255	0.236	0.245	0.233	0.233	0.228	0.217	0.24	0.227	0.231	0.233	0.245	0.213	0.218	0.21	0.236	0.238	0.25	0.24	0.221	0.235	0.248	0.177	0.108	0.233	0.327	0.262	0.245	0.241	0.227	0.254	0.282	0.263	0.302	0.236	0.273	0.245	0.16
Species 41	0.24	0.305	0.28	0.292	0.291	0.306	0.303	0.262	0.252	0.264	0.271	0.279	0.257	0.274	0.28	0.267	0.266	0.266	0.3	0.299	0.298	0.292	0.299	0.242	0.275	0.254	0.298	0.08	0.28	0.291	0.26	0.297	0.28	0.275	0.299	0.285	0.292	0.279	0.249	0.262
Species 42	0.209	0.25	0.256	0.244	0.264	0.253	0.247	0.256	0.23	0.229	0.231	0.248	0.23	0.234	0.258	0.22	0.234	0.226	0.247	0.244	0.231	0.25	0.239	0.23	0.259	0.214	0.264	0.265	0.109	0.229	0.206	0.277	0.283	0.251	0.3	0.26	0.268	0.23	0.221	0.248	0.275
Species 43	0.246	0.222	0.232	0.229	0.229	0.064	0.146	0.208	0.203	0.194	0.186	0.219	0.223	0.159	0.201	0.218	0.238	0.248	0.245	0.25	0.224	0.231	0.229	0.247	0.243	0.224	0.339	0.293	0.257	0.266	0.241	0.246	0.291	0.278	0.295	0.222	0.277	0.256	0.264	0.236	0.301	0.264
Table S2A. Estimates (p-distance) of Evolutionary Divergence over Sequence Pairs between SSHs
The number of base differences per site from averaging over all sequence pairs between groups are shown. The analysis involved 300 nucleotide sequences. Codon positions included were 1st+2nd+3rd+Noncoding. All ambiguous positions were removed for each sequence pair. There were a total of 657 positions in the final dataset. Evolutionary analyses were conducted in MEGA7.

## Sheet: K2P
	Species 1	Species 2	Species 3	Species 4	Species 5	Species 6	Species 7	Species 8	Species 9	Species 10	Species 11	Species 12	Species 13	Species 14	Species 15	Species 16	Species 17	Species 18	Species 19	Species 20	Species 21	Species 22	Species 23	Species 24	Species 25	Species 26	Species 27	Species 28	Species 29	Species 30	Species 31	Species 32	Species 33	Species 34	Species 35	Species 36	Species 37	Species 38	Species 39	Species 40	Species 41	Species 42	Species 43
Species 1
Species 2	0.275
Species 3	0.264	0.254
Species 4	0.285	0.108	0.274
Species 5	0.282	0.255	0.268	0.261
Species 6	0.312	0.27	0.271	0.264	0.25
Species 7	0.28	0.246	0.249	0.259	0.234	0.147
Species 8	0.26	0.279	0.244	0.296	0.271	0.214	0.201
Species 9	0.238	0.28	0.241	0.266	0.283	0.224	0.196	0.183
Species 10	0.249	0.251	0.268	0.268	0.273	0.209	0.193	0.197	0.188
Species 11	0.244	0.249	0.239	0.265	0.251	0.21	0.19	0.204	0.19	0.205
Species 12	0.272	0.256	0.221	0.28	0.257	0.234	0.223	0.225	0.24	0.229	0.216
Species 13	0.258	0.262	0.203	0.252	0.287	0.261	0.227	0.219	0.203	0.229	0.204	0.22
Species 14	0.262	0.229	0.216	0.229	0.232	0.175	0.16	0.212	0.189	0.191	0.18	0.212	0.197
Species 15	0.245	0.236	0.234	0.254	0.27	0.23	0.224	0.23	0.222	0.231	0.199	0.213	0.236	0.166
Species 16	0.252	0.251	0.264	0.269	0.27	0.237	0.205	0.208	0.228	0.193	0.204	0.218	0.225	0.201	0.192
Species 17	0.246	0.264	0.258	0.25	0.316	0.291	0.286	0.293	0.261	0.276	0.264	0.28	0.257	0.245	0.261	0.262
Species 18	0.252	0.295	0.293	0.285	0.328	0.297	0.311	0.261	0.229	0.297	0.257	0.301	0.242	0.267	0.266	0.288	0.259
Species 19	0.288	0.291	0.296	0.291	0.284	0.27	0.297	0.299	0.274	0.293	0.279	0.32	0.288	0.283	0.298	0.293	0.258	0.212
Species 20	0.261	0.286	0.289	0.29	0.284	0.311	0.294	0.294	0.257	0.29	0.262	0.301	0.278	0.28	0.275	0.277	0.246	0.208	0.255
Species 21	0.27	0.259	0.258	0.266	0.232	0.258	0.234	0.244	0.243	0.268	0.259	0.248	0.261	0.251	0.238	0.251	0.274	0.261	0.254	0.259
Species 22	0.286	0.287	0.26	0.28	0.281	0.266	0.238	0.268	0.254	0.28	0.272	0.248	0.262	0.259	0.249	0.268	0.291	0.311	0.301	0.298	0.248
Species 23	0.261	0.296	0.293	0.287	0.256	0.257	0.283	0.261	0.26	0.248	0.267	0.256	0.278	0.237	0.265	0.238	0.269	0.237	0.271	0.252	0.238	0.258
Species 24	0.217	0.325	0.3	0.322	0.32	0.314	0.313	0.253	0.234	0.257	0.27	0.283	0.276	0.268	0.267	0.265	0.276	0.269	0.305	0.28	0.265	0.323	0.276
Species 25	0.287	0.323	0.294	0.31	0.301	0.296	0.294	0.285	0.308	0.292	0.294	0.3	0.316	0.271	0.276	0.278	0.311	0.3	0.327	0.318	0.274	0.293	0.294	0.221
Species 26	0.231	0.309	0.267	0.321	0.287	0.283	0.287	0.251	0.28	0.261	0.262	0.287	0.248	0.26	0.261	0.259	0.283	0.286	0.28	0.26	0.241	0.308	0.258	0.244	0.303
Species 27	0.378	0.458	0.473	0.454	0.461	0.452	0.477	0.44	0.409	0.427	0.413	0.486	0.427	0.447	0.453	0.425	0.429	0.385	0.432	0.439	0.447	0.479	0.418	0.387	0.451	0.381
Species 28	0.289	0.383	0.364	0.374	0.393	0.387	0.385	0.327	0.307	0.324	0.323	0.341	0.326	0.338	0.361	0.328	0.342	0.336	0.392	0.364	0.385	0.392	0.37	0.276	0.349	0.288	0.373
Species 29	0.257	0.331	0.306	0.314	0.32	0.303	0.325	0.269	0.274	0.246	0.305	0.313	0.291	0.29	0.315	0.285	0.28	0.271	0.294	0.293	0.281	0.305	0.263	0.262	0.32	0.262	0.339	0.343
Species 30	0.266	0.269	0.262	0.273	0.309	0.327	0.285	0.291	0.272	0.277	0.265	0.266	0.273	0.265	0.255	0.22	0.256	0.283	0.309	0.306	0.267	0.284	0.307	0.28	0.318	0.27	0.422	0.375	0.287
Species 31	0.231	0.284	0.24	0.287	0.275	0.287	0.253	0.252	0.263	0.275	0.264	0.249	0.227	0.263	0.255	0.238	0.252	0.273	0.289	0.286	0.242	0.262	0.279	0.275	0.288	0.256	0.423	0.324	0.247	0.246
Species 32	0.279	0.288	0.27	0.291	0.313	0.31	0.278	0.33	0.273	0.318	0.266	0.299	0.287	0.27	0.26	0.303	0.272	0.324	0.308	0.327	0.306	0.287	0.309	0.316	0.319	0.306	0.512	0.382	0.345	0.293	0.288
Species 33	0.336	0.34	0.315	0.352	0.356	0.372	0.347	0.351	0.345	0.37	0.349	0.336	0.346	0.337	0.36	0.341	0.352	0.356	0.353	0.357	0.352	0.31	0.359	0.378	0.366	0.354	0.448	0.377	0.365	0.361	0.317	0.315
Species 34	0.309	0.341	0.328	0.329	0.35	0.352	0.333	0.31	0.315	0.353	0.31	0.342	0.302	0.325	0.357	0.301	0.325	0.344	0.392	0.32	0.333	0.311	0.335	0.299	0.346	0.317	0.424	0.346	0.303	0.308	0.301	0.327	0.287
Species 35	0.348	0.354	0.314	0.348	0.372	0.363	0.372	0.358	0.329	0.379	0.342	0.338	0.324	0.361	0.38	0.351	0.37	0.355	0.377	0.361	0.361	0.331	0.37	0.373	0.387	0.36	0.481	0.389	0.385	0.344	0.328	0.351	0.303	0.233
Species 36	0.266	0.252	0.052	0.273	0.278	0.268	0.243	0.254	0.231	0.249	0.236	0.216	0.216	0.221	0.232	0.267	0.265	0.279	0.317	0.289	0.255	0.277	0.284	0.278	0.295	0.27	0.464	0.361	0.302	0.272	0.247	0.273	0.317	0.34	0.314
Species 37	0.32	0.338	0.328	0.364	0.349	0.34	0.349	0.337	0.325	0.364	0.332	0.33	0.322	0.323	0.321	0.312	0.322	0.318	0.373	0.336	0.348	0.381	0.334	0.334	0.355	0.312	0.439	0.36	0.347	0.32	0.321	0.383	0.343	0.21	0.247	0.326
Species 38	0.25	0.288	0.291	0.29	0.312	0.301	0.304	0.299	0.277	0.309	0.28	0.299	0.261	0.282	0.283	0.27	0.254	0.126	0.237	0.239	0.285	0.315	0.272	0.306	0.317	0.286	0.414	0.343	0.281	0.277	0.272	0.319	0.382	0.343	0.351	0.286	0.304
Species 39	0.221	0.303	0.289	0.312	0.319	0.324	0.304	0.275	0.263	0.262	0.27	0.286	0.283	0.279	0.261	0.271	0.292	0.277	0.293	0.258	0.27	0.317	0.29	0.098	0.202	0.247	0.415	0.294	0.277	0.273	0.287	0.312	0.375	0.322	0.39	0.29	0.339	0.302
Species 40	0.265	0.313	0.285	0.297	0.28	0.28	0.272	0.257	0.29	0.272	0.277	0.279	0.297	0.251	0.258	0.246	0.285	0.287	0.305	0.291	0.262	0.283	0.303	0.202	0.118	0.28	0.432	0.324	0.298	0.291	0.272	0.311	0.355	0.323	0.387	0.285	0.341	0.296	0.181
Species 41	0.289	0.395	0.352	0.372	0.371	0.398	0.394	0.323	0.308	0.326	0.337	0.351	0.315	0.342	0.353	0.332	0.33	0.329	0.384	0.382	0.384	0.373	0.383	0.293	0.345	0.31	0.381	0.085	0.352	0.371	0.321	0.379	0.352	0.344	0.382	0.359	0.37	0.349	0.303	0.324
Species 42	0.245	0.305	0.315	0.297	0.327	0.314	0.303	0.315	0.277	0.275	0.279	0.305	0.275	0.284	0.319	0.263	0.283	0.269	0.299	0.296	0.28	0.308	0.29	0.275	0.321	0.253	0.326	0.328	0.12	0.275	0.242	0.347	0.361	0.308	0.387	0.322	0.335	0.275	0.262	0.303	0.345
Species 43	0.301	0.264	0.28	0.275	0.276	0.068	0.165	0.245	0.239	0.226	0.215	0.261	0.267	0.18	0.236	0.261	0.288	0.302	0.299	0.308	0.268	0.278	0.275	0.3	0.295	0.267	0.456	0.375	0.32	0.331	0.293	0.3	0.371	0.35	0.378	0.266	0.348	0.316	0.328	0.285	0.387	0.332
Table S2B. Estimates (K2P) of Evolutionary Divergence over Sequence Pairs between SSHs
